# Supplementary material for: Impaired remapping of social relationships in older adults
Source: PubMed Central journal article supplement (PMC8578667; doi:10.1038/s41598-021-01258-7), 2021-11-09
Supplement: 41598_2021_1258_MOESM1_ESM.pdf [file 41598_2021_1258_MOESM1_ESM.pdf]

# Impaired Remapping of Social Relationships in Older Adults

Jan Oltmer\*<sup>1,2,3</sup> Thomas Wolbers<sup>1,4</sup> Esther Kuehn<sup>1,3,4</sup>

<sup>1</sup> German Center for Neurodegenerative Diseases (DZNE), Magdeburg, 30120, Germany

<sup>2</sup> Athinoula A. Martinos Center for Biomedical Imaging, Department of Radiology, Massachusetts General Hospital & Harvard Medical School, Charlestown, 02129, USA

<sup>3</sup> Institute for Cognitive Neurology and Dementia Research (IKND), Otto-von-Guericke University Magdeburg, 39120, Germany

<sup>4</sup> Center for Behavioral Brain Sciences (CBBS) Magdeburg, Magdeburg, 39120, Germany

## Supplementary Material - Table of Contents

|                                                                             |           |
|-----------------------------------------------------------------------------|-----------|
| <b>S1 Instructions</b>                                                      | <b>2</b>  |
| <i>S1.1 Imprinting-Phase</i>                                                | 2         |
| <i>S1.2 Modification-Phase</i>                                              | 3         |
| <i>S1.3 Memory test</i>                                                     | 4         |
| <b>S2 Avatars and Virtual-environment</b>                                   | <b>5</b>  |
| <i>S2.1 Avatars</i>                                                         | 5         |
| <i>S2.2 Virtual-environment</i>                                             | 5         |
| <b>S3 Backstory and presentation of the virtual-environment (Dollstedt)</b> | <b>7</b>  |
| <i>S3.1 Imprinting-phase</i>                                                | 7         |
| <i>S3.2 Modification-Phase</i>                                              | 12        |
| <b>S4 Character information</b>                                             | <b>15</b> |
| <i>S4.1 Imprinting-phase</i>                                                | 15        |
| S4.1.1 Lerte (High-Power/Low-Affiliation, Updating-Avatar)                  | 15        |
| S4.1.2 Hoekenburg (High-Power/Low-Affiliation, Remapping-Avatar)            | 16        |
| S4.1.3 Berger (Low-Power/High-Affiliation, Updating-Avatar)                 | 17        |
| S4.1.4 Karoske (Low-Power/High-Affiliation, Remapping-Avatar)               | 18        |
| <i>S4.2 Modification-Phase (experimental intervention)</i>                  | 19        |
| S4.2.1 Lerte (High-Power/Low-Affiliation, Updating-Avatar)                  | 19        |
| S4.2.2 Hoekenburg (High-Power/Low-Affiliation, Remapping-Avatar)            | 20        |
| S4.2.3 Berger (Low-Power/High-Affiliation, Updating-Avatar)                 | 21        |
| S4.2.4 Karoske (Low-Power/High-Affiliation, Remapping-Avatar)               | 22        |
| <b>S5 Trials/Interactions</b>                                               | <b>23</b> |
| <i>S5.1 Imprinting-phase</i>                                                | 23        |
| S5.1.1 Lerte (High-Power/Low-Affiliation, Updating-Avatar)                  | 23        |
| S5.1.2 Hoekenburg (High-Power/Low-Affiliation, Remapping-Avatar)            | 30        |
| S5.1.3 Berger (Low-Power/High-Affiliation, Updating-Avatar)                 | 37        |
| S5.1.4 Karoske (Low-Power/High-Affiliation, Remapping-Avatar)               | 44        |
| <i>S5.2 Modification-Phase</i>                                              | 51        |
| S5.2.1 Lerte (High-Power/Low-Affiliation, Updating-Avatar)                  | 51        |
| S5.2.2 Hoekenburg (High-Power/Low-Affiliation, Remapping-Avatar)            | 59        |
| S5.2.3 Berger (Low-Power/High-Affiliation, Updating-Avatar)                 | 67        |
| S5.2.4 Karoske (Low-Power/High-Affiliation, Remapping-Avatar)               | 75        |

## S1 Instructions

The following screenshots display the instructions provided digitally to the participants before Imprinting-Phase (testing day 1), Updating/Remapping-phase (testing day 2) and specifically before the memory test on testing day 2.

### S1.1 Imprinting-Phase

Hallo!

Danke, dass Sie an dieser Studie mit der Thematik Bewegung im Sozialen Raum teilnehmen. In dem nun folgenden Experiment verkörpern Sie einen bestimmten Charakter und spielen ihn in einem Rollenspiel. Im Laufe des Experiments treffen Sie dabei auf verschiedene individuelle Charaktere und treten mit Ihnen in Interaktion.

Dabei ist wichtig, dass Sie sich stets Ihrem verkörperten Charakter sowie seiner Beziehung zu den verschiedenen Personen bewusst sind! Entscheiden Sie dementsprechend über Ihre Handlungen.

Leertaste um fortzufahren

Eine Interaktion läuft stets nach dem gleichen Prinzip ab:  
Sie werden mit einer bestimmten Situation konfrontiert und bekommen zwei Handlungsmöglichkeiten zur Auswahl. Im Anschluss müssen Sie sich via Tastatureingabe für eine der Handlungsmöglichkeiten entscheiden.

Durch Bewegen der Maus können Sie sich in der Umgebung umschauchen.

Leertaste um fortzufahren

Merke:  
In den präsentierten Handlungsmöglichkeiten und Dialogen gibt es weder Ironie noch Zynismus. Aussagen sind stets so gemeint, wie sie formuliert sind. Es kann sein, dass Ihnen vorgestellte Charaktere überzogen erscheinen. Dies liegt in diesem Falle daran, dass versucht wurde, Charakterzüge und Persönlichkeitseigenschaften deutlich darzustellen.

Bitte drücken Sie nur dann eine Taste, wenn Sie explizit dazu aufgefordert werden!

Leertaste um zu beginnen

## S1.2 Modification-Phase

Hallo!

Danke, dass Sie an dem zweiten Teil des Experimentes teilnehmen!  
Dieses läuft wie der erste Teil ab. Zur verdeutlichung abermals die wichtigsten Informationen: In dem nun folgenden Experiment verkörpern Sie die selbe Person wie in Teil eins, Richard. Dabei ist wichtig, dass Sie sich stets ihrem verkörperten Charakter sowie seiner Beziehung zu den verschiedenen Personen bewusst sind! Entscheiden Sie dementsprechend über ihre Handlungen.

Leertaste um fortzufahren

Eine Interaktion läuft stets nach dem gleichen Prinzip ab:  
Sie werden mit einer bestimmten Situation konfrontiert und bekommen drei Handlungsmöglichkeiten zur Auswahl. Im Anschluss müssen Sie sich via Tastatureingabe für eine der Handlungsmöglichkeiten entscheiden.

Durch Bewegen der Maus können Sie sich in der Umgebung umschaun.

Leertaste um fortzufahren

Merke:

In den präsentierten Handlungsmöglichkeiten und Dialogen gibt es weder Ironie noch Zynismus. Aussagen sind stets so gemeint, wie sie formuliert sind. Es kann sein, dass Ihnen vorgestellte Charaktere überzogen erscheinen. Dies liegt in diesem Falle daran, dass versucht wurde, Charakterzüge und Persönlichkeitseigenschaften deutlich darzustellen.

Bitte drücken Sie nur dann eine Taste, wenn Sie explizit dazu aufgefordert werden!

Leertaste um zu beginnen

## S1.3 Memory test

In dem nun folgenden Teil des Experimentes sehen Sie eine interaktive Zusammenfassung der Ereignisse und Entscheidungen aus dem vorherigen Teil.

Leertaste um fortzufahren

Dabei werden Ihnen die entsprechenden Situationen präsentiert und Ihnen abwechselnd in der rechten oberen Ecke Ihre gewählte Entscheidung oder nichts präsentiert.

Leertaste um fortzufahren

Fühlen Sie sich abermals in die Situation herein und bestätigen Sie Ihre Auswahl aus Phase 1 durch Drücken der entsprechenden Taste sowohl bei eingblendeter als auch nicht eingblendeter Entscheidung.

Leertaste um zu beginnen

## S2 Avatars and Virtual-environment

### S2.1 Avatars

The avatars used for the experiment were manually created and animated using the program *Adobe Fuse, version 1.0* (<https://www.adobe.com/de/products/fuse.html>). Avatars were matched to the gender and age of the participant. First, one set of young avatars were created for each gender. The corresponding old avatars were created using the same model, but adjusting the 'age' parameter in Adobe Fuse to the maximum. While updating-avatars do not change their appearance from imprinting-phase to updating/remapping-phase, the clothes of remapping-avatars were changed to display a change in social status. As a last step, every avatar was animated, using the 'idle-animation' of Adobe Fuse. As an example, the male young avatars are presented in S4.

### S2.2 Virtual-environment

The landscape of the virtual-environment was manually designed using the environment development tools provided by the program *Unity 3D, version 5.5*. (<https://unity.com>). The 3D-models used for creation of the Virtual-environment were taken from the *Sketchup 3D-warehouse* (<https://www.sketchup.com/products/3d-warehouse>). A list of the model names is attached. For detailed screenshots of the environment, please see 3.

|                               |                               |                           |
|-------------------------------|-------------------------------|---------------------------|
| [2016+train+test]+test+layout | CMan0020-HD2-O01P06-S.skp     | Garden_chair.skp          |
| +2+++trains+v2.skp            | CMan0204-HD2-O01P01-          | Gate+and+Fence.skp        |
| 3D_+MAN.skp                   | S_STD.skp                     | GATTO_SORIANO_SDRAIATO_   |
| 3D_+MAN.skp                   | Component_1-2.skp             | 2.skp                     |
| 3D+Man+7.skp                  | Component_1-3.skp             | Green+House+1.skp         |
| 3d+Man+11.skp                 | Component_1-4.skp             | greenhouse.skp            |
| 3D+People+05.skp              | Component_1.skp               | Greenhouse+Unit 1.skp     |
| 3d+photorealistic+man1.skp    | Component_7[1].skp            | Group_6.skp               |
| 019.skp                       | D45HFR+MBTA.skp               | Group_16.skp              |
| 46x4.skp                      | dave2.skp                     | Group1_1-2.skp            |
| 2002+Tioga+24D.skp            | dave3.skp                     | Group1_1-3.skp            |
| 2010+Dodge+Ram+3500.skp       | de_kat.skp                    | Group1_1-4.skp            |
| 2011+FIAT+DUCATO.skp          | deri+canta 1.skp              | Group1_1.skp              |
| 2011+Smart+Fortwo+W451.sk     | desk+fan.skp                  | Group2_1.skp              |
| p                             | Desk+stuff.skp                | Grupo1_1-2.skp            |
| 2012+Fiat+Palio.skp           | doenninghaus4-2.skp           | Grupo1_1.skp              |
| AldiEarth2.skp                | doenninghaus4-2.skp           | GS32ra_V20a.skp           |
| Arentsburgh.skp               | doenninghaus4-2~.skp          | hardenberstr(2).skp       |
| Arentsburghlaan_1.skp         | Dog_4p1.skp                   | Haus_V07c_nl.skp          |
| audi_A4.skp                   | Dorfkoppel.skp                | haus1big.skp              |
| AutoSave_2104.skp             | Duck-Pintail-                 | haus1small.skp            |
| benzinkanister.skp            | Drake[SKU_CFTT1084].skp       | haus2big.skp              |
| Big+Red+Urban+House.skp       | Duck-Pintail-                 | haus2small.skp            |
| bmw.skp                       | Hen[SKU_CFTT1085].skp         | Hedge+01-01.skp           |
| BoxesEtc01.skp                | Electronics_Black-Desktop-    | Hedge+01-05.skp           |
| Briefkasten_modern.skp        | Telephone.skp                 | HM101.skp                 |
| Burgdorf.skp                  | Envelope 1.skp                | HM102.skp                 |
| bus+2.skp                     | ESCRITORIO+02.skp             | hoekenburg büro.skp       |
| Busstop.skp                   | F.skp                         | Hoekenburg.skp            |
| caja_carton.skp               | fan.skp                       | Honda+Prelude+Part+1.skp  |
| cart+return.skp               | Fiat+500.skp                  | hotelAzurLjubljana_v1.skp |
| Caterpilare+Chargeur.skp      | File_Kia_Carnival_LX_2011.skp | House-3.skp               |
| Cats 1.skp                    | File_Kia_Carnival_LX_2012.skp | House-3.skp               |
| chiesa+bodega+3.skp           | File_Subaru_Forester.skp      | House-4.skp               |
| chiesa+bodega+3.skp           | flat+screen+tv+2.9.16.skp     | house+finish.skp          |
| CMan0011-HD2-O01P06-S.skp     | forklift.skp                  | House01.skp               |

House03.skp  
ICE+2.skp  
JekPol+Chair.skp  
La+Mamy.skp  
Lagarto+(Helodermatidae).skp  
lao+lambieng.skp  
laptop+32.skp  
leader+book 1.skp  
lerte.skp  
lobby.skp  
LOLY.skp  
LUCAS\_C.skp  
luke.skp  
lux+boat.skp  
lux+boat.skp  
magazines 1.skp  
mailbox 1.skp  
mailbox~.skp  
Male03\_b.skp  
maleta 1.skp  
ManCassual2.skp  
MANKN.skp  
Mercedes-  
Benz+CLS+350+CDI+W218+20  
12.skp  
Mercedes+Benz+SLS+AMG.skp  
Milos+-+Yacht34.skp  
MINI+Cooper+S+Mk+1+2005.s  
kp  
MiniCooper+Low+Poly.skp  
mnknnn.skp  
Modern+planters.skp  
motelroom.skp  
MTC+Bus+GE.skp  
Mulher+3D+Caminhando+-  
+Aarquiteta.skp  
mutfak+kaplı.skp  
Newt.skp

ngưòi.skp  
Ortsschild\_Remshart 1.skp  
Park's+Bistro+&+Wine+Bar+Ex  
terior.skp  
PC\_5thW101.skp  
Pens\_02.skp  
pixel.skp  
plattenbau+bahnhof.skp  
Porsche+911+Turbo+82+.skp  
Postkasten2.skp  
Power+yacht.skp  
raised+bed.skp  
Retail\_Shopping-Cart.skp  
Road+01.skp  
rotary+clothes+line.skp  
RS5\_V13b.skp  
rund+pavillon+-+holz.skp  
s15.skp  
Sans+titre.skp  
SeeSawRaymondPark.skp  
Sem+nome.skp  
Senza-2.skp  
Senza.skp  
ShirleyWilliams.skp  
Shop+truck,+years+later.skp  
skp56F0.skp  
skpDA54.skp  
Sold sign.skp  
Stan.skp  
stone+table.skp  
Stone+wall+04-01.skp  
Stone+wall+04-05.skp  
SULO\_MGB\_120.skp  
SULO\_MGB\_1100.skp  
supermarket furnished.skp  
supermarket.skp  
Teresa.skp  
test+train+5.skp

Thomas.skp  
tormods+cabin.skp  
Tower+Crane.skp  
Track+Hoe.skp  
tuinvleugel\_oost.skp  
Turner+Trailer.skp  
Unbenannt-3.skp  
Unbenannt-4.skp  
Unbenannt.skp  
Unbenannt.skp  
Unna,\_Telefonzelle-  
kamener\_Strae[2].skp  
Untitled 1.skp  
Untitled-2.skp  
Untitled-2.skp  
Untitled-3.skp  
Untitled-3.skp  
Untitled-3.skp  
Untitled-4.skp  
Untitled-5.skp  
Untitled.skp  
vectra\_c.skp  
VEO+800+MILELE+SE.skp  
volvo2.skp  
VW+Golf+II+GTI 1.skp  
W202+Sport.skp  
waste+basket.skp  
WindmuehleEtelsen\_V02a.skp  
WoodenJetty.skp  
WoodenJetty.skp  
WoodenJettyWhite.skp  
YBCVTPOEOPLE#8.skp  
YBCVTPOEOPLE#10.skp  
YBCVTPOEOPLE#21.skp  
YBCVTPOEOPLE#23.skp  
YBCVTPOEOPLE#31.skp  
ZBpM+-  
+Beetle+Convertible.skp

### S3 Backstory and presentation of the virtual-environment (Dollstedt)

At the beginning of the Imprinting-Phase, the backstory of the impersonated avatar was presented in an interactive way, allowing the participants to get used to the controls of the experiment. The participants impersonate a person that inherited a house in it's hometown called 'Dollstedt' and decides to travel there. On arrival, the virtual environment ('Dollstedt'), was presented.

#### S3.1 Imprinting-phase

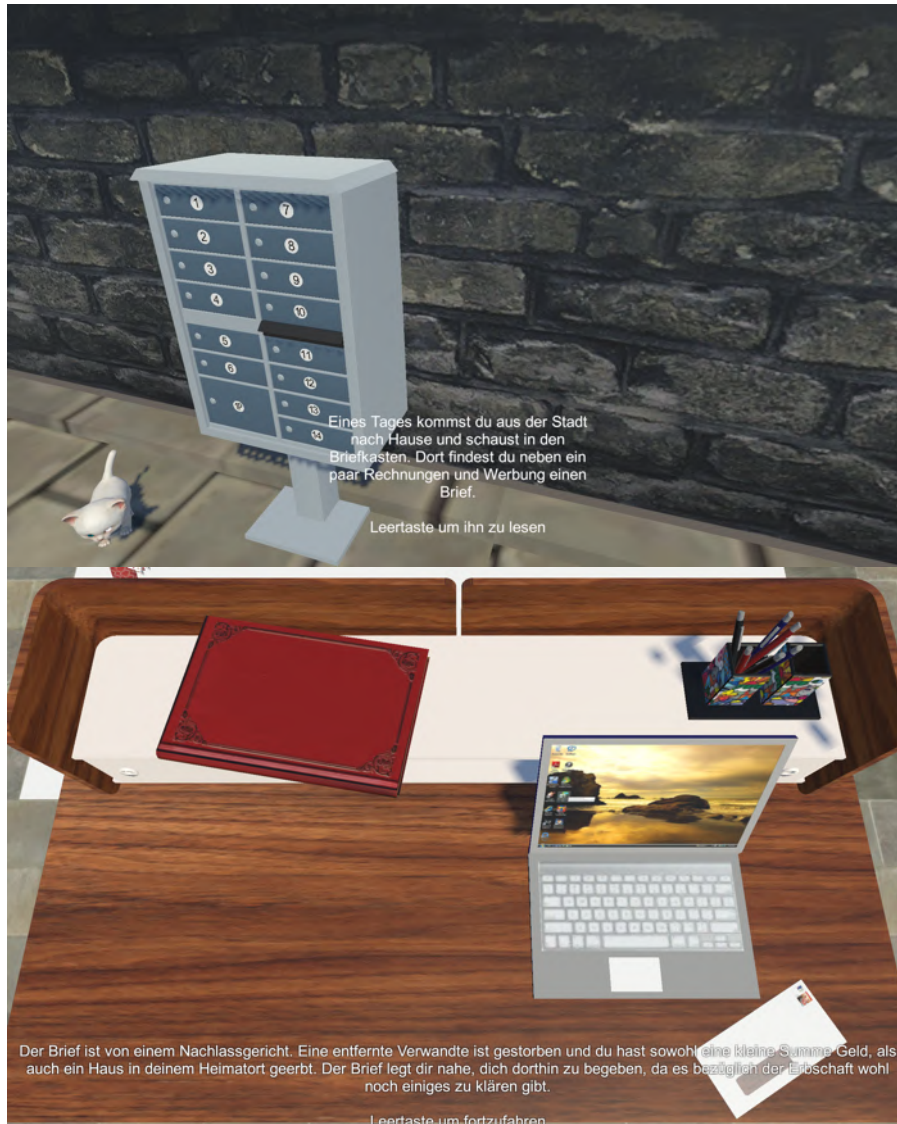

Der Tod deiner Verwandten beschäftigt dich, du freust dich aber, wieder in deinen Heimatort zu kommen! Daher beschließt du, dir erst mal etwas zu trinken zu machen, bevor du mit dem Packen anfängst.

Was machst du?

- 1) Du machst dir einen Kaffee
- 2) Ein Glas Wasser ist genau das Richtige
- 3) Du setzt einen Tee auf

Drücke die entsprechende Zahl!

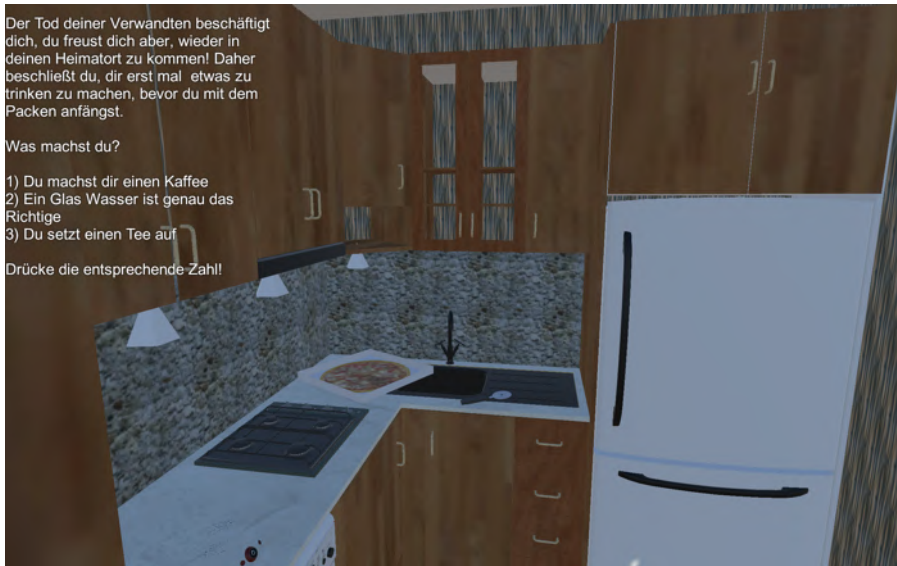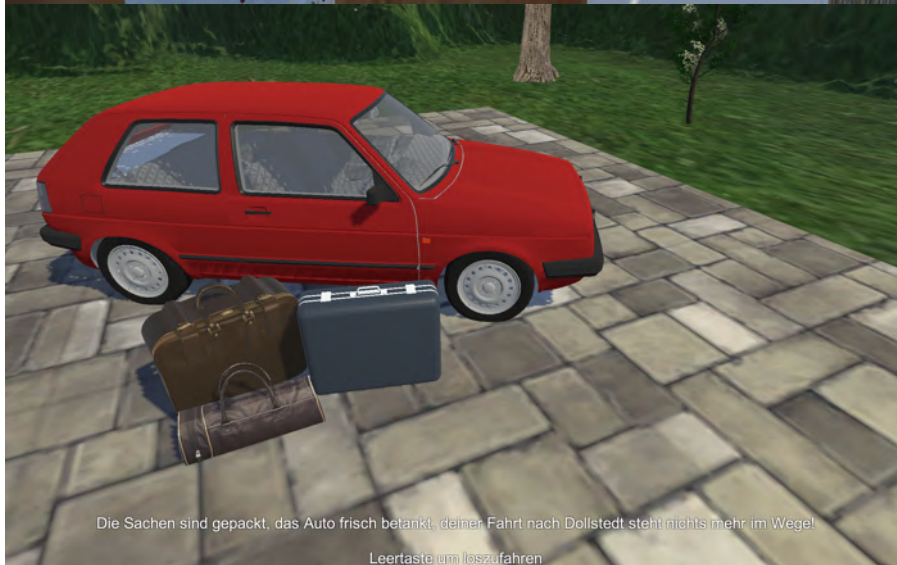

Die Sachen sind gepackt, das Auto frisch betankt, deine Fahrt nach Dollstedt steht nichts mehr im Wege!

Leertaste um loszufahren

Nach einigen Stunden Fahrt kommst du schließlich am Ziel an und siehst das Ortsschild von Dollstedt vor dir!

Leertaste um fortzufahren

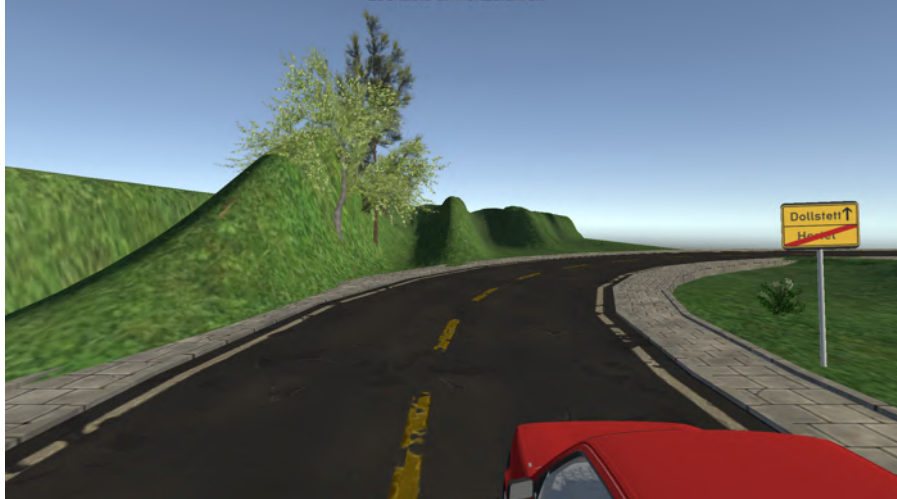



Dollstedt, deine Heimatstadt!

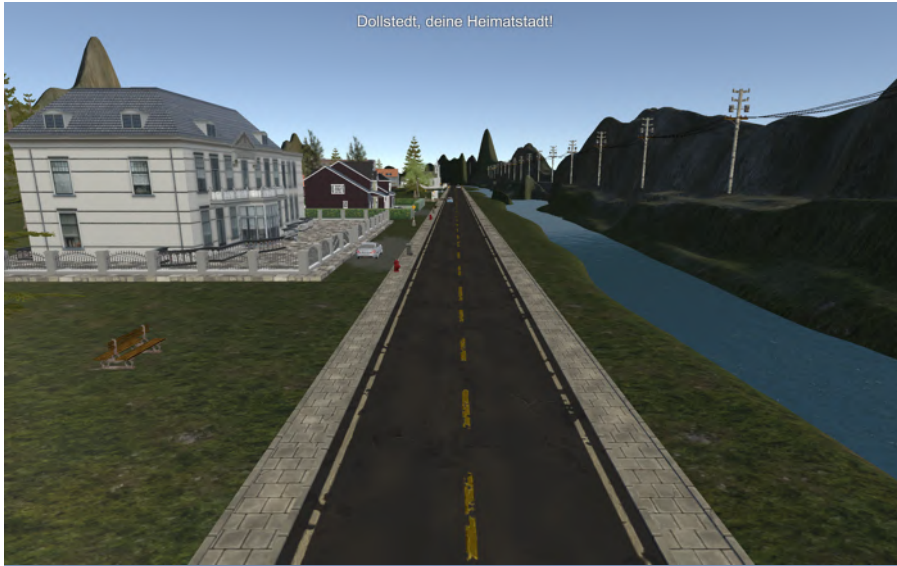

Dollstedt, deine Heimatstadt!

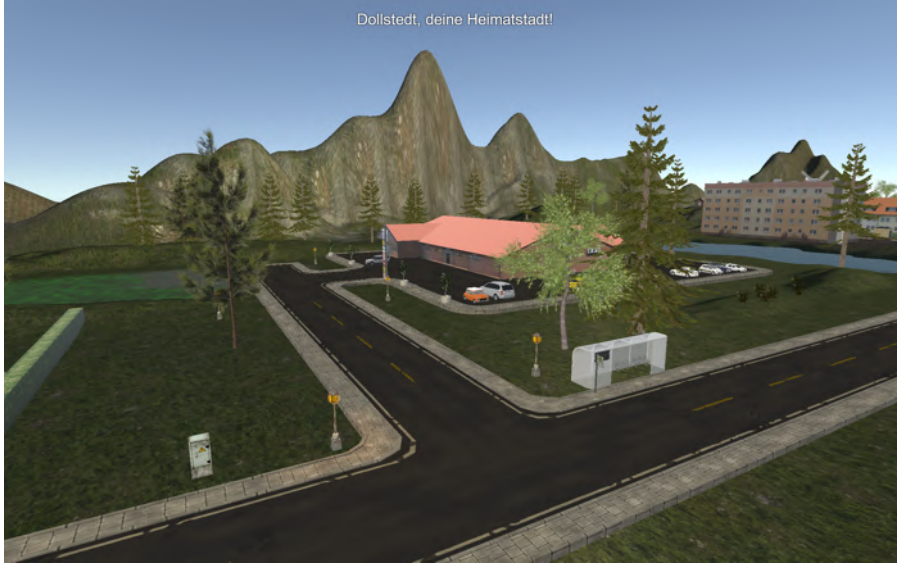

Dollstedt, deine Heimatstadt!

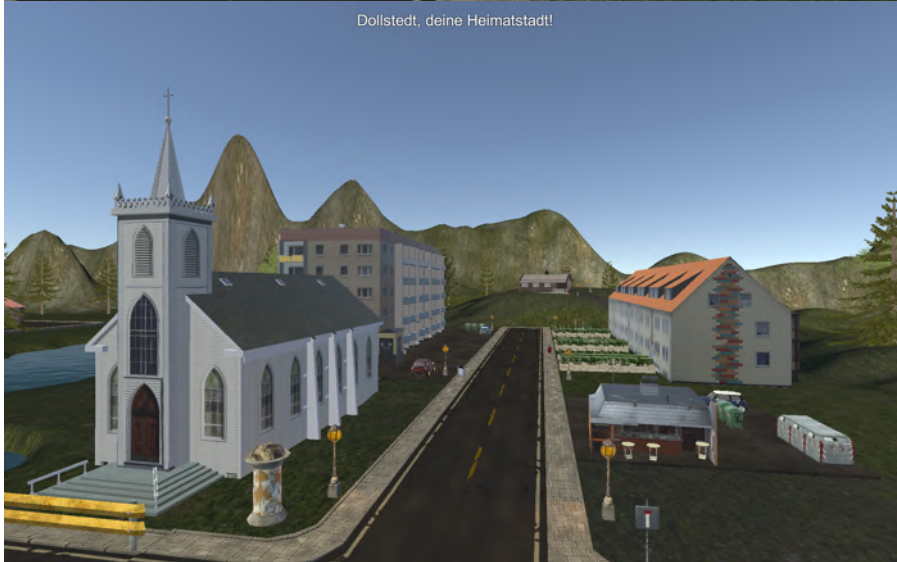

Dollstedt, deine Heimatstadt!

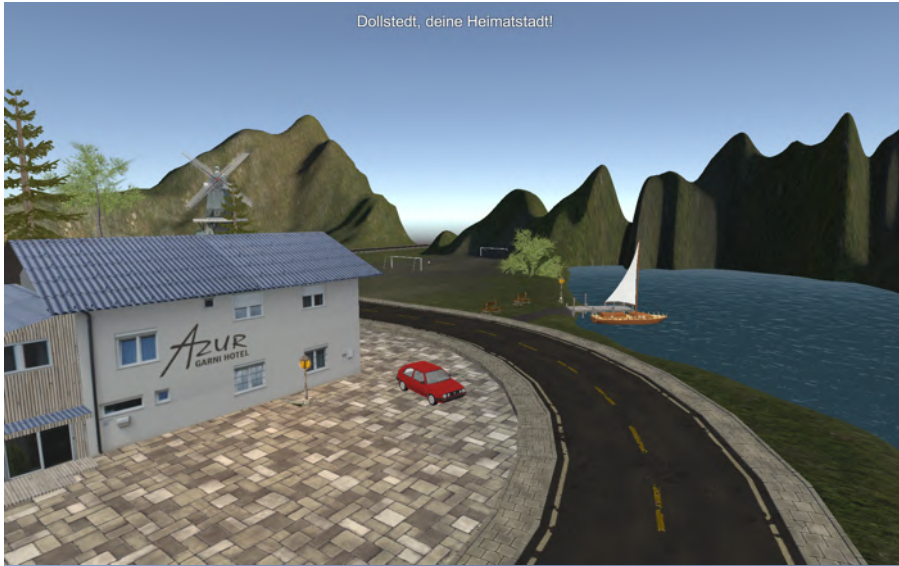

Dollstedt, deine Heimatstadt!

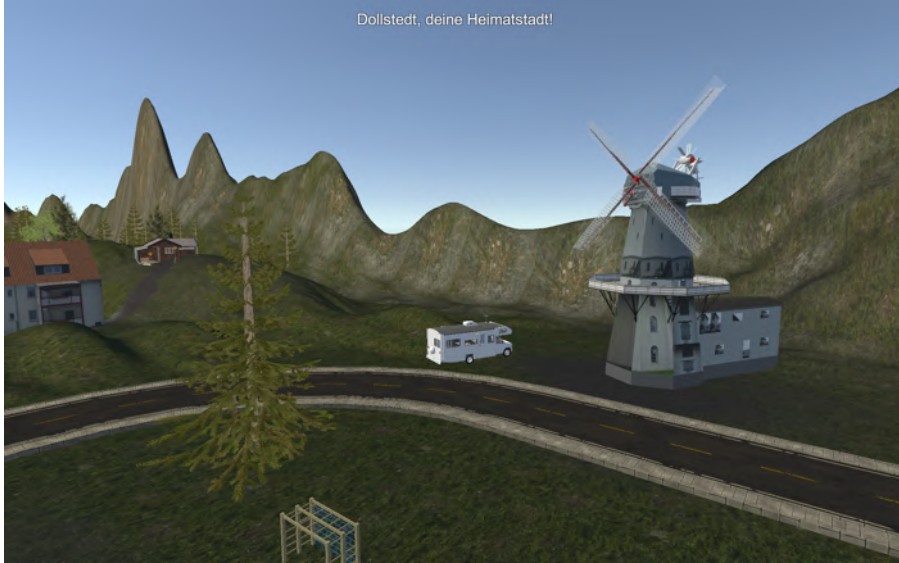

Dollstedt, deine Heimatstadt!

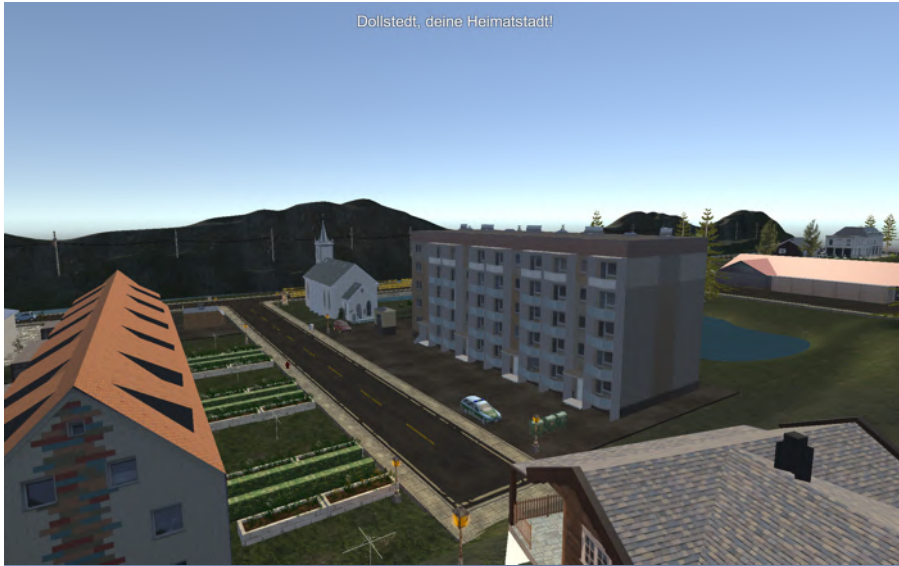

Zum Glück gibt es noch das kleine Hotel. Welches Zimmer möchtest du?

- 1) 101
- 2) 201
- 3) 301

Drücke die entsprechende Nummer um auf dein Zimmer zu gehen!

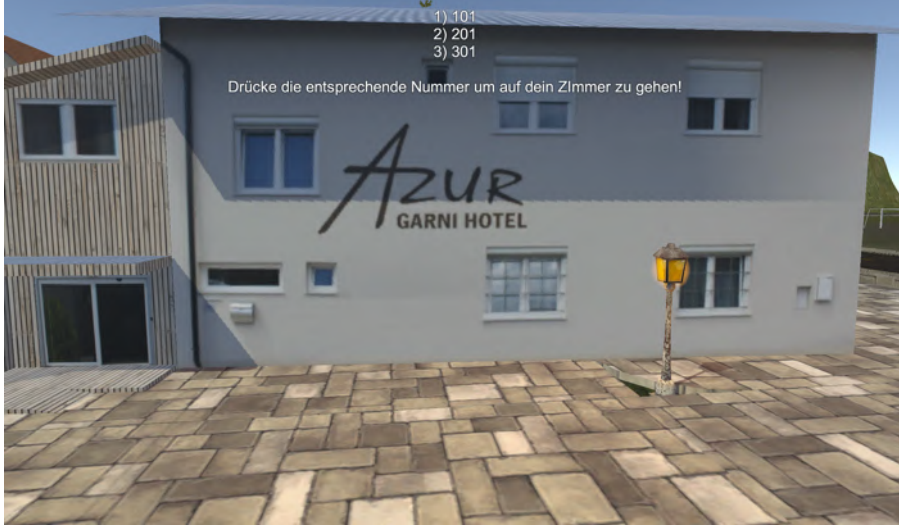

### S3.2 Modification-Phase

At the beginning of the Modification-Phase, the backstory of testing-day-2 was provided: Two years have passed and the avatar decided to travel back to Dollstedt. On arrival, changes of the virtual environment were presented. Changes of the virtual environment resembled changes of the interaction avatars (e.g. a high-power/low-affiliation avatar was modified to low-power/high-affiliation in Modification-Phase and had to sell his/her villa).

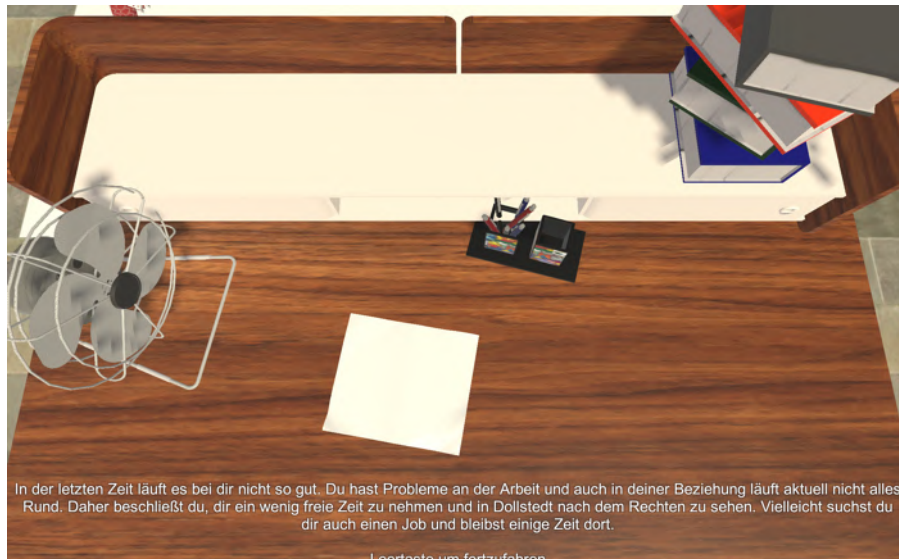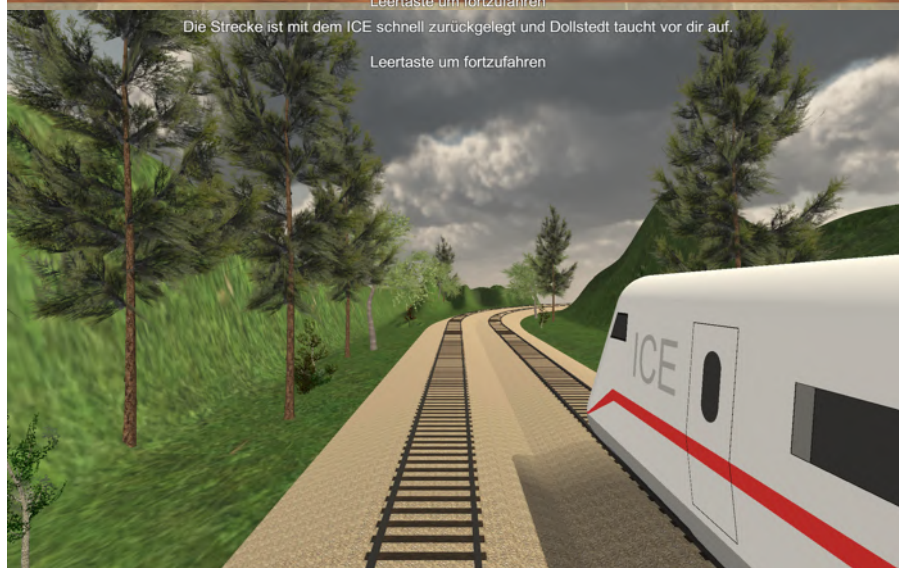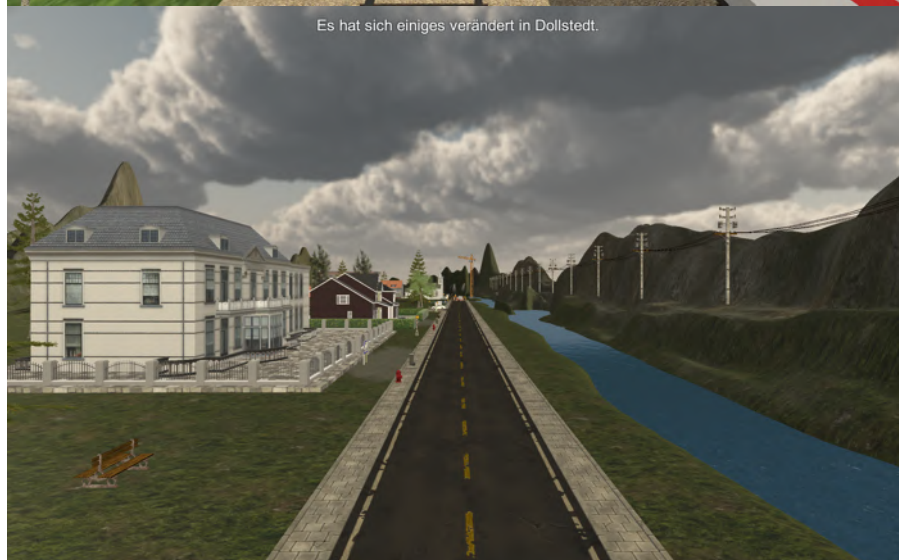

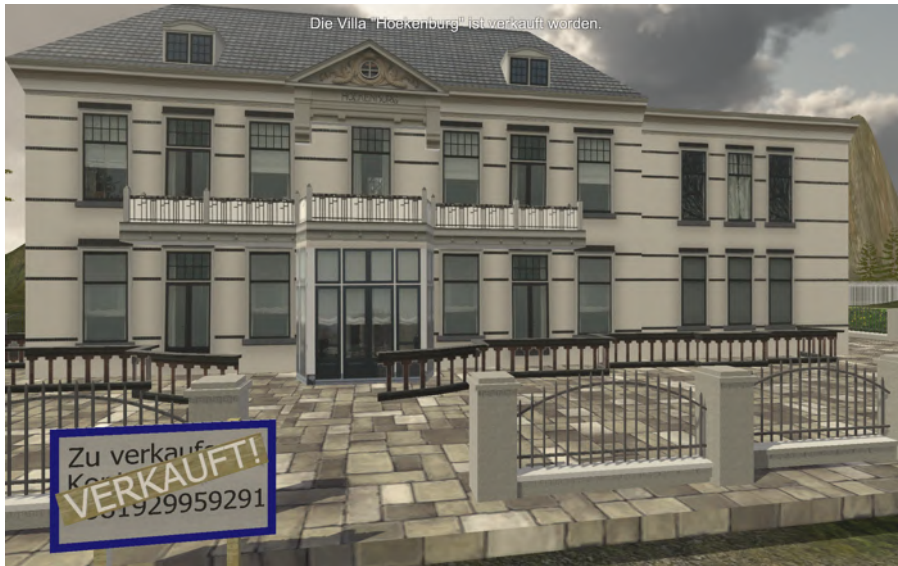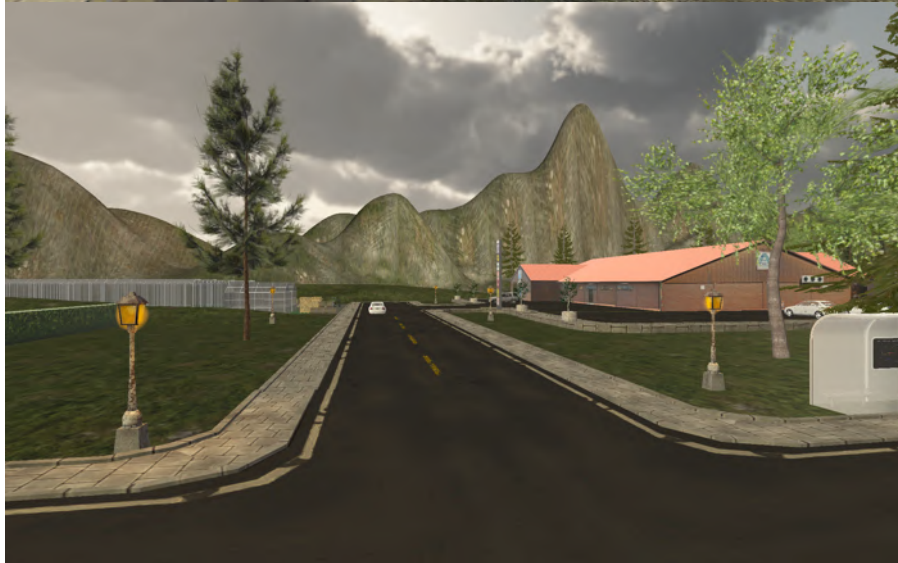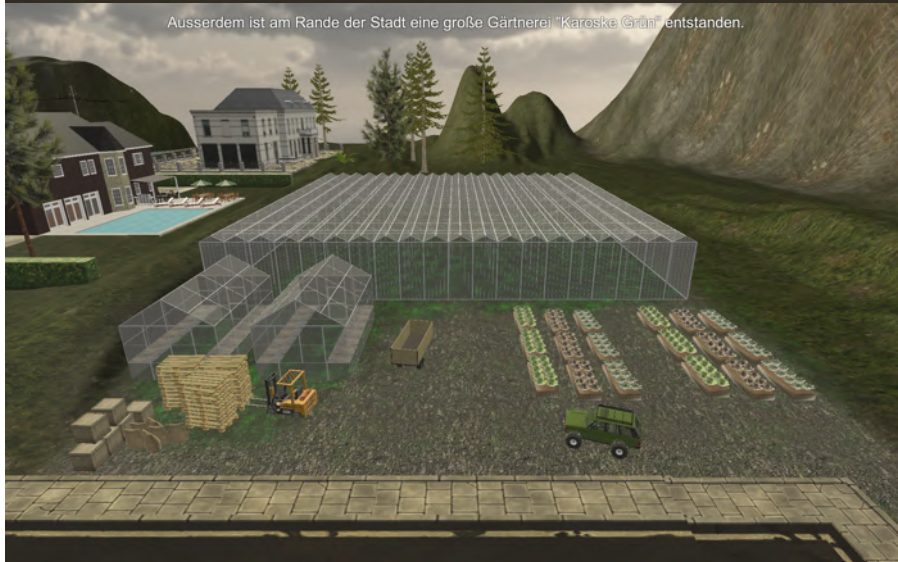

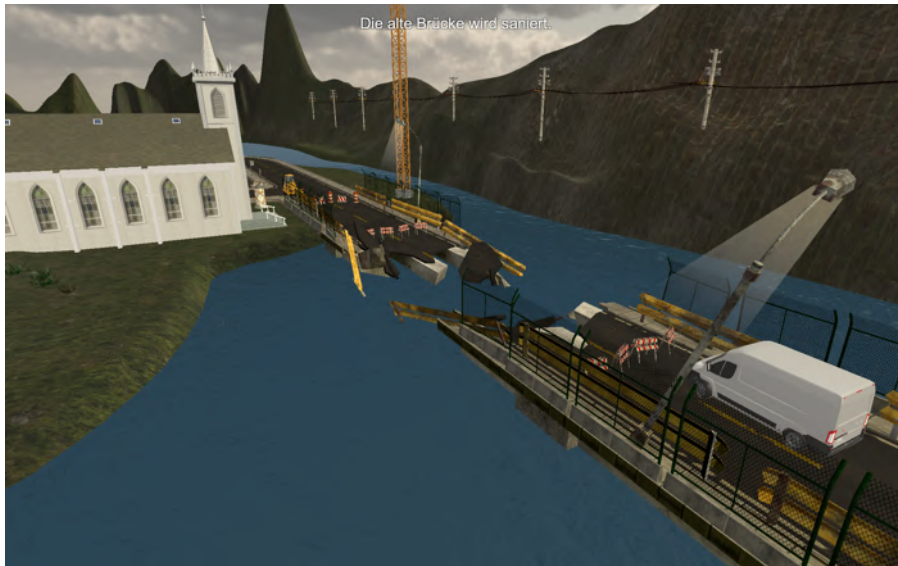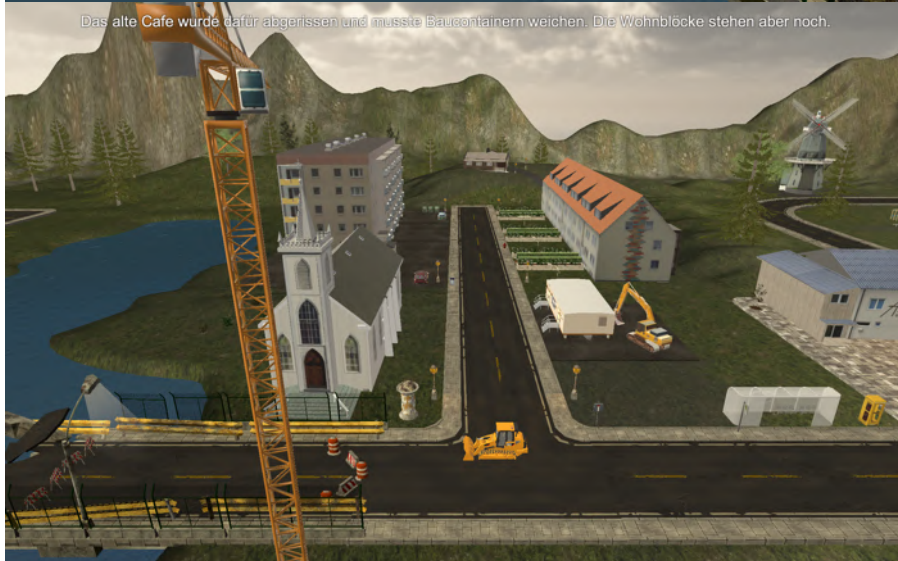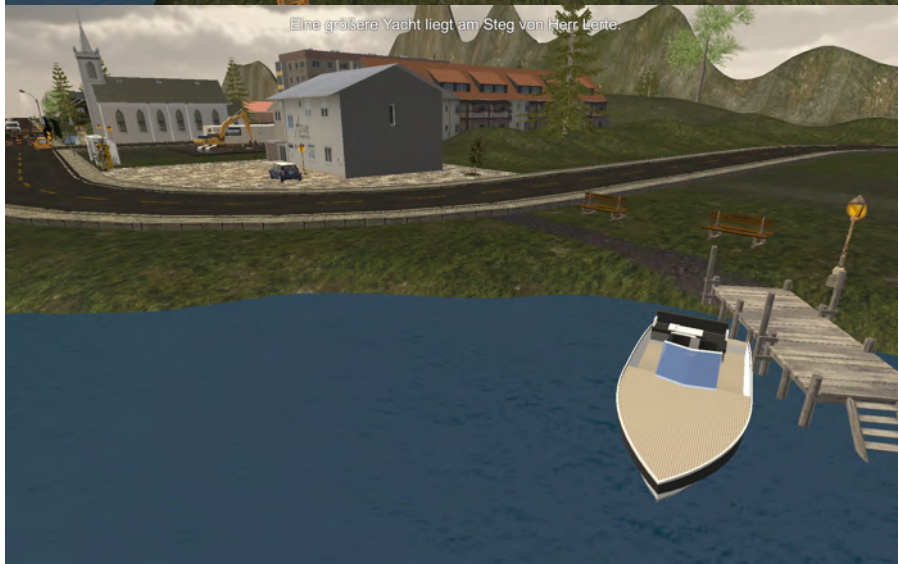

## S4 Character information

In both phases, participants were provided information on the respective avatar at the beginning of a block of interactions/trials. While information on Updating-Avatars was consistent from Imprinting- to Modification-Phase, participants were provided conflicting information on Remapping-Avatars.

### S4.1 Imprinting-phase

#### S4.1.1 Lerte (High-Power/Low-Affiliation, Updating-Avatar)

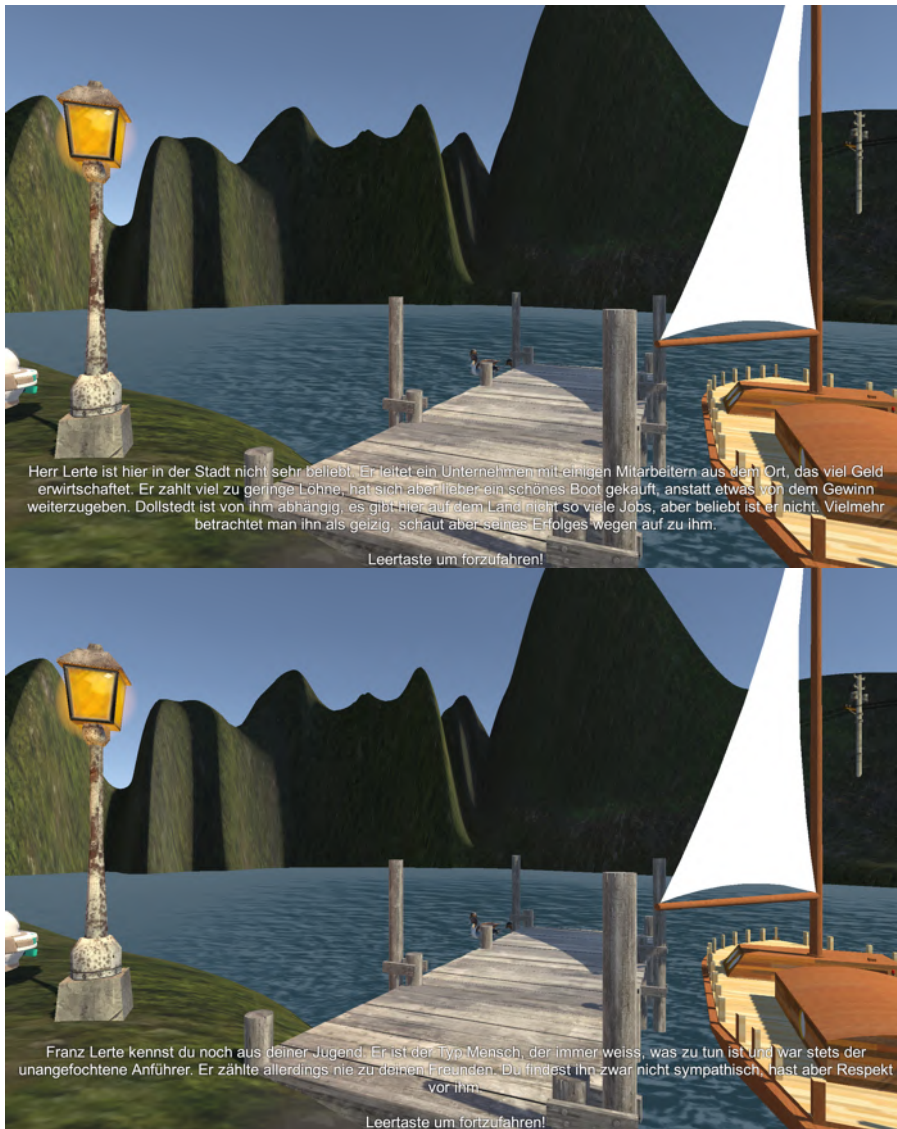

### S4.1.2 Hoekenburg (High-Power/Low-Affiliation, Remapping-Avatar)

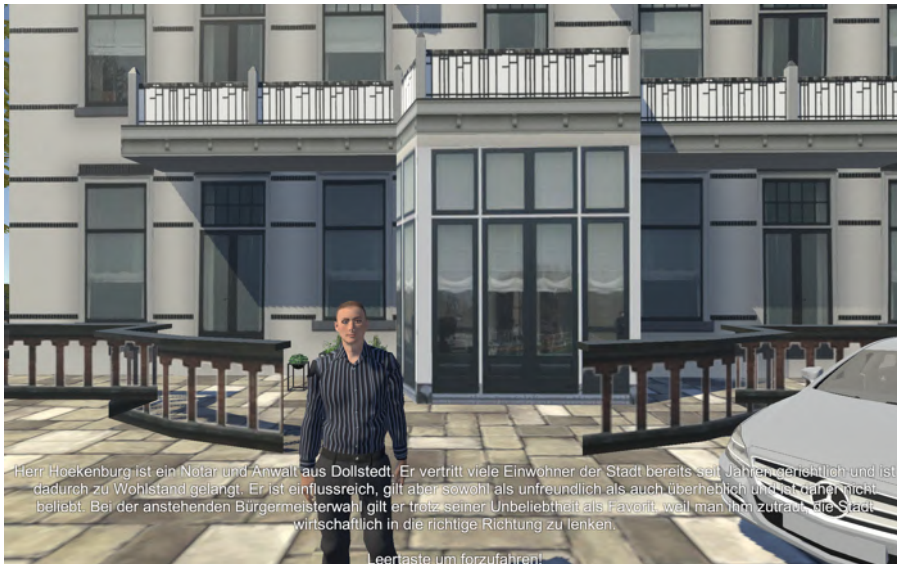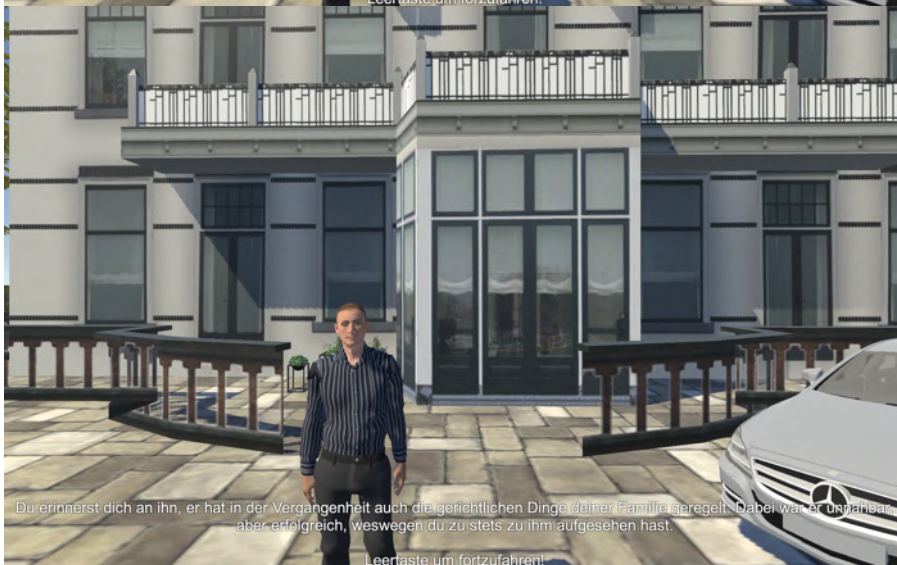



### S4.1.3 Berger (Low-Power/High-Affiliation, Updating-Avatar)

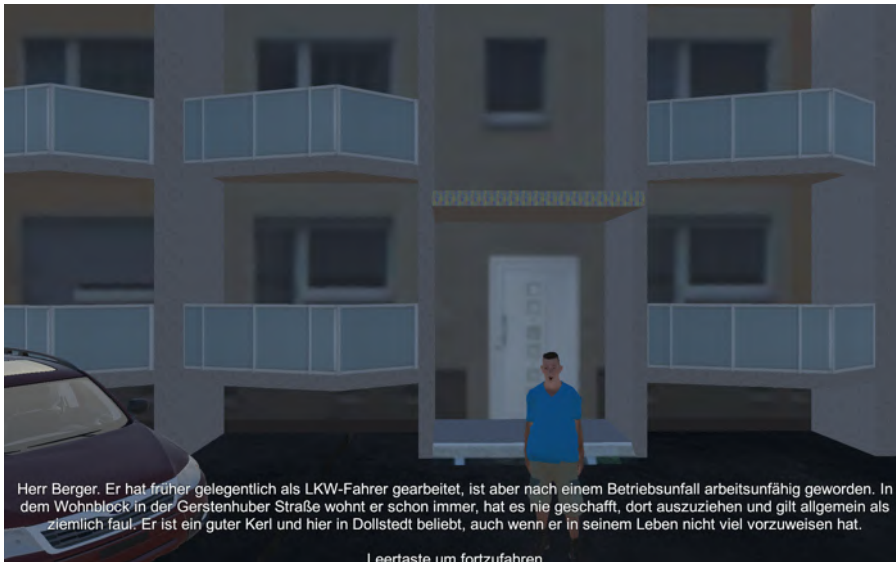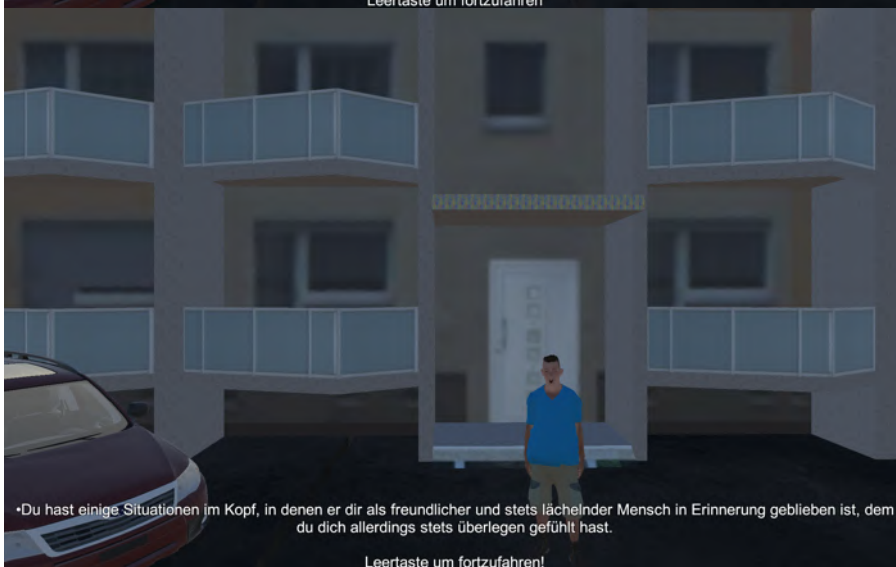

#### S4.1.4 Karoske (Low-Power/High-Affiliation, Remapping-Avatar)

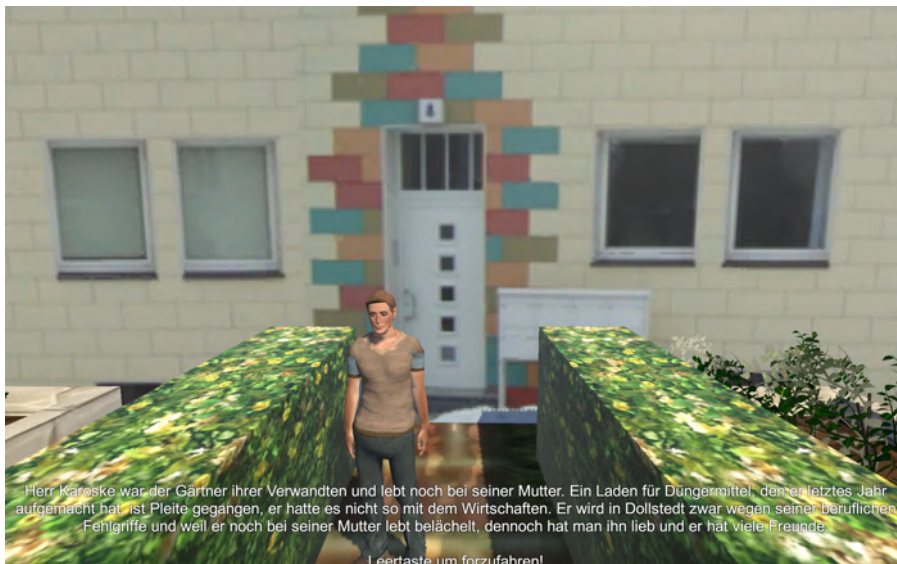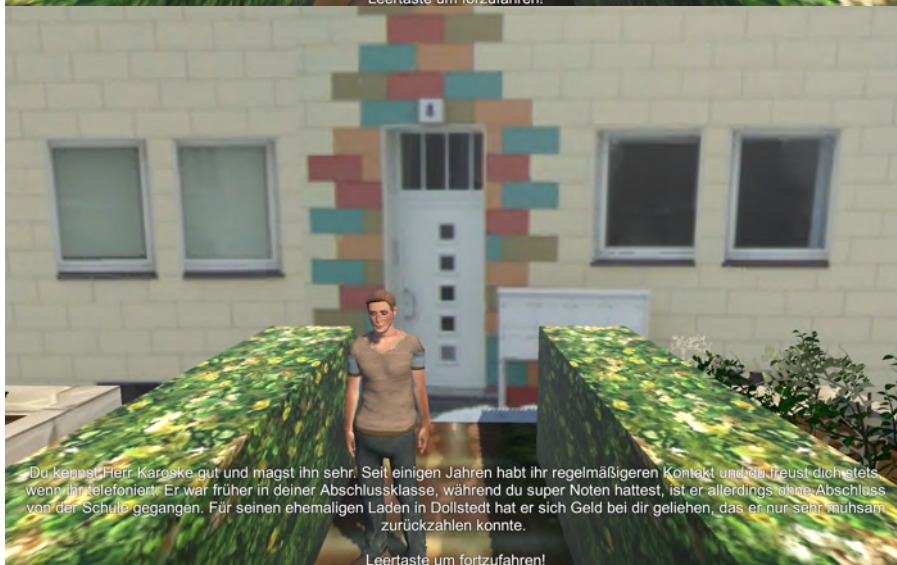

## S4.2 Modification-Phase (experimental intervention)

### S4.2.1 Lerte (High-Power/Low-Affiliation, Updating-Avatar)

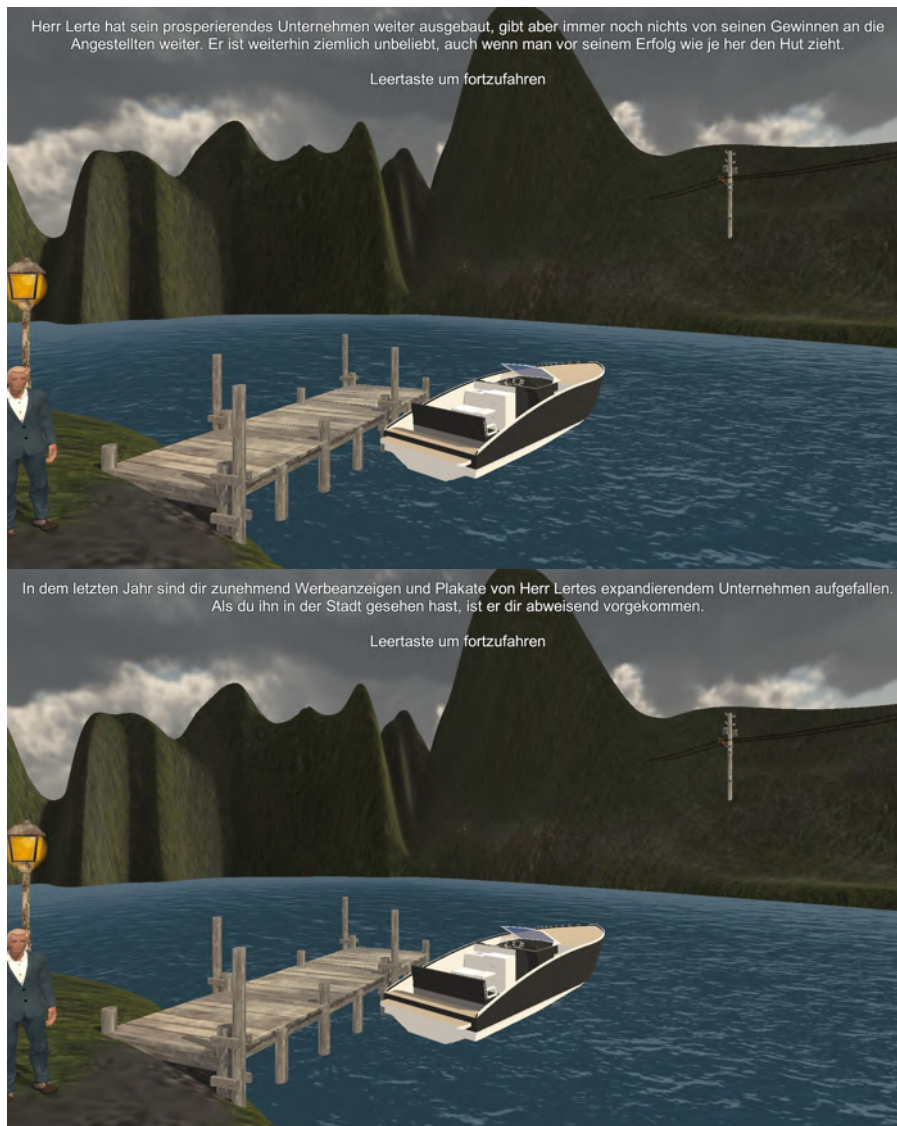

## S4.2.2 Hoekenburg (High-Power/Low-Affiliation, Remapping-Avatar)

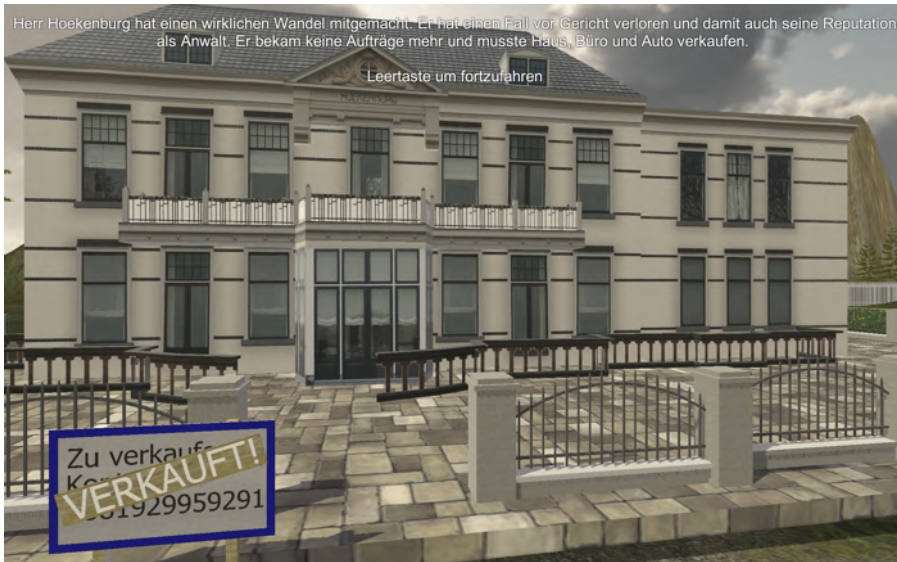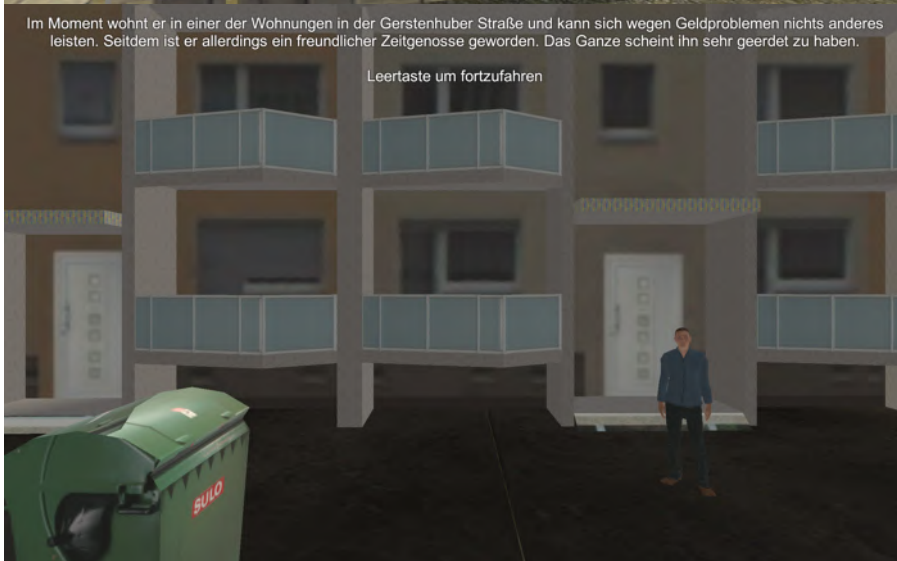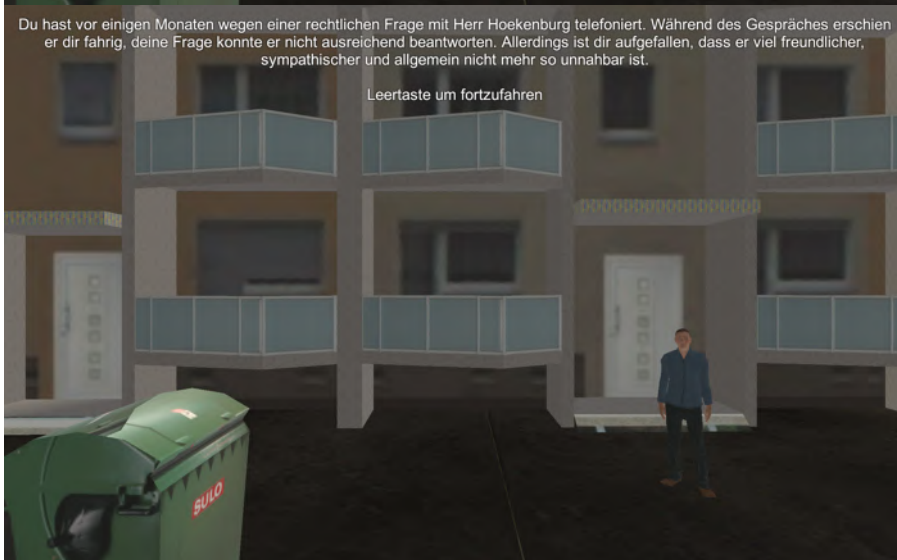

### S4.2.3 Berger (Low-Power/High-Affiliation, Updating-Avatar)

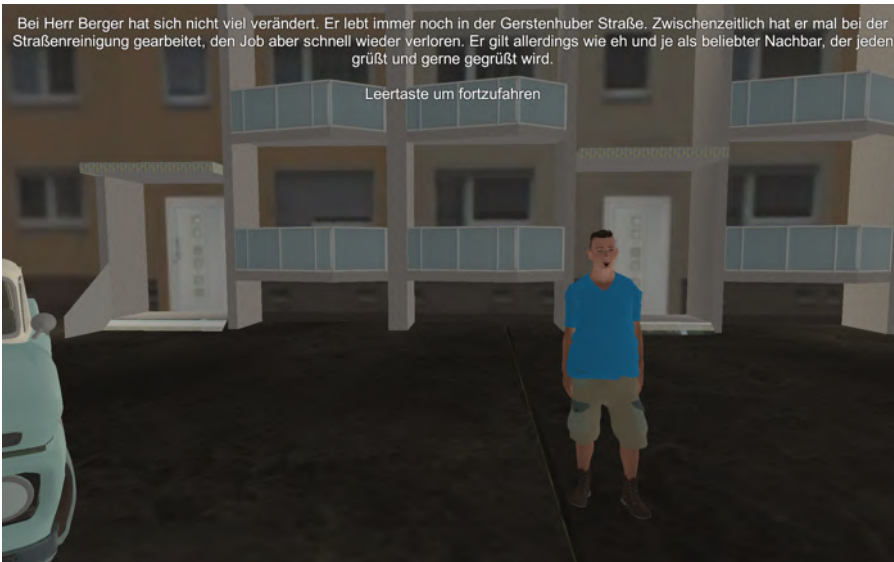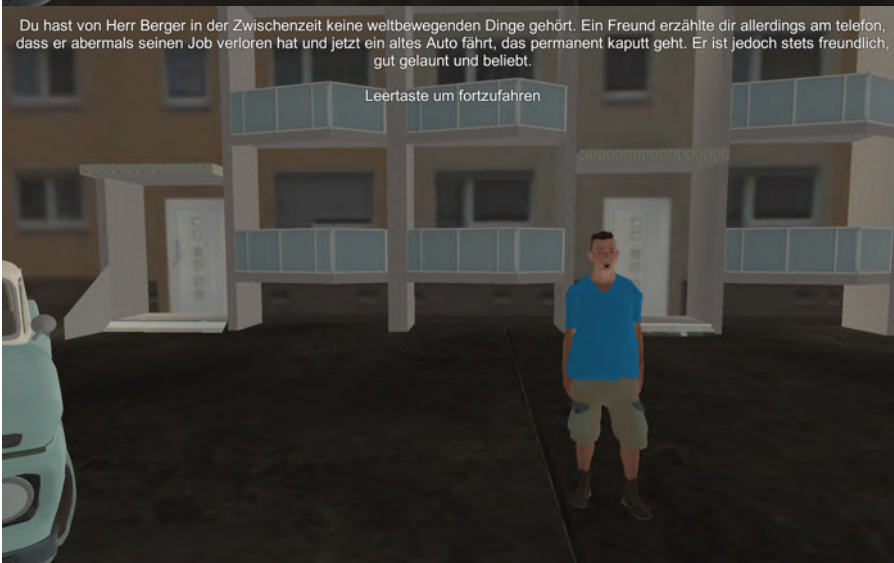

## S4.2.4 Karoske (Low-Power/High-Affiliation, Remapping-Avatar)

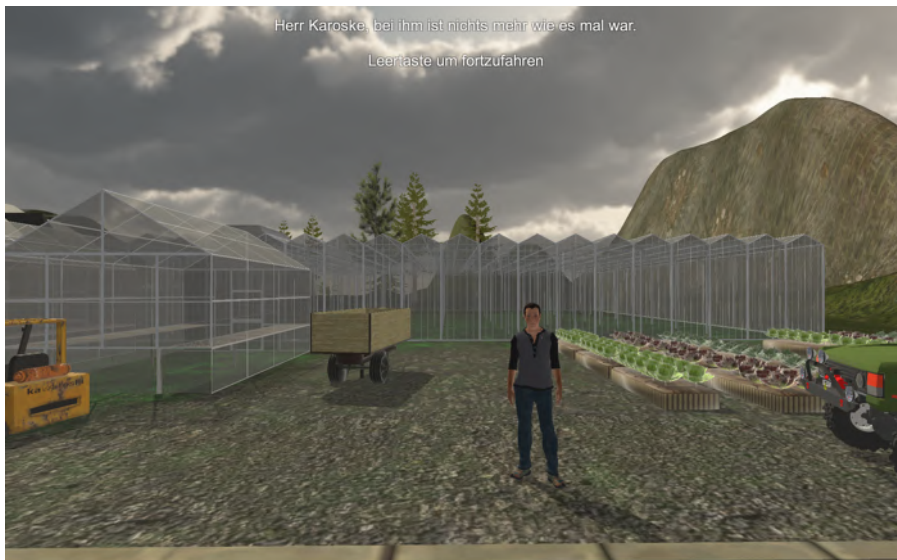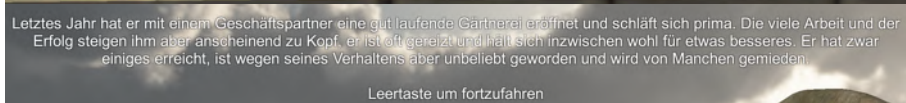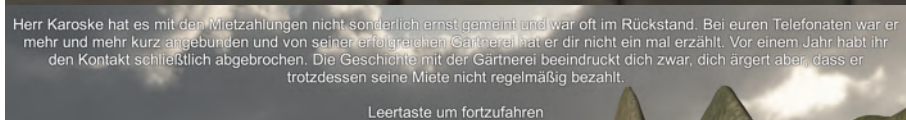

## S5 Trials/Interactions

The following screenshots display the different interactions with each avatar in Imprinting- as well as Updating/Remapping-Phase. Narratives used to develop the storyline and increase immersion are not included.

### S5.1 Imprinting-phase

#### S5.1.1 Lerte (High-Power/Low-Affiliation, Updating-Avatar)

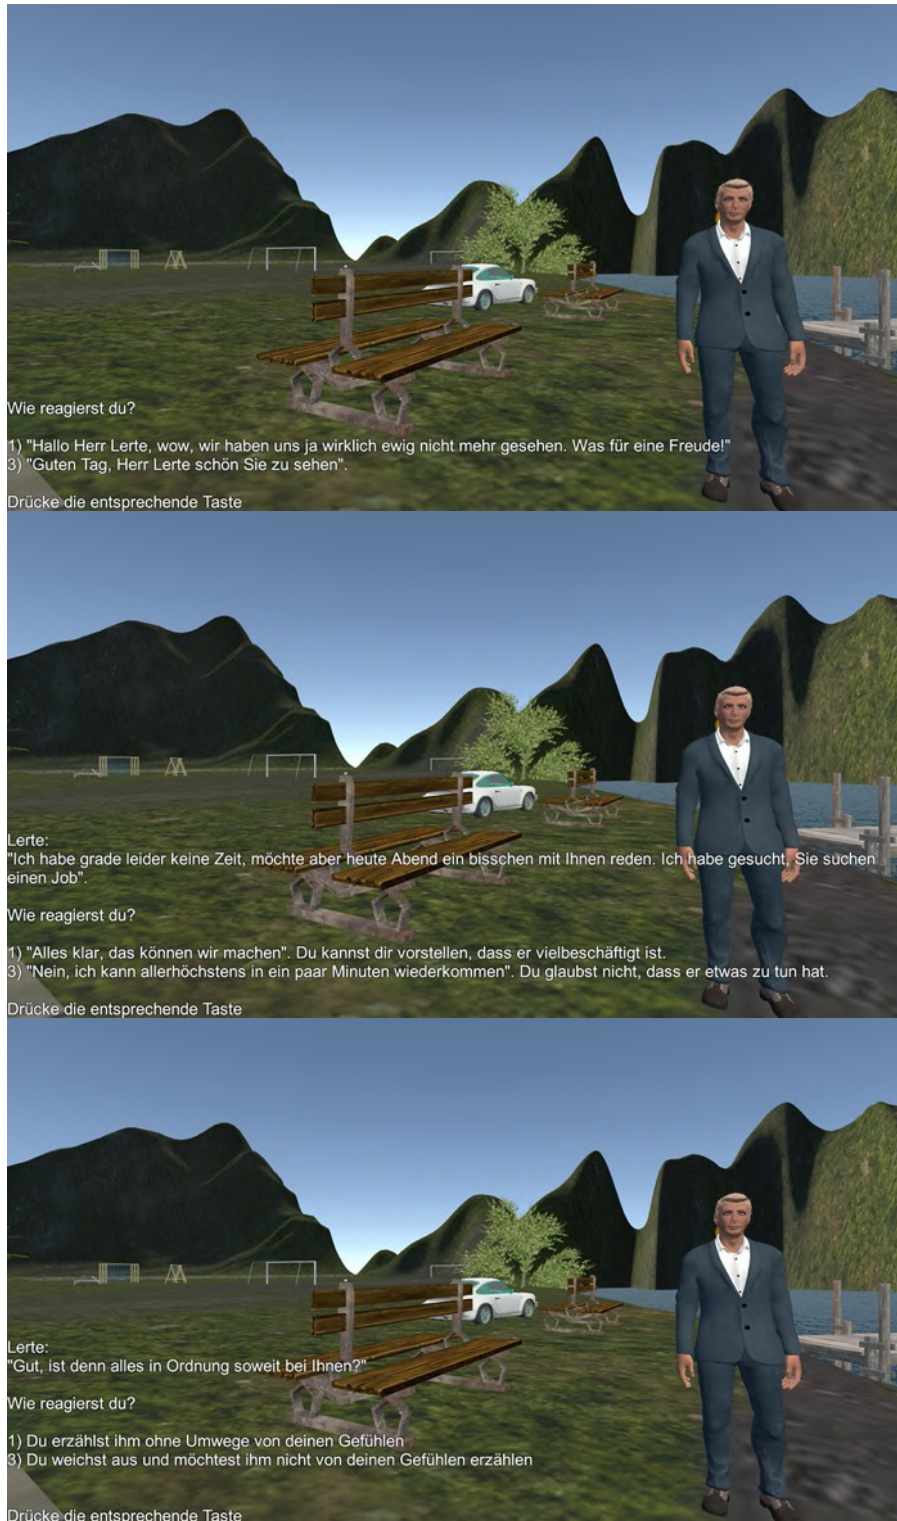

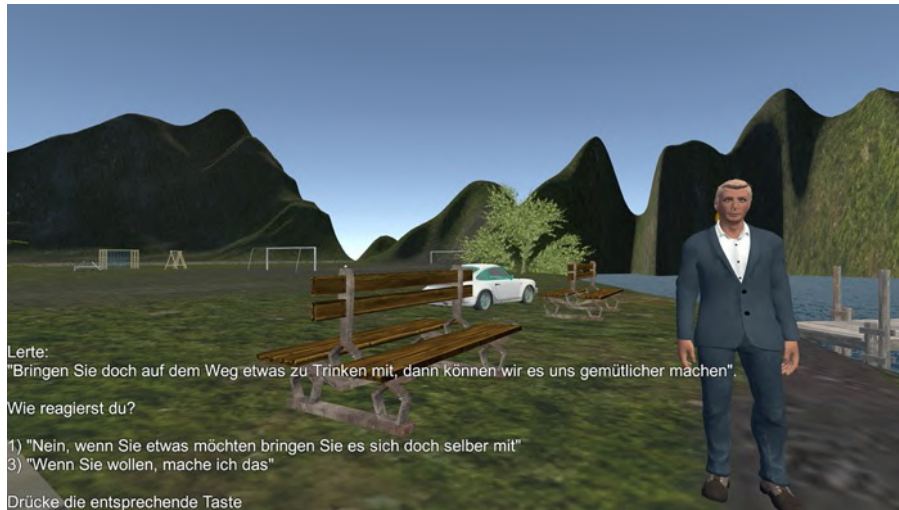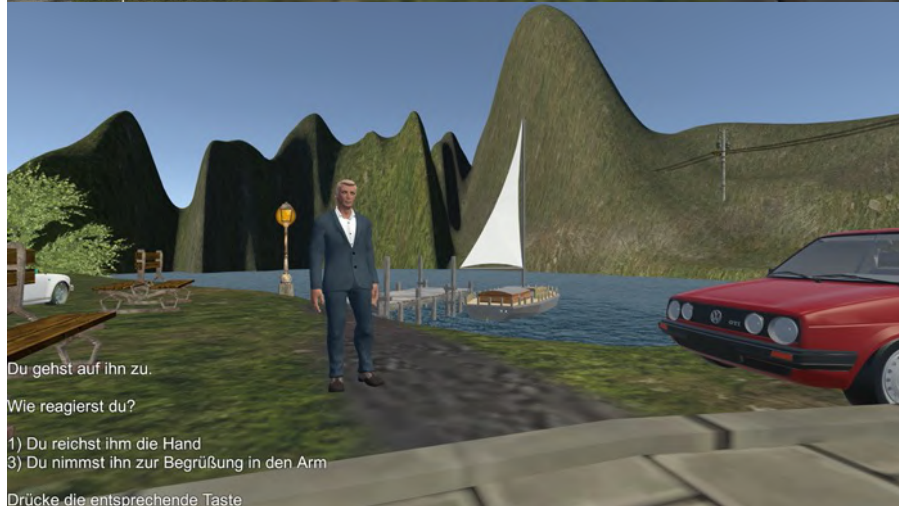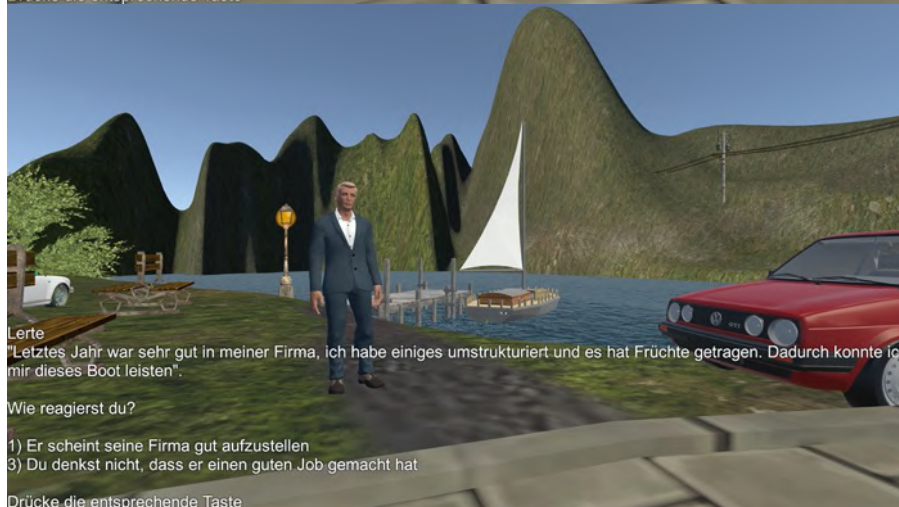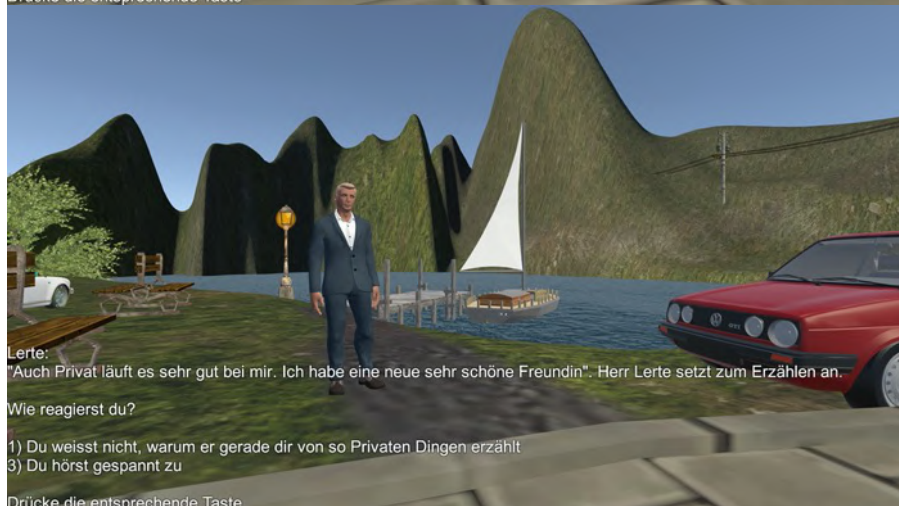



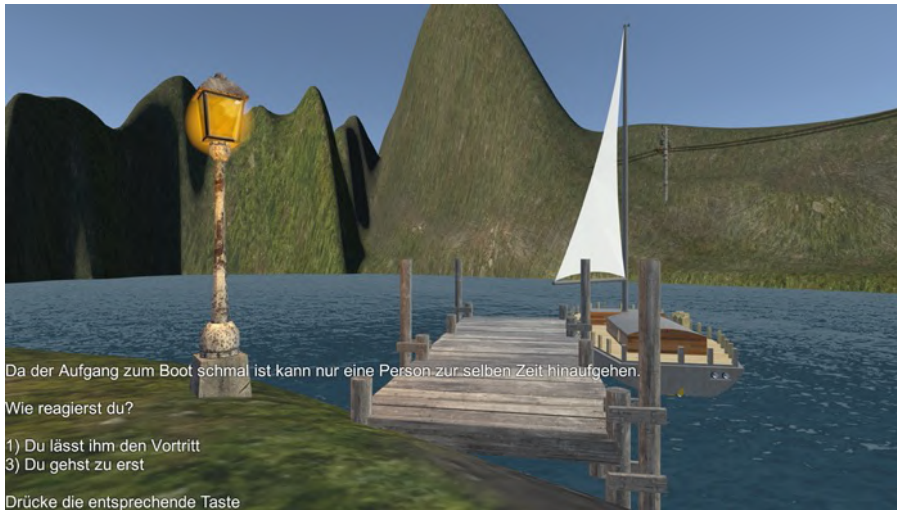

Da der Aufgang zum Boot schmal ist kann nur eine Person zur selben Zeit hinaufgehen.

Wie reagierst du?

- 1) Du lässt ihm den Vortritt
- 3) Du gehst zu erst

Drücke die entsprechende Taste

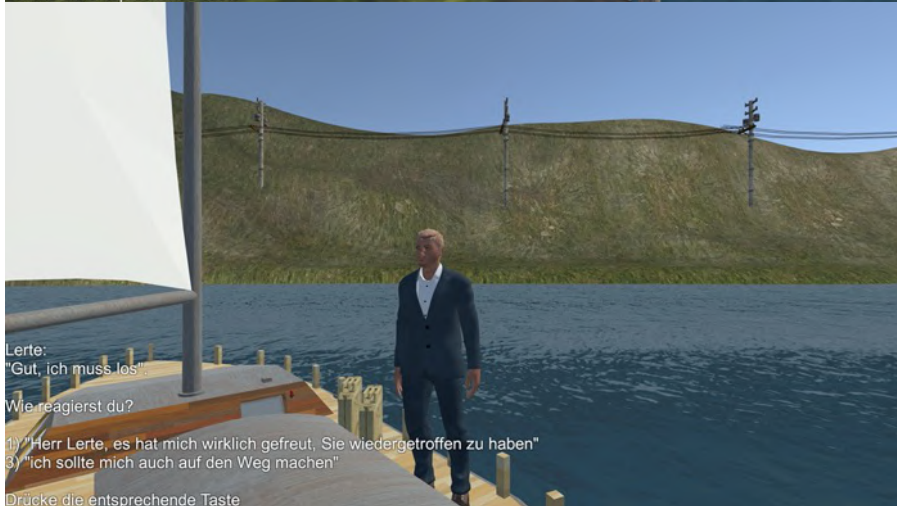

Lerte:  
"Gut, ich muss los!"

Wie reagierst du?

- 1) "Herr Lerte, es hat mich wirklich gefreut, Sie wiedergetroffen zu haben"
- 3) "ich sollte mich auch auf den Weg machen"

Drücke die entsprechende Taste

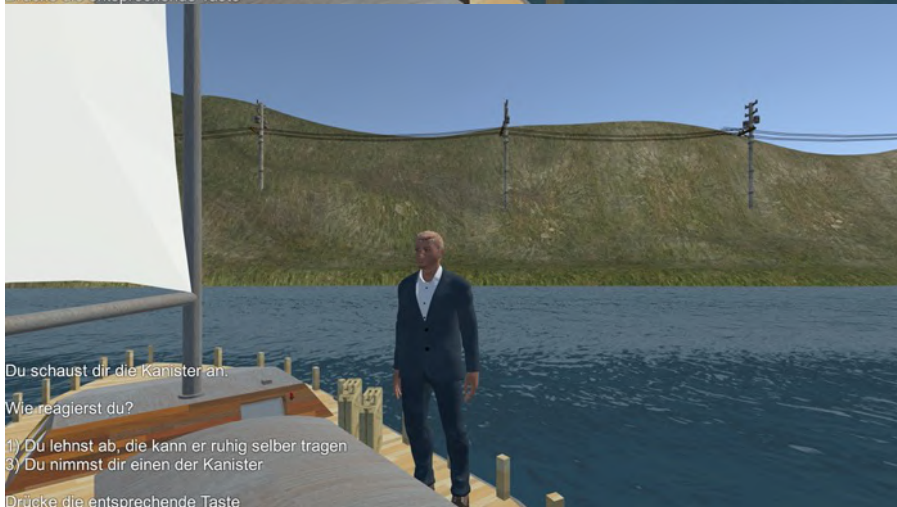

Du schaust dir die Kanister an.

Wie reagierst du?

- 1) Du lehnst ab, die kann er ruhig selber tragen
- 3) Du nimmst dir einen der Kanister

Drücke die entsprechende Taste

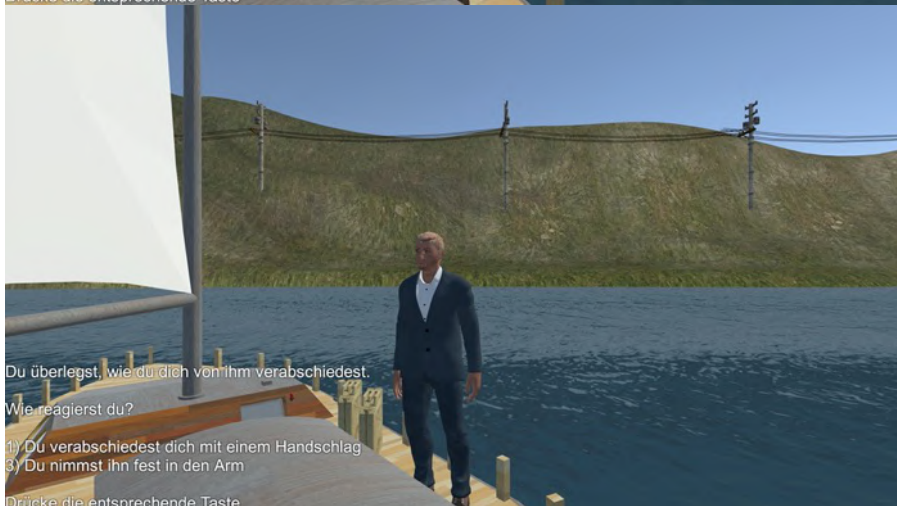

Du überlegst, wie du dich von ihm verabschiedest.

Wie reagierst du?

- 1) Du verabschiedest dich mit einem Handschlag
- 3) Du nimmst ihn fest in den Arm

Drücke die entsprechende Taste

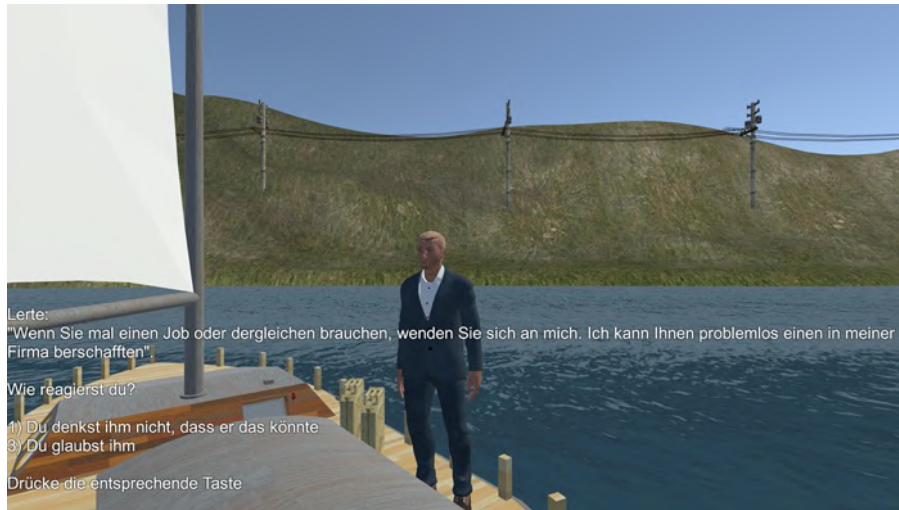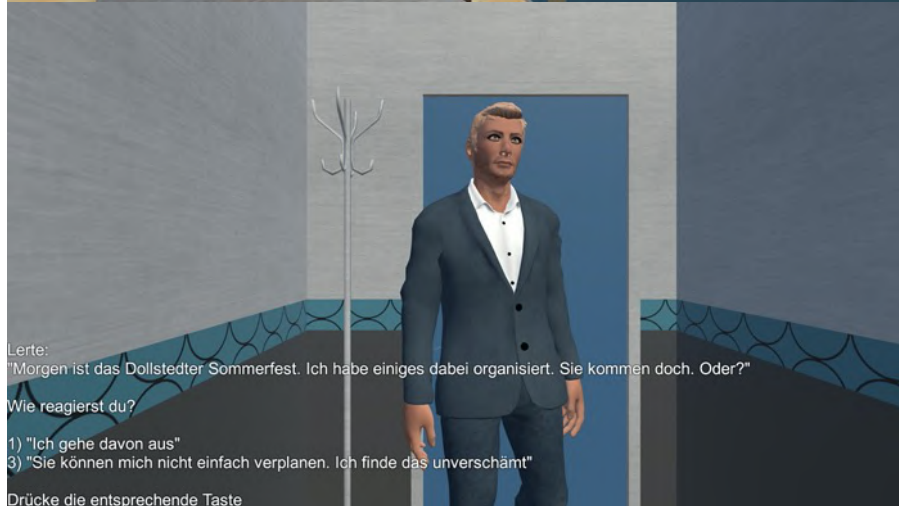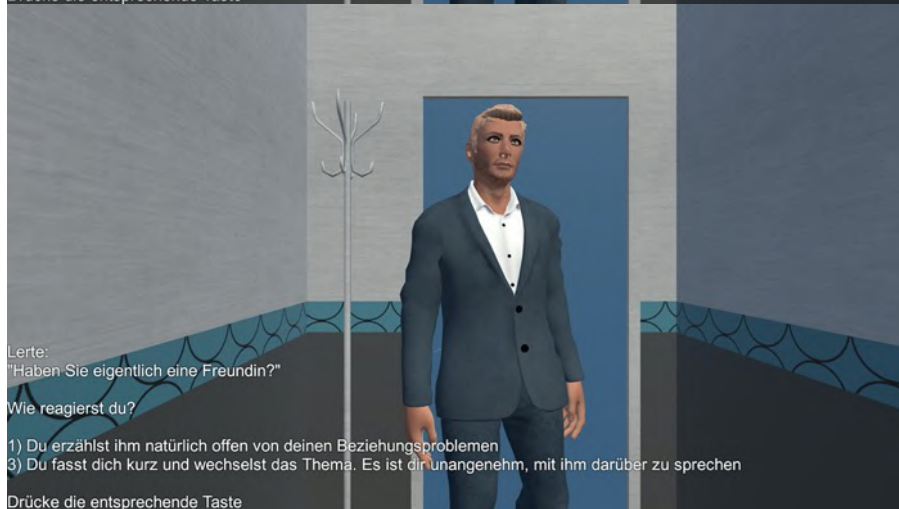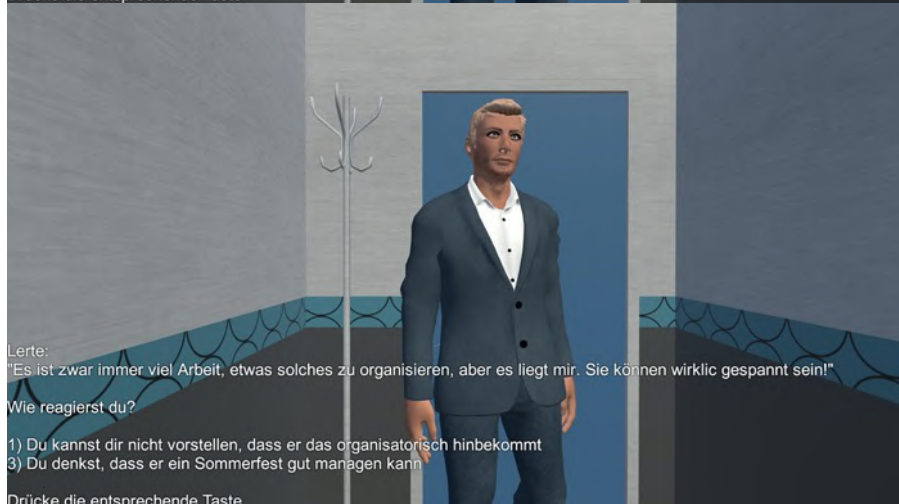

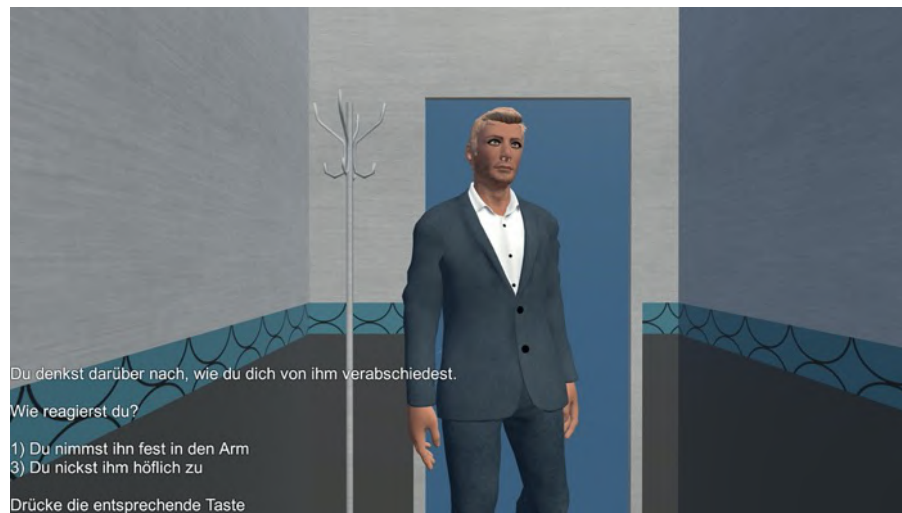

Du denkst darüber nach, wie du dich von ihm verabschiedest.

Wie reagierst du?

- 1) Du nimmst ihn fest in den Arm
- 3) Du nickst ihm höflich zu

Drücke die entsprechende Taste

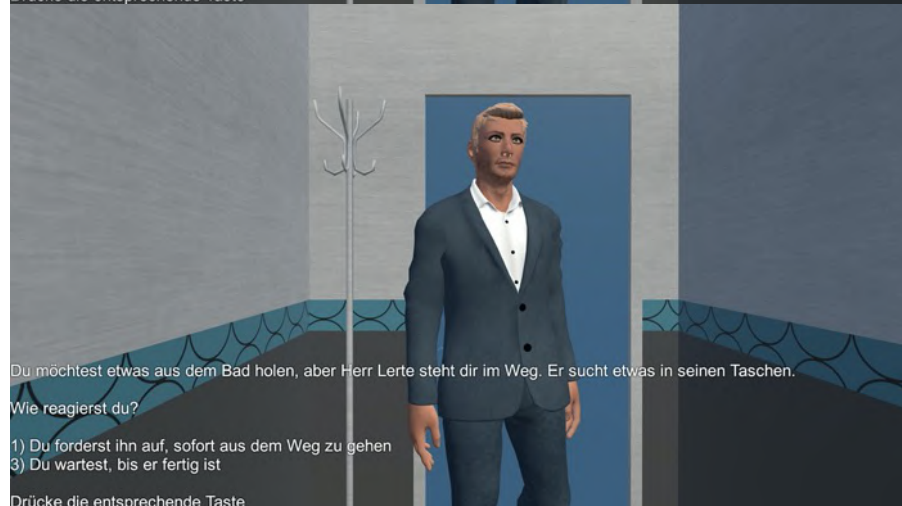

Du möchtest etwas aus dem Bad holen, aber Herr Lerte steht dir im Weg. Er sucht etwas in seinen Taschen.

Wie reagierst du?

- 1) Du forderst ihn auf, sofort aus dem Weg zu gehen
- 3) Du wartest, bis er fertig ist

Drücke die entsprechende Taste

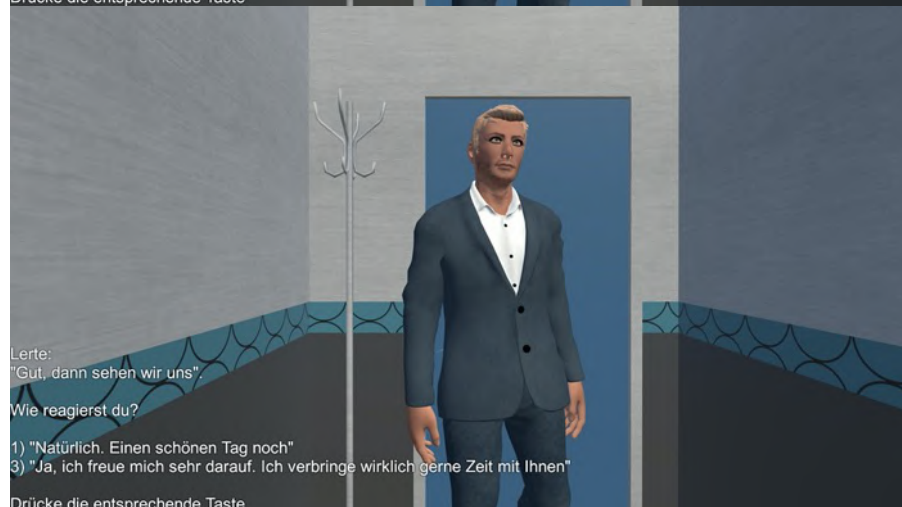

Lerte:  
"Gut, dann sehen wir uns".

Wie reagierst du?

- 1) "Natürlich. Einen schönen Tag noch"
- 3) "Ja, ich freue mich sehr darauf. Ich verbringe wirklich gerne Zeit mit Ihnen"

Drücke die entsprechende Taste

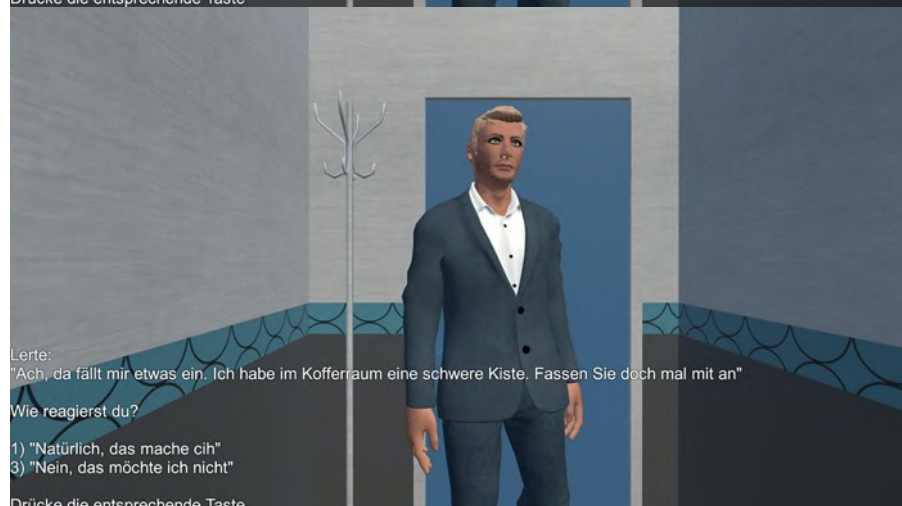

Lerte:  
"Ach, da fällt mir etwas ein. Ich habe im Kofferraum eine schwere Kiste. Fassen Sie doch mal mit an"

Wie reagierst du?

- 1) "Natürlich, das mache ich"
- 3) "Nein, das möchte ich nicht"

Drücke die entsprechende Taste

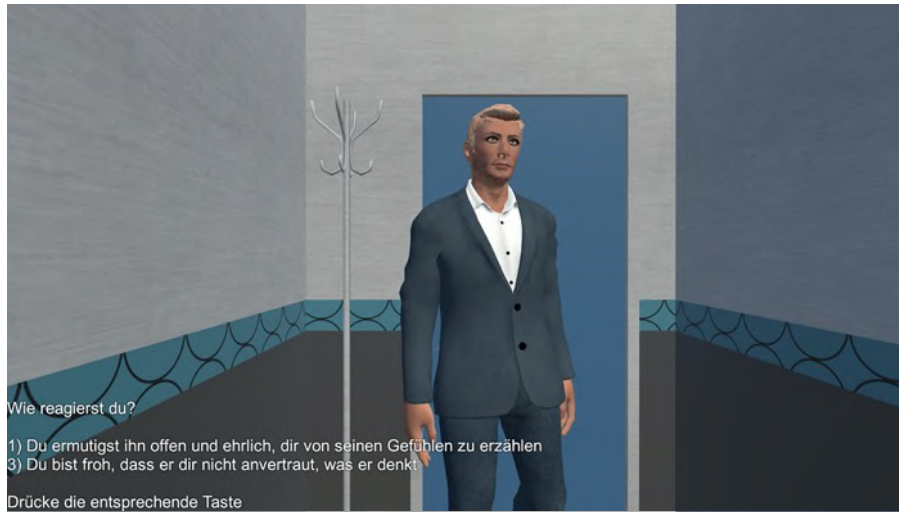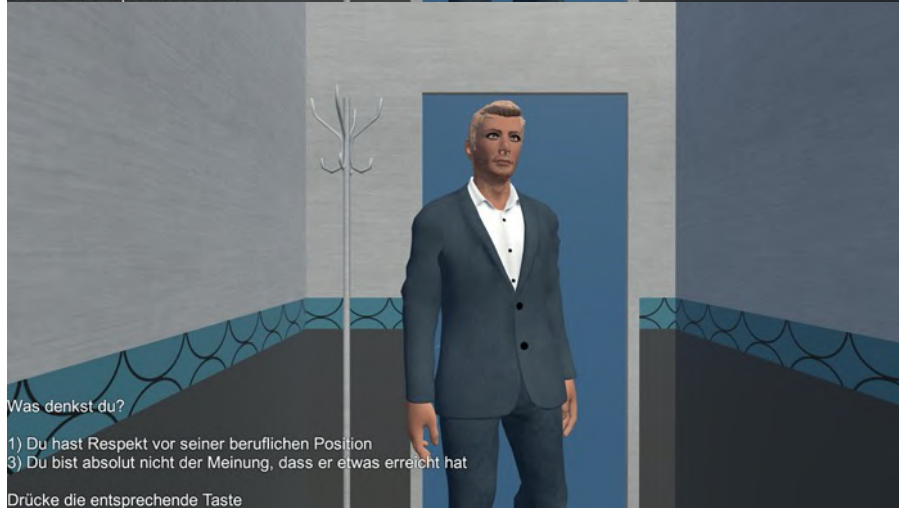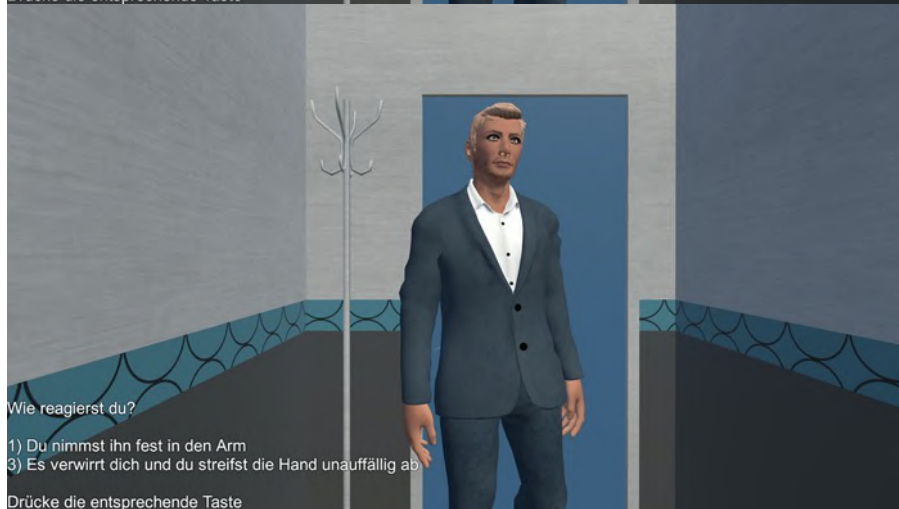

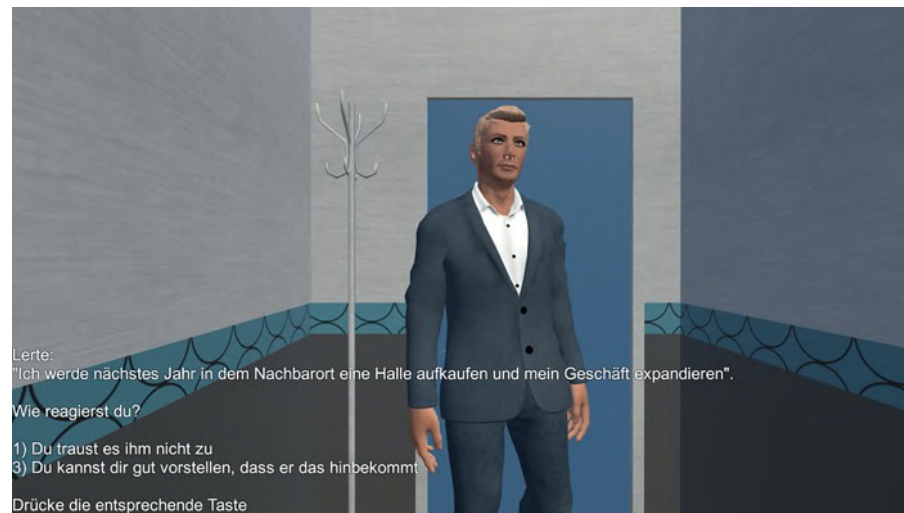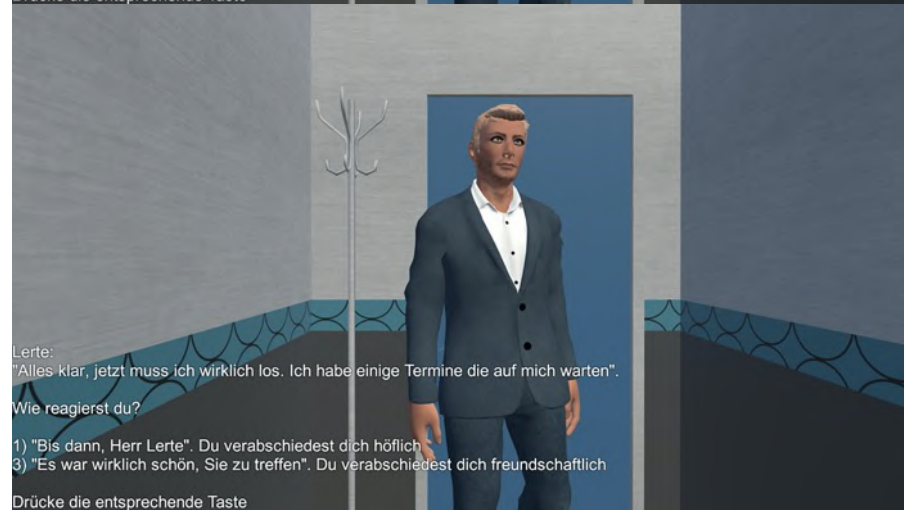

## S5.1.2 Hoekenburg (High-Power/Low-Affiliation, Remapping-Avatar)

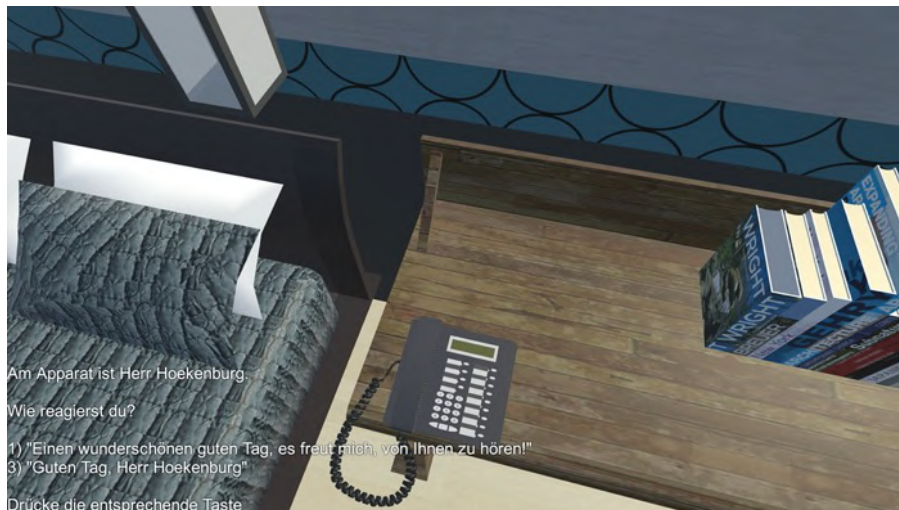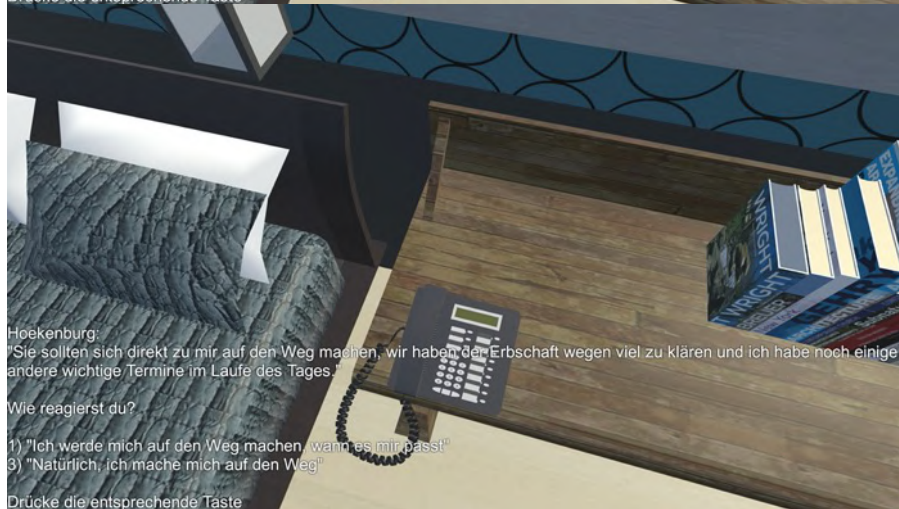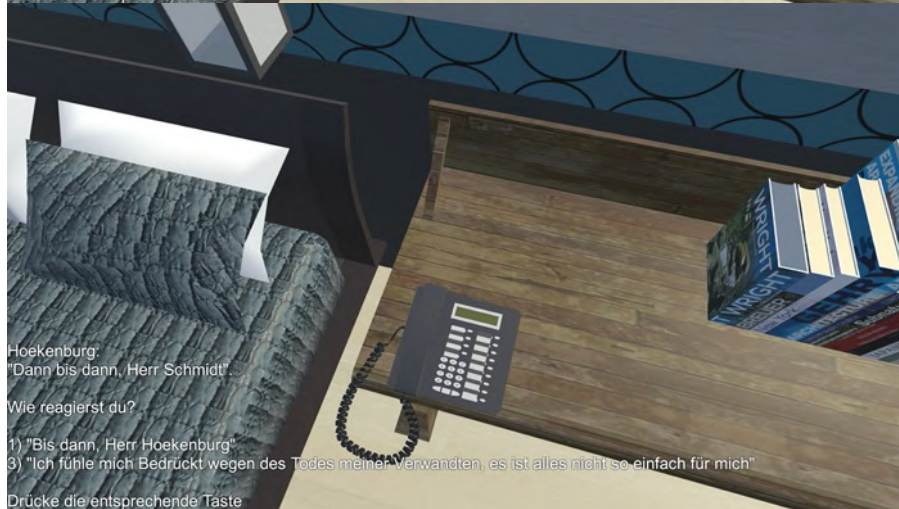

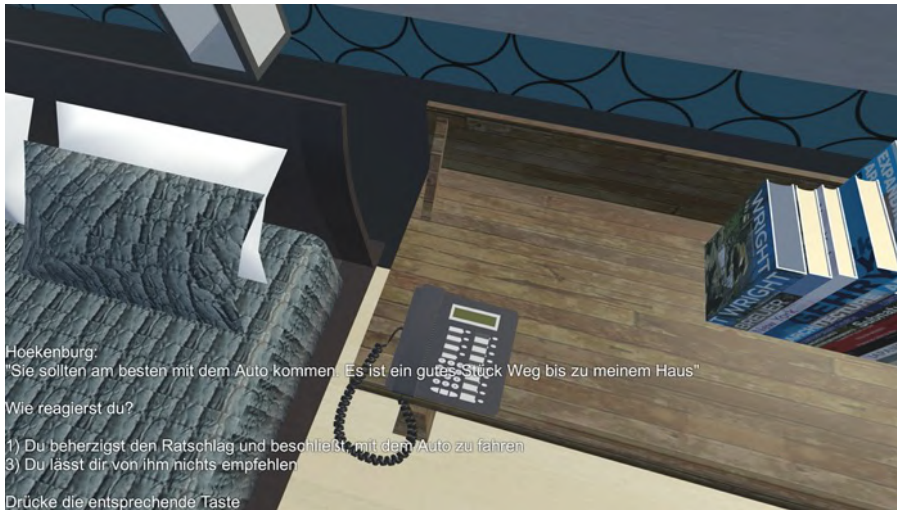

Hoekenburg:  
"Sie sollten am besten mit dem Auto kommen. Es ist ein gutes Stück Weg bis zu meinem Haus"

Wie reagierst du?

- 1) Du beherzigst den Ratschlag und beschließt, mit dem Auto zu fahren
- 3) Du lässt dir von ihm nichts empfehlen

Drücke die entsprechende Taste

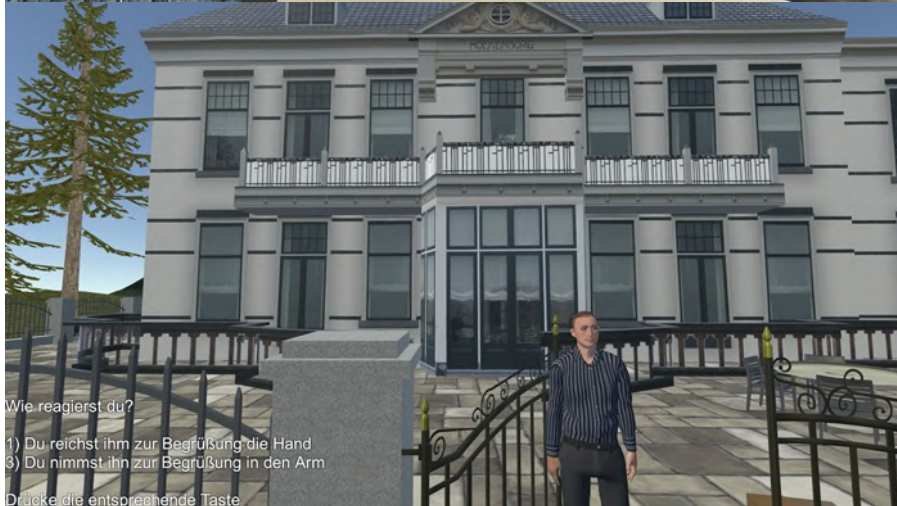

Wie reagierst du?

- 1) Du reichst ihm zur Begrüßung die Hand
- 3) Du nimmst ihn zur Begrüßung in den Arm

Drücke die entsprechende Taste

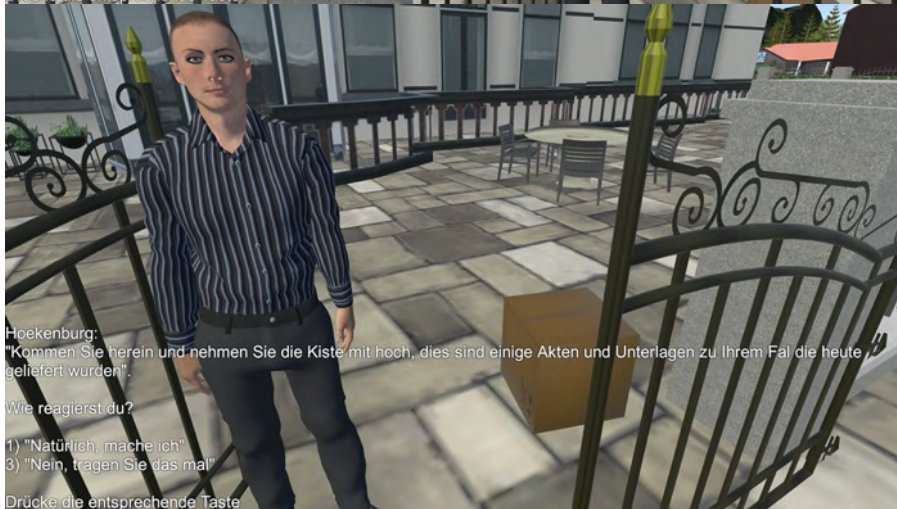

Hoekenburg:  
"Kommen Sie herein und nehmen Sie die Kiste mit hoch, dies sind einige Akten und Unterlagen zu Ihrem Fal die heute geliefert wurden".

Wie reagierst du?

- 1) "Natürlich, mache ich"
- 3) "Nein, tragen Sie das mal"

Drücke die entsprechende Taste

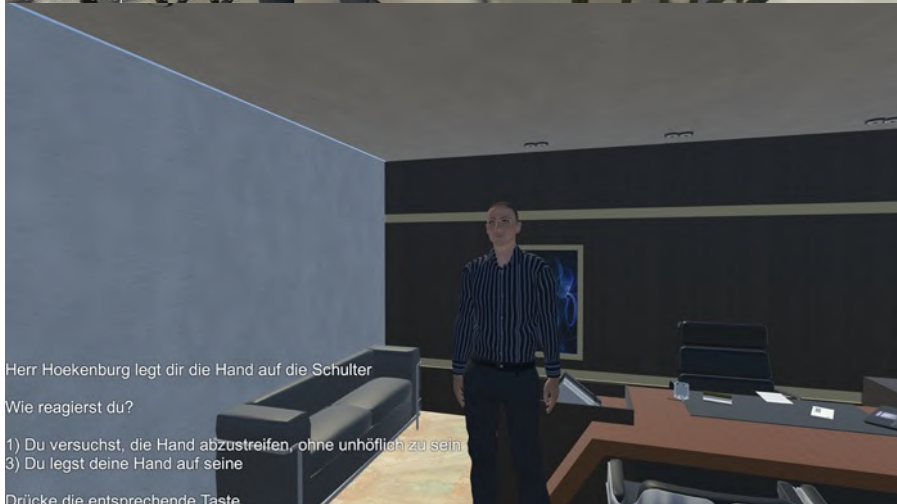

Herr Hoekenburg legt dir die Hand auf die Schulter

Wie reagierst du?

- 1) Du versuchst, die Hand abzustreifen, ohne unhöflich zu sein
- 3) Du legst deine Hand auf seine

Drücke die entsprechende Taste

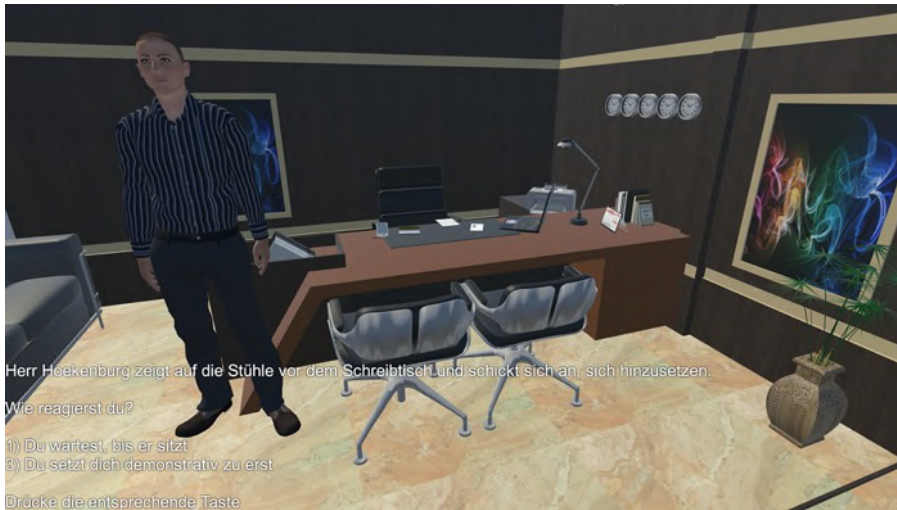

Herr Hoekenburg zeigt auf die Stühle vor dem Schreibtisch und schickt sich an, sich hinzusetzen.

Wie reagierst du?

- 1) Du wartest, bis er sitzt.
- 3) Du setzt dich demonstrativ zu erst

Drücke die entsprechende Taste

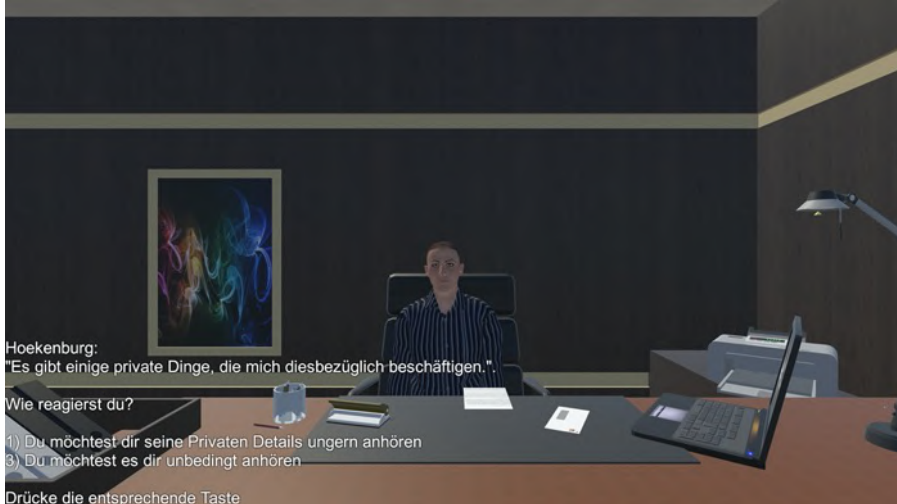

Hoekenburg:  
"Es gibt einige private Dinge, die mich diesbezüglich beschäftigen."

Wie reagierst du?

- 1) Du möchtest dir seine Privaten Details ungern anhören
- 3) Du möchtest es dir unbedingt anhören

Drücke die entsprechende Taste

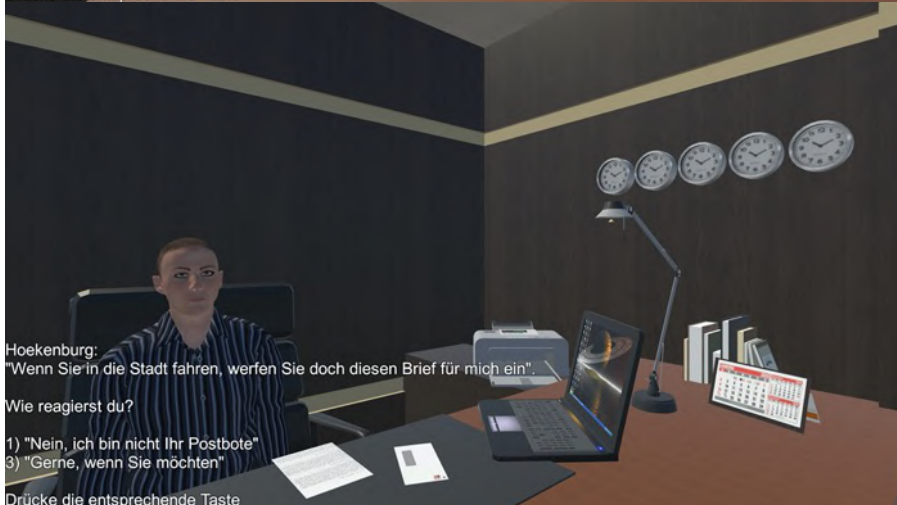

Hoekenburg:  
"Wenn Sie in die Stadt fahren, werfen Sie doch diesen Brief für mich ein".

Wie reagierst du?

- 1) "Nein, ich bin nicht Ihr Postbote"
- 3) "Gerne, wenn Sie möchten"

Drücke die entsprechende Taste

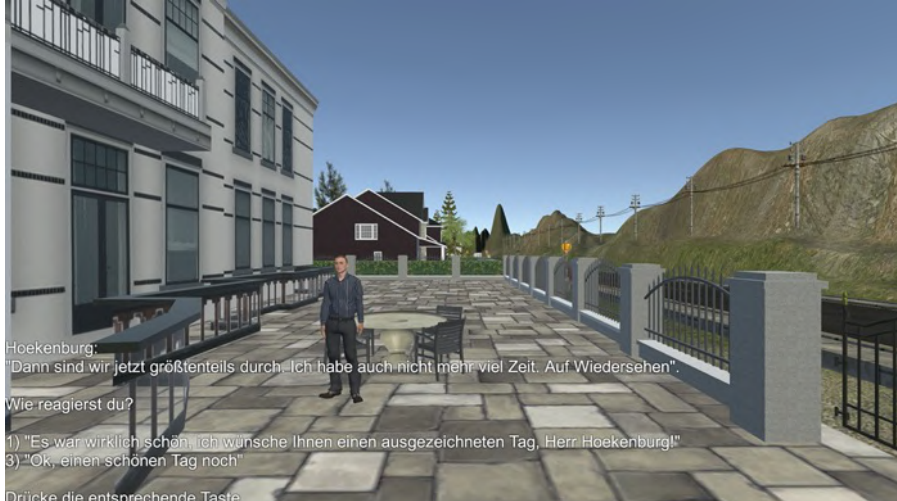

Hoekenburg:  
"Dann sind wir jetzt größtenteils durch. Ich habe auch nicht mehr viel Zeit. Auf Wiedersehen".

Wie reagierst du?

- 1) "Es war wirklich schön, ich wünsche Ihnen einen ausgezeichneten Tag, Herr Hoekenburg!"
- 3) "Ok, einen schönen Tag noch"

Drücke die entsprechende Taste



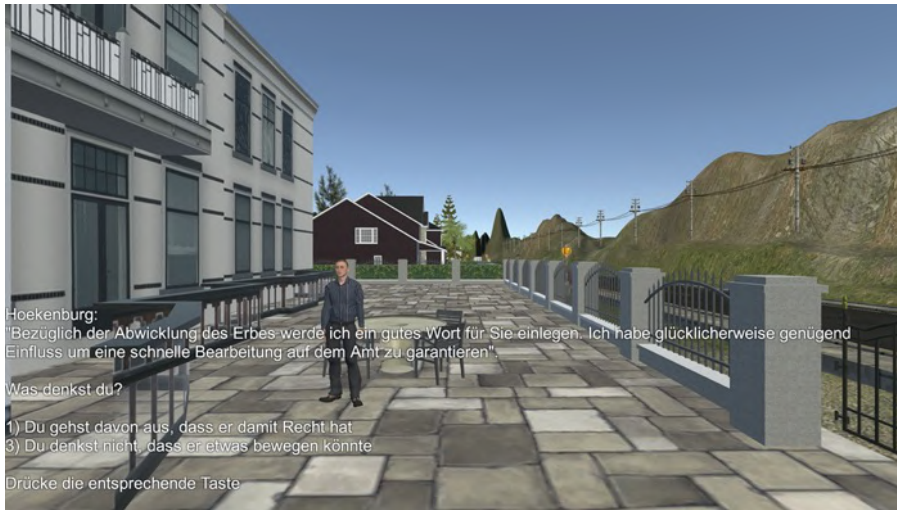

Hoekenburg:  
"Bezüglich der Abwicklung des Erbes werde ich ein gutes Wort für Sie einlegen. Ich habe glücklicherweise genügend Einfluss um eine schnelle Bearbeitung auf dem Amt zu garantieren".

Was denkst du?

- 1) Du gehst davon aus, dass er damit Recht hat
- 3) Du denkst nicht, dass er etwas bewegen könnte

Drücke die entsprechende Taste

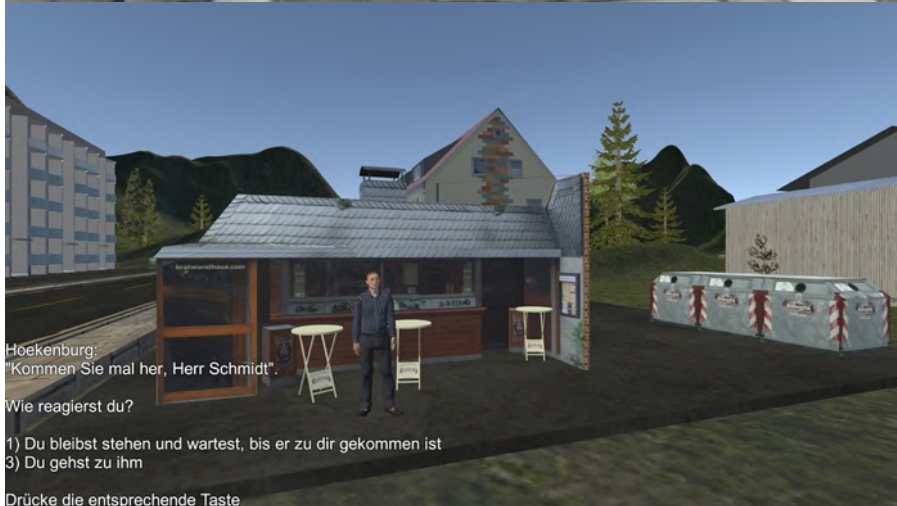

Hoekenburg:  
"Kommen Sie mal her, Herr Schmidt".

Wie reagierst du?

- 1) Du bleibst stehen und wartest, bis er zu dir gekommen ist
- 3) Du gehst zu ihm

Drücke die entsprechende Taste

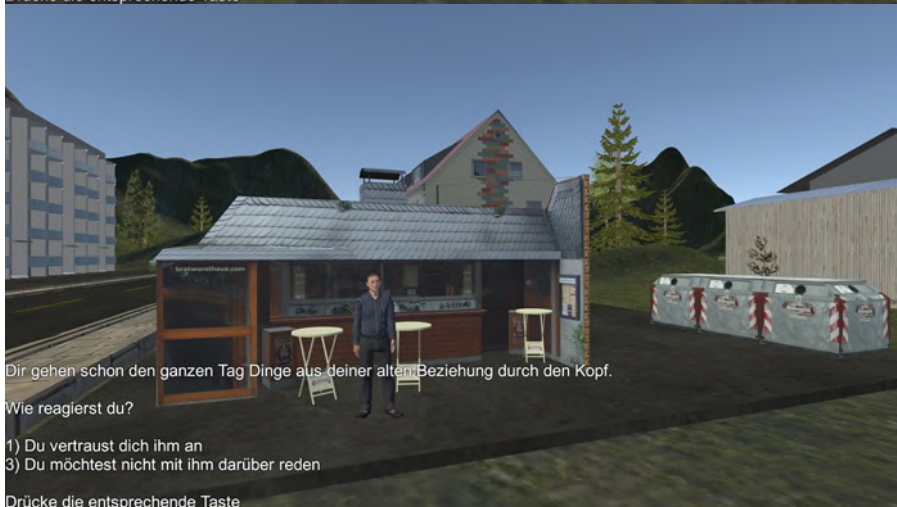

Dir gehen schon den ganzen Tag Dinge aus deiner alten Beziehung durch den Kopf.

Wie reagierst du?

- 1) Du vertraust dich ihm an
- 3) Du möchtest nicht mit ihm darüber reden

Drücke die entsprechende Taste

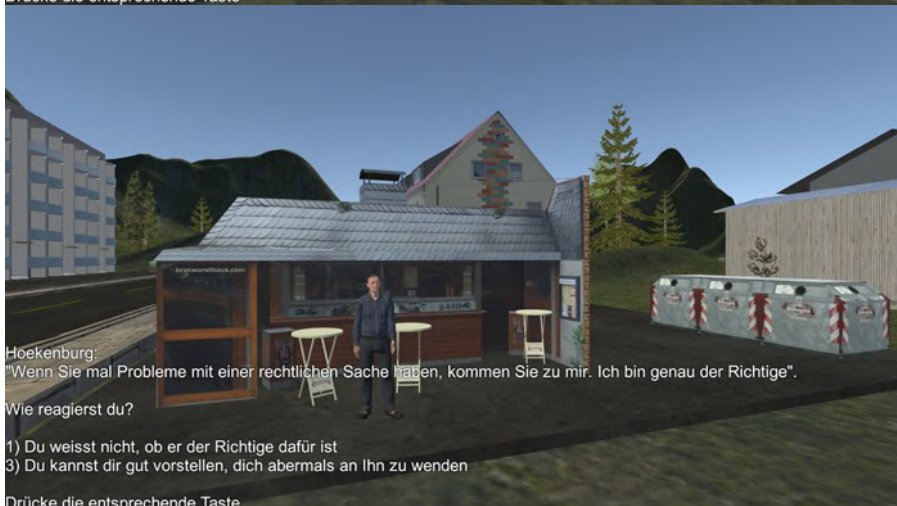

Hoekenburg:  
"Wenn Sie mal Probleme mit einer rechtlichen Sache haben, kommen Sie zu mir. Ich bin genau der Richtige".

Wie reagierst du?

- 1) Du weisst nicht, ob er der Richtige dafür ist
- 3) Du kannst dir gut vorstellen, dich abermals an ihn zu wenden

Drücke die entsprechende Taste

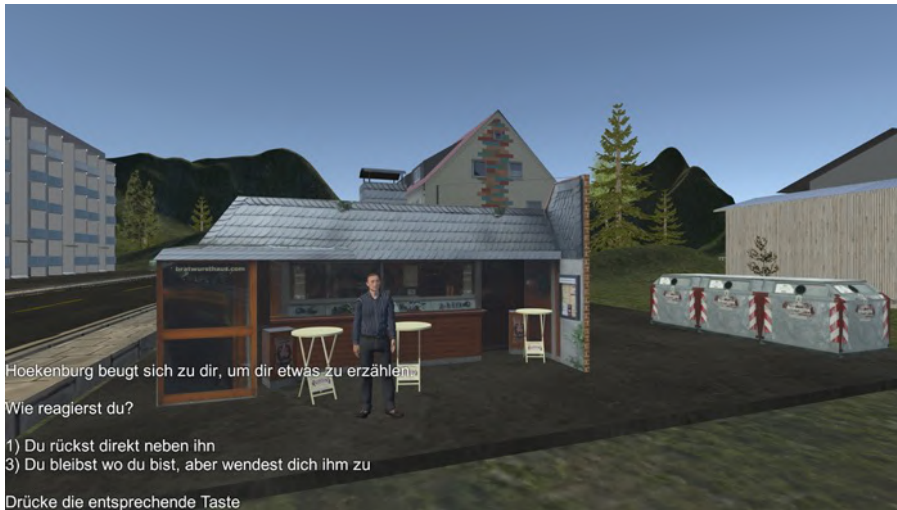

Hoekenburg beugt sich zu dir, um dir etwas zu erzählen.

Wie reagierst du?

- 1) Du rückst direkt neben ihn
- 3) Du bleibst wo du bist, aber wendest dich ihm zu

Drücke die entsprechende Taste

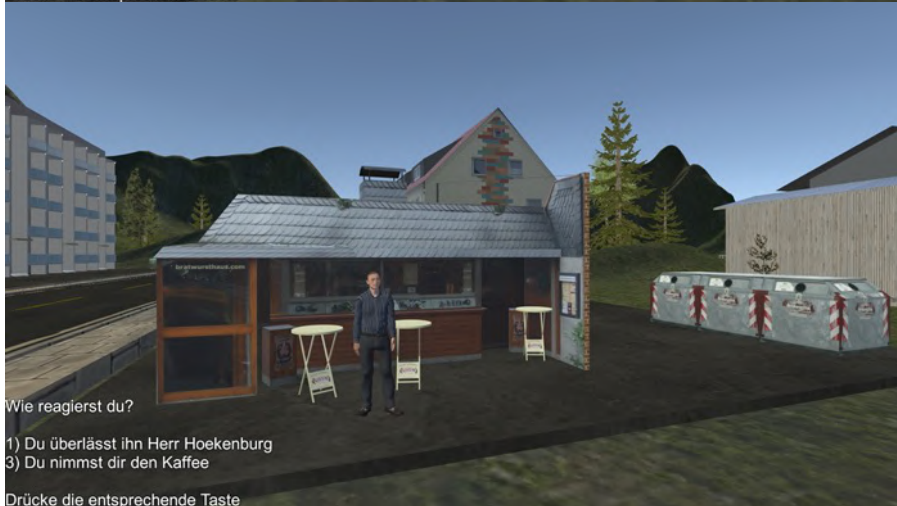

Wie reagierst du?

- 1) Du überlässt ihn Herr Hoekenburg
- 3) Du nimmst dir den Kaffee

Drücke die entsprechende Taste

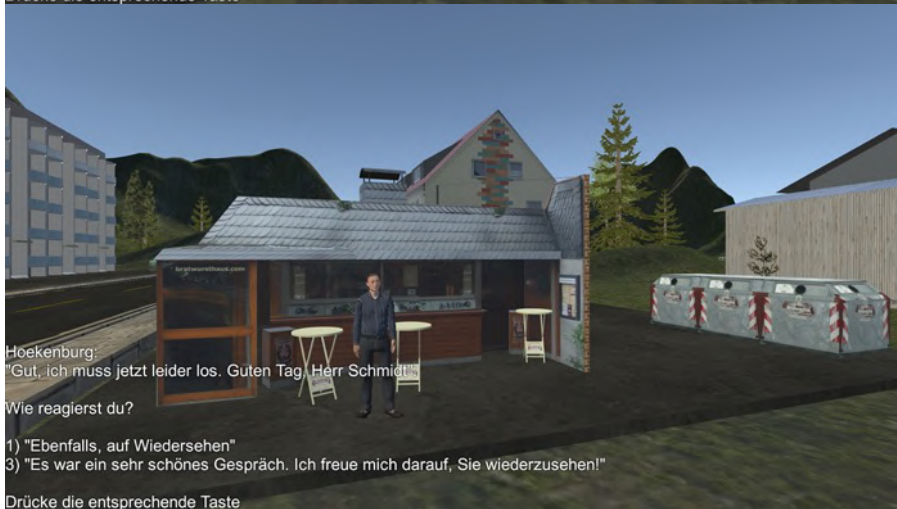

Hoekenburg:  
"Gut, ich muss jetzt leider los. Guten Tag, Herr Schmidt"

Wie reagierst du?

- 1) "Ebenfalls, auf Wiedersehen"
- 3) "Es war ein sehr schönes Gespräch. Ich freue mich darauf, Sie wiederzusehen!"

Drücke die entsprechende Taste

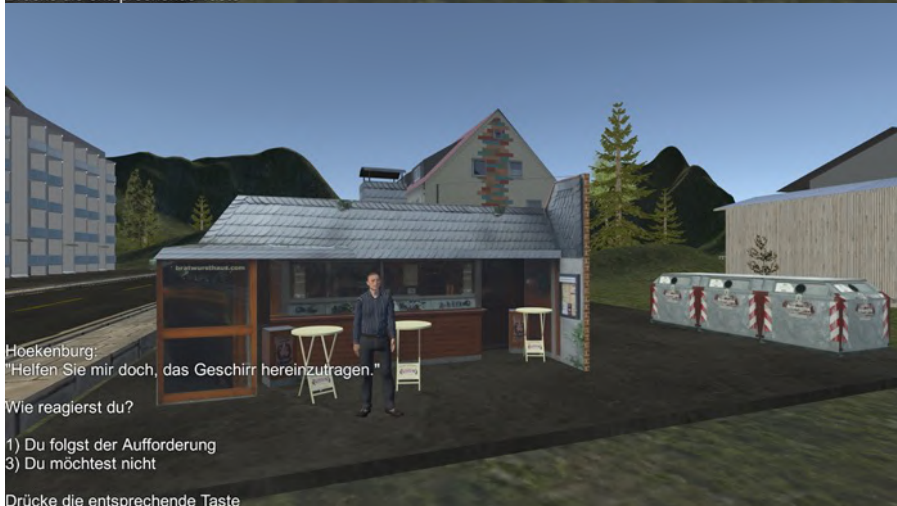

Hoekenburg:  
"Helfen Sie mir doch, das Geschirr hereinzutragen."

Wie reagierst du?

- 1) Du folgst der Aufforderung
- 3) Du möchtest nicht

Drücke die entsprechende Taste

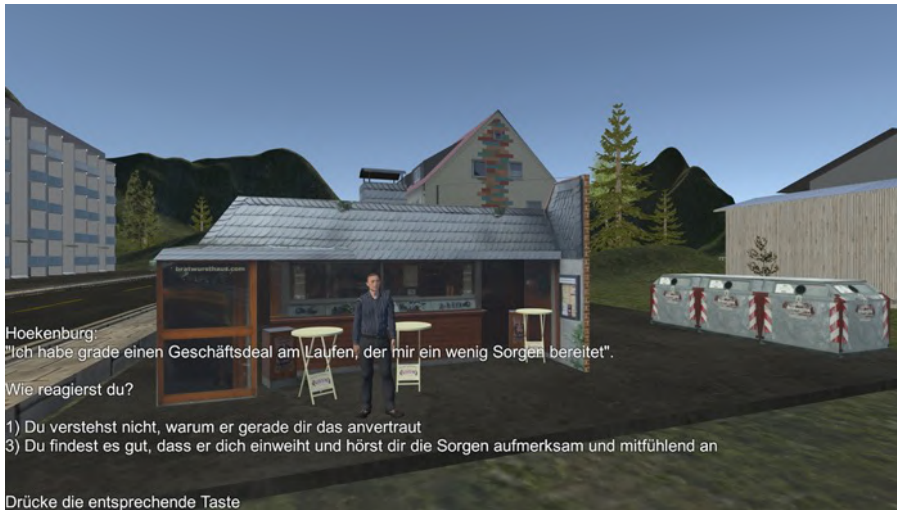

Hoekenburg:

"Ich habe gerade einen Geschäftsdeal am Laufen, der mir ein wenig Sorgen bereitet".

Wie reagierst du?

- 1) Du verstehst nicht, warum er gerade dir das anvertraut
- 3) Du findest es gut, dass er dich einweihet und hörst dir die Sorgen aufmerksam und mitfühlend an

Drücke die entsprechende Taste

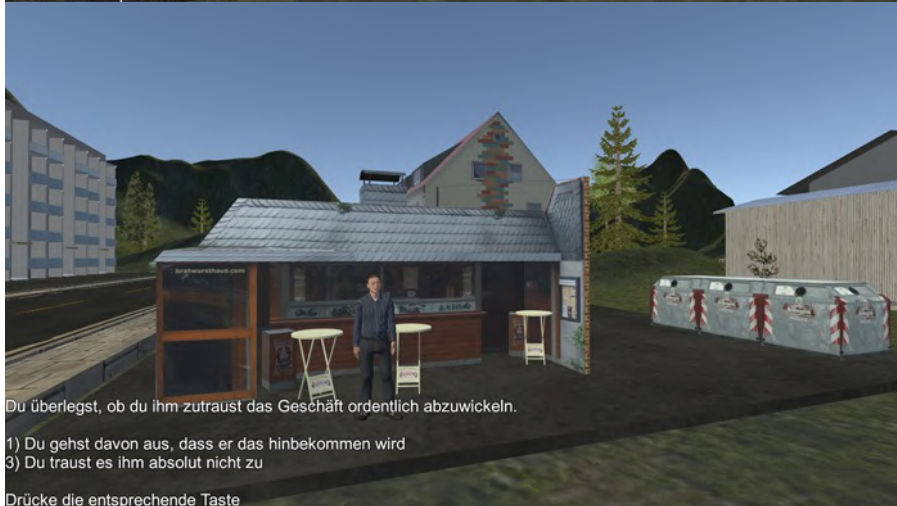

Du überlegst, ob du ihm zutraust das Geschäft ordentlich abzuwickeln.

- 1) Du gehst davon aus, dass er das hinbekommen wird
- 3) Du traust es ihm absolut nicht zu

Drücke die entsprechende Taste

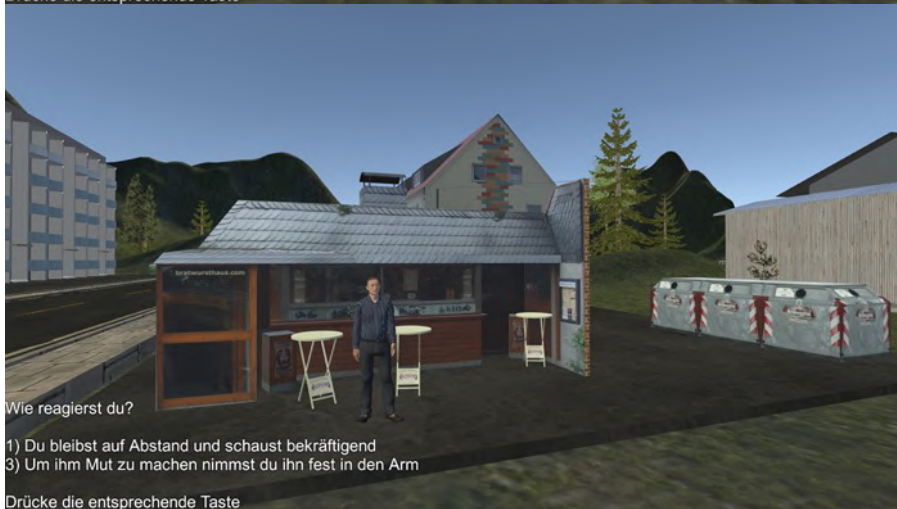

Wie reagierst du?

- 1) Du bleibst auf Abstand und schaust bekräftigend
- 3) Um ihm Mut zu machen nimmst du ihn fest in den Arm

Drücke die entsprechende Taste

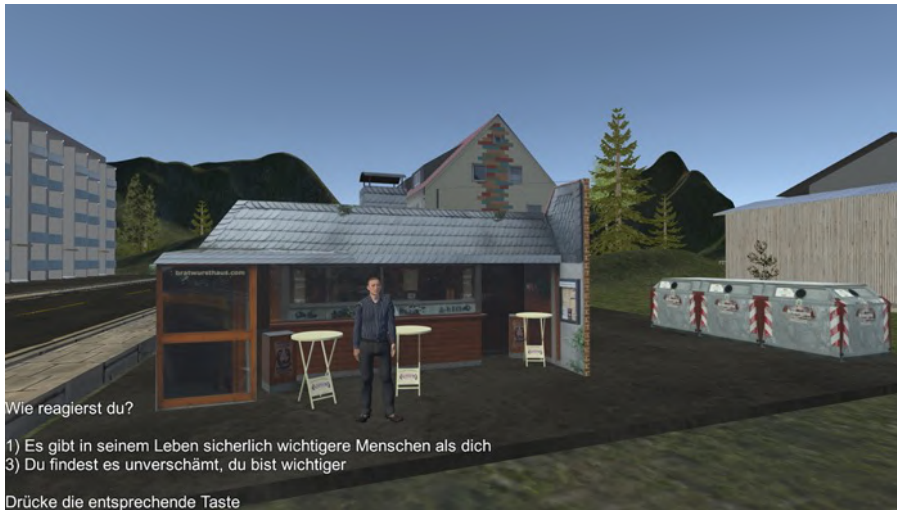

Wie reagierst du?

- 1) Es gibt in seinem Leben sicherlich wichtigere Menschen als dich
- 3) Du findest es unverschämt, du bist wichtiger

Drücke die entsprechende Taste

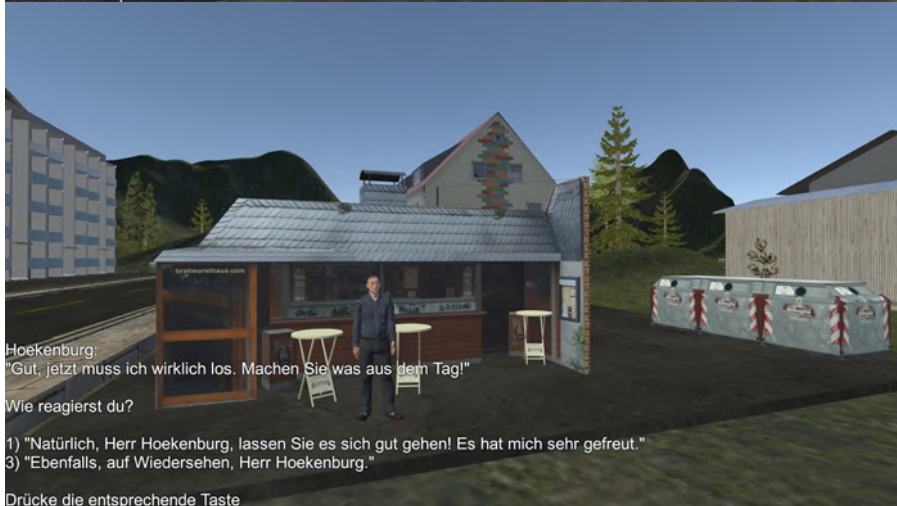

Hoekenburg:

"Gut, jetzt muss ich wirklich los. Machen Sie was aus dem Tag!"

Wie reagierst du?

- 1) "Natürlich, Herr Hoekenburg, lassen Sie es sich gut gehen! Es hat mich sehr gefreut."
- 3) "Ebenfalls, auf Wiedersehen, Herr Hoekenburg."

Drücke die entsprechende Taste

### S5.1.3 Berger (Low-Power/High-Affiliation, Updating-Avatar)

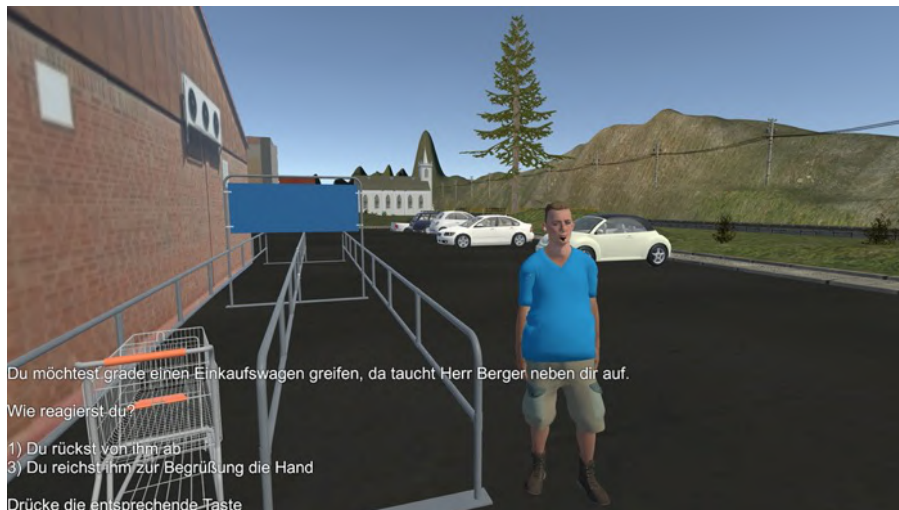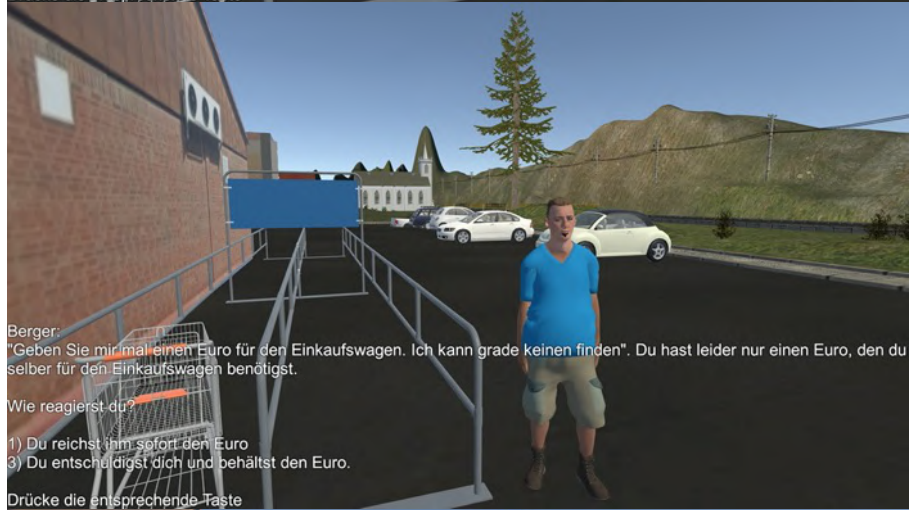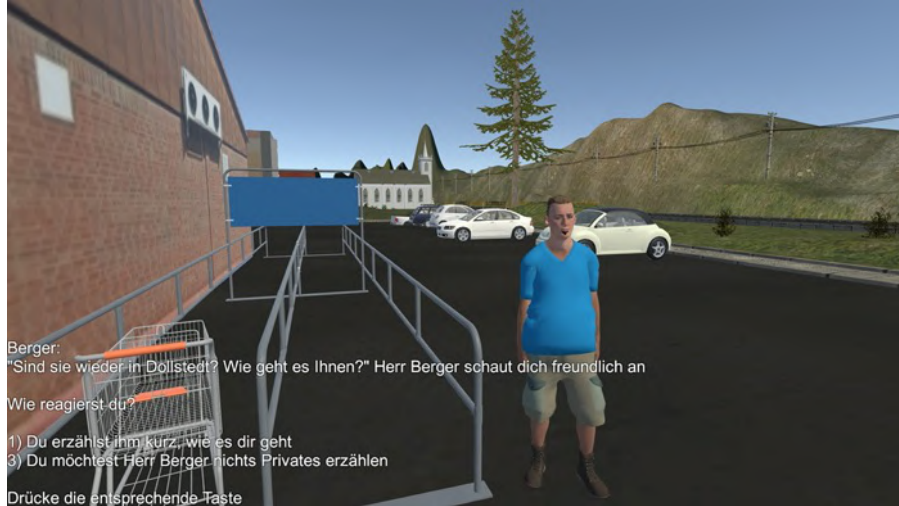

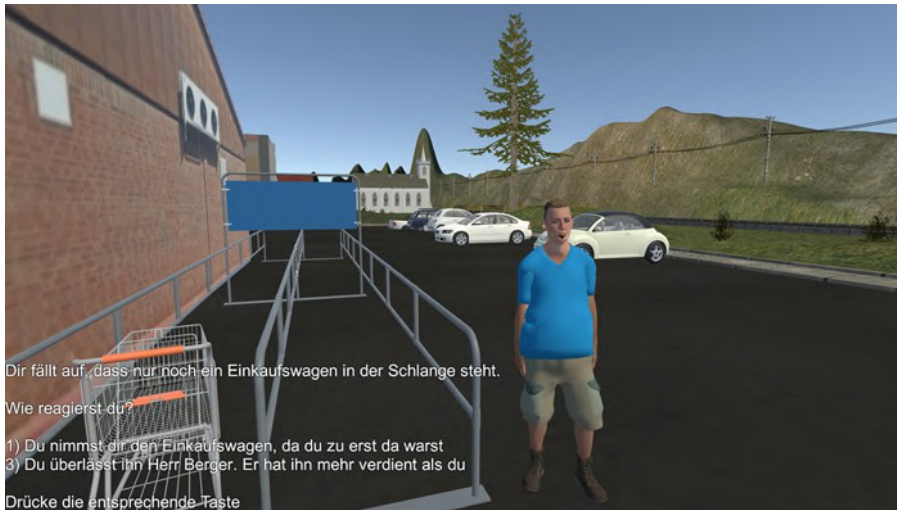

Dir fällt auf, dass nur noch ein Einkaufswagen in der Schlange steht.

Wie reagierst du?

- 1) Du nimmst dir den Einkaufswagen, da du zu erst da warst
- 3) Du überlässt ihn Herr Berger. Er hat ihn mehr verdient als du

Drücke die entsprechende Taste

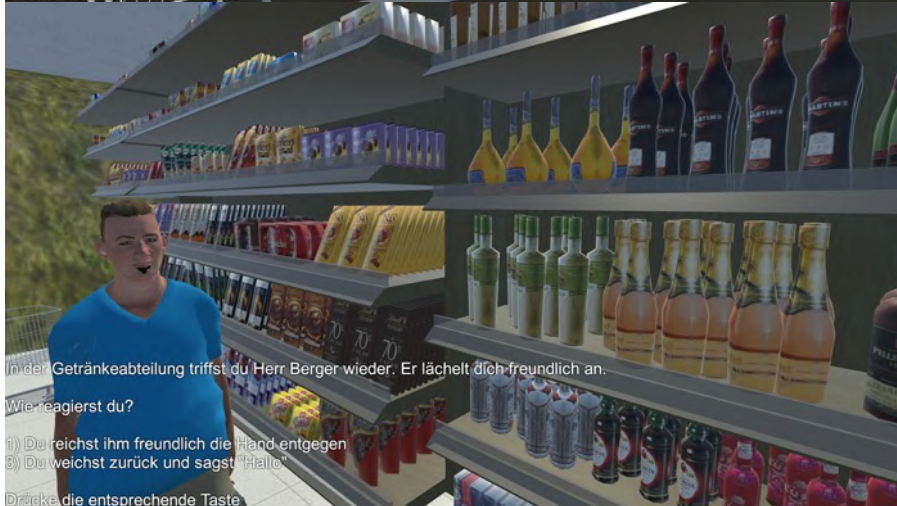

In der Getränkeabteilung triffst du Herr Berger wieder. Er lächelt dich freundlich an.

Wie reagierst du?

- 1) Du reichst ihm freundlich die Hand entgegen
- 3) Du weichst zurück und sagst "Hallo"

Drücke die entsprechende Taste

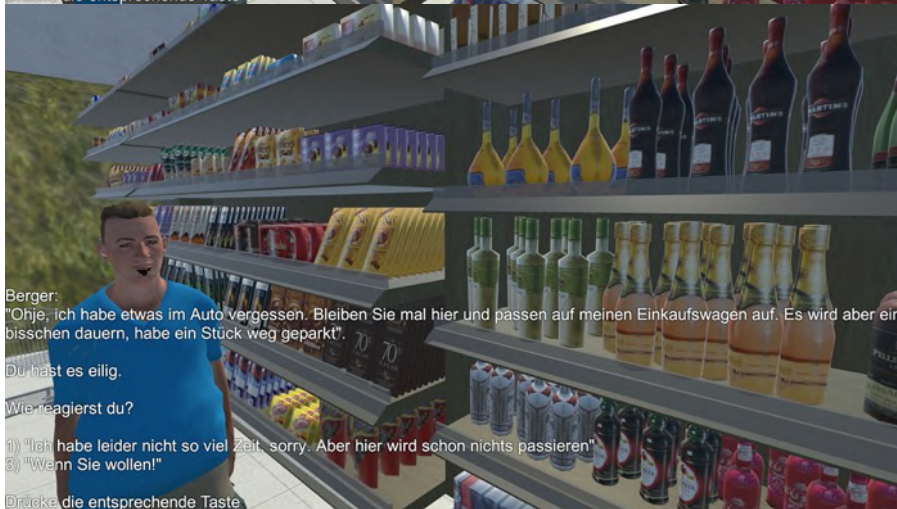

Berger:

"Ohje, ich habe etwas im Auto vergessen. Bleiben Sie mal hier und passen auf meinen Einkaufswagen auf. Es wird aber ein bisschen dauern, habe ein Stück weg geparkt".

Du hast es eilig.

Wie reagierst du?

- 1) "Ich habe leider nicht so viel Zeit, sorry. Aber hier wird schon nichts passieren"
- 3) "Wenn Sie wollen!"

Drücke die entsprechende Taste

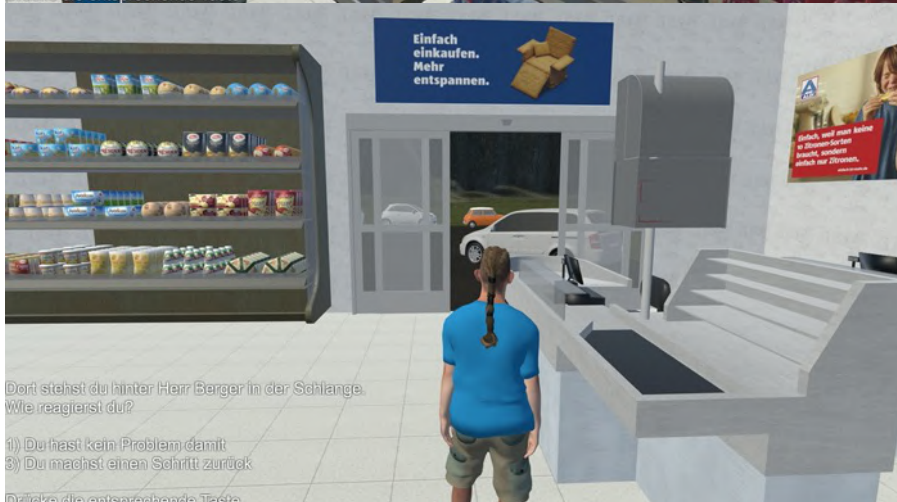

Dort stehst du hinter Herr Berger in der Schlange. Wie reagierst du?

- 1) Du hast kein Problem damit
- 3) Du machst einen Schritt zurück

Drücke die entsprechende Taste

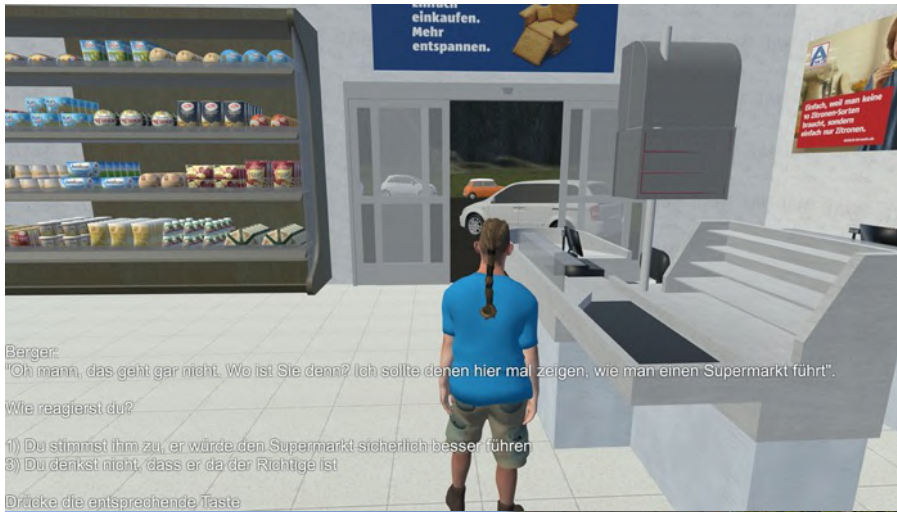

Berger:  
"Oh mann, das geht gar nicht. Wo ist Sie denn? Ich sollte denen hier mal zeigen, wie man einen Supermarkt führt".

Wie reagierst du?

- 1) Du stimmst ihm zu, er würde den Supermarkt sicherlich besser führen
- 3) Du denkst nicht, dass er da der Richtige ist

Drücke die entsprechende Taste

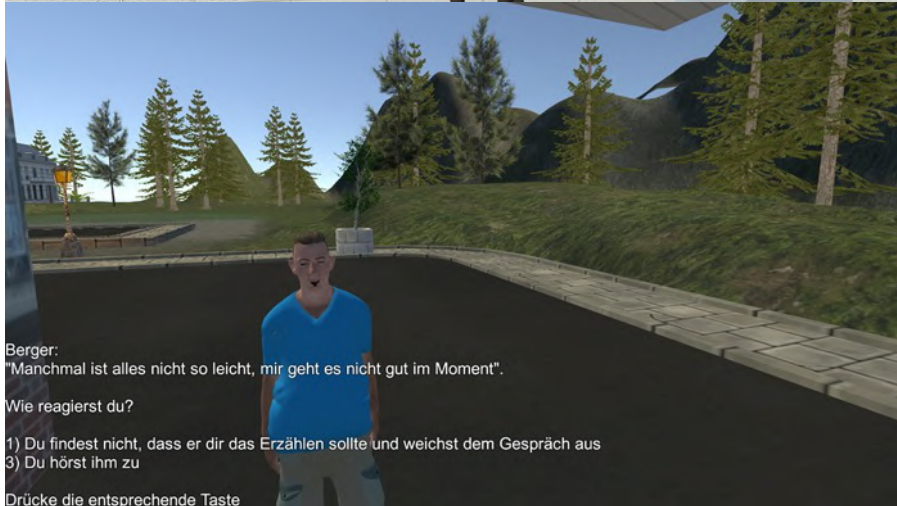

Berger:  
"Manchmal ist alles nicht so leicht, mir geht es nicht gut im Moment".

Wie reagierst du?

- 1) Du findest nicht, dass er dir das Erzählen sollte und weichst dem Gespräch aus
- 3) Du hörst ihm zu

Drücke die entsprechende Taste

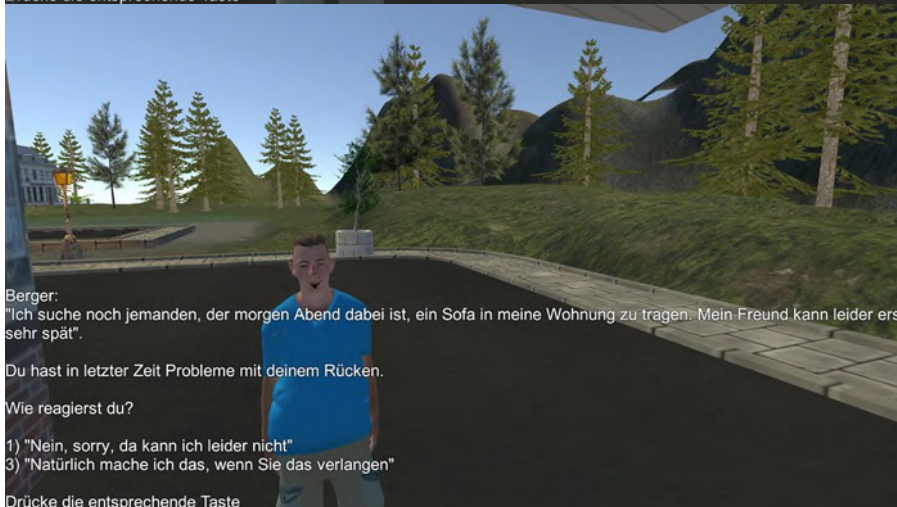

Berger:  
"Ich suche noch jemanden, der morgen Abend dabei ist, ein Sofa in meine Wohnung zu tragen. Mein Freund kann leider erst sehr spät".

Du hast in letzter Zeit Probleme mit deinem Rücken.

Wie reagierst du?

- 1) "Nein, sorry, da kann ich leider nicht"
- 3) "Natürlich mache ich das, wenn Sie das verlangen"

Drücke die entsprechende Taste

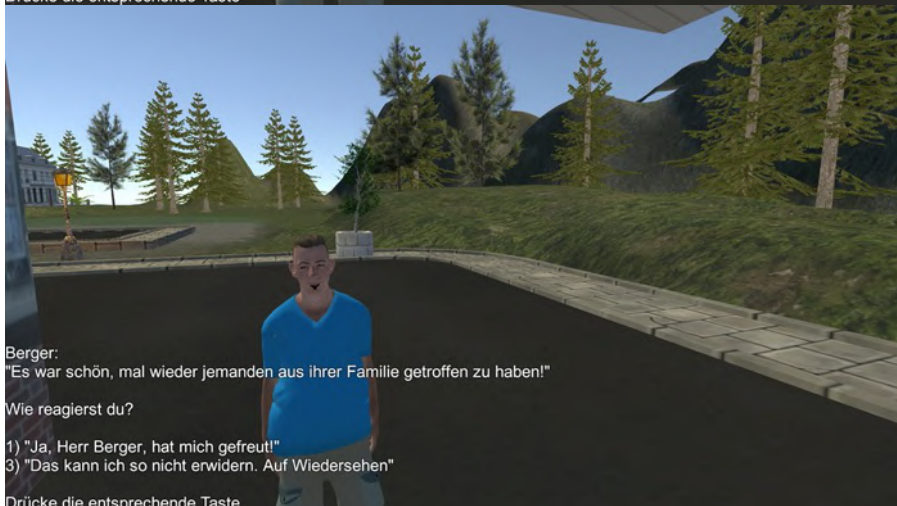

Berger:  
"Es war schön, mal wieder jemanden aus ihrer Familie getroffen zu haben!"

Wie reagierst du?

- 1) "Ja, Herr Berger, hat mich gefreut!"
- 3) "Das kann ich so nicht erwidern. Auf Wiedersehen"

Drücke die entsprechende Taste

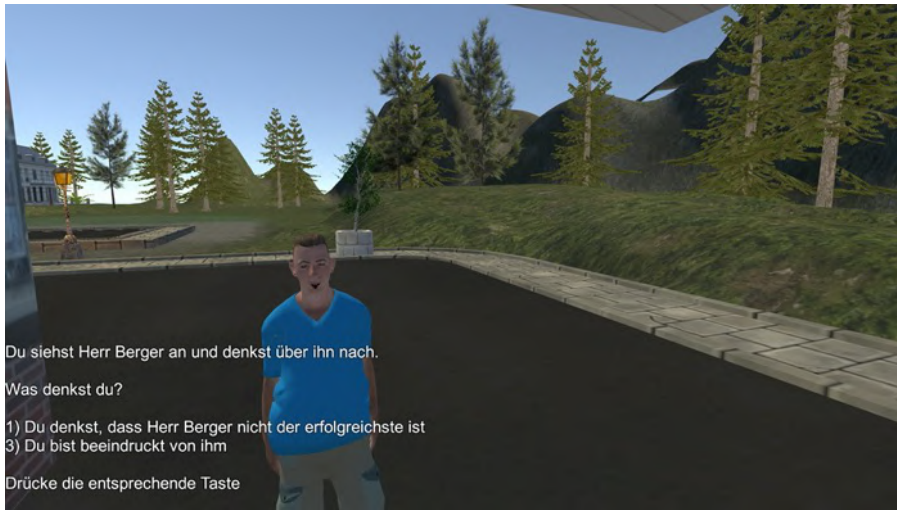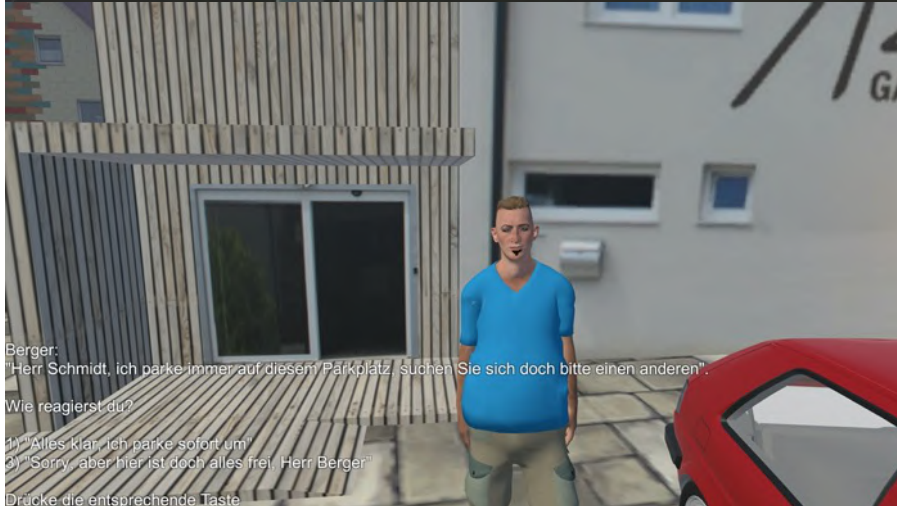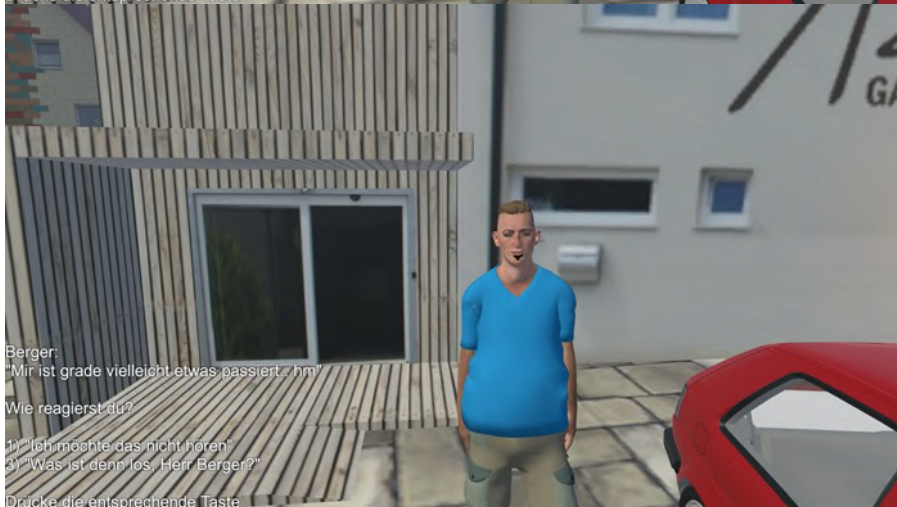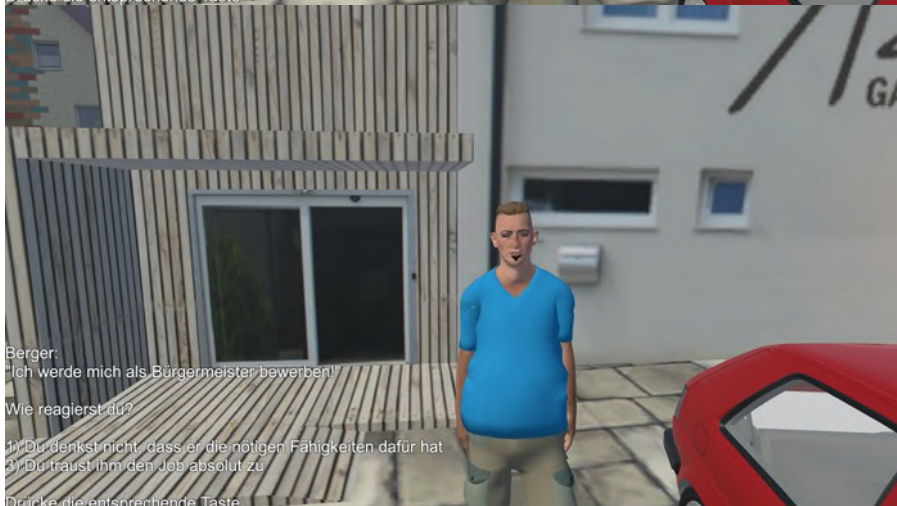



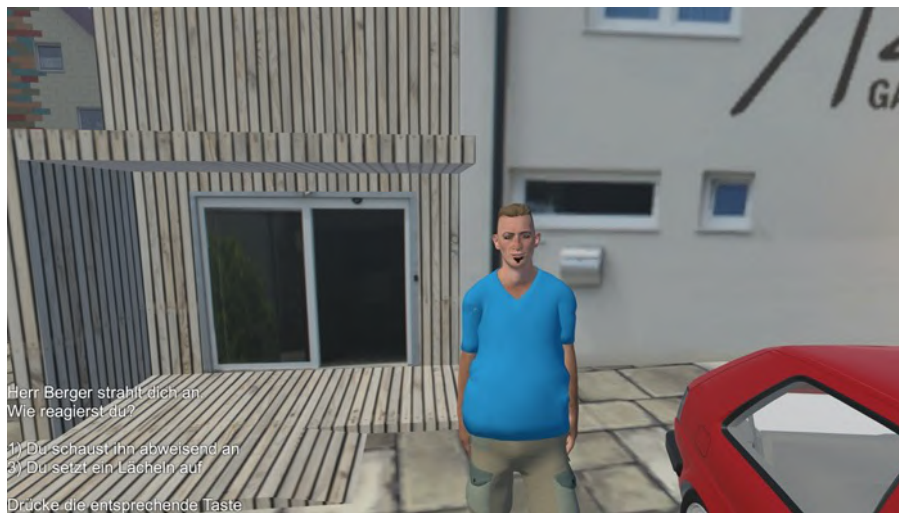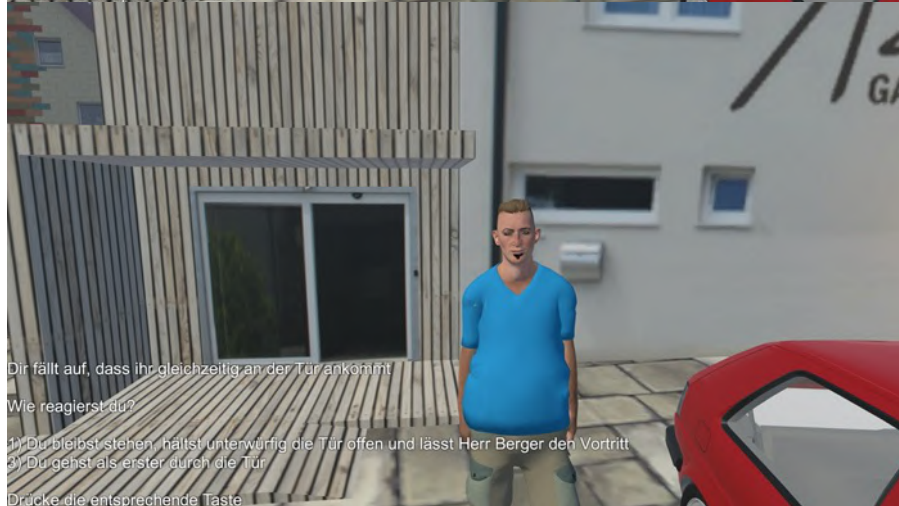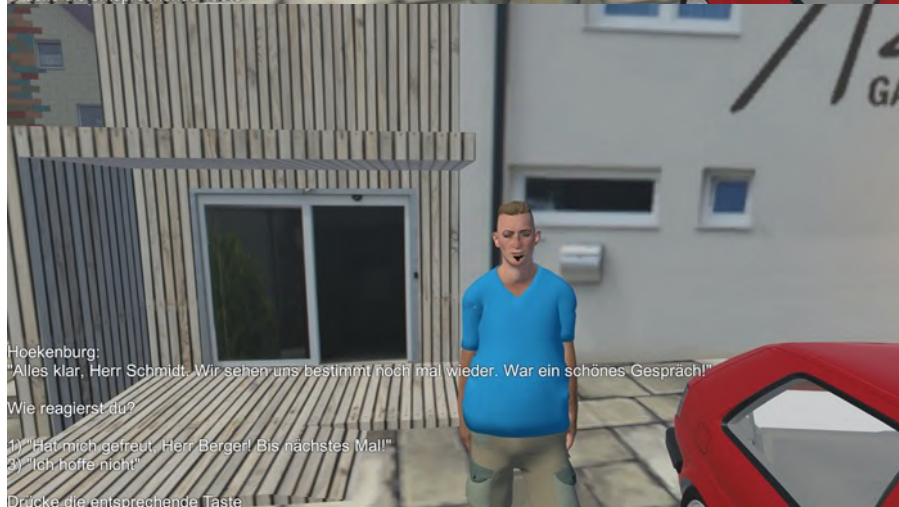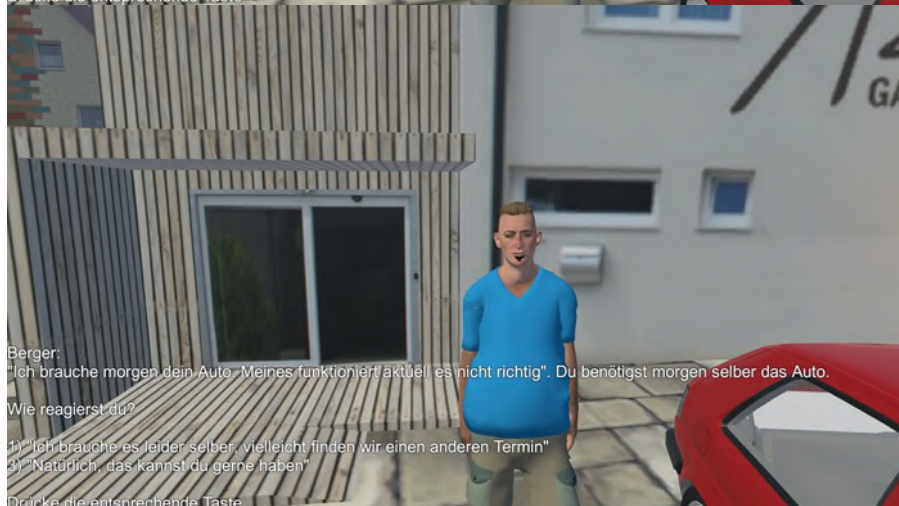

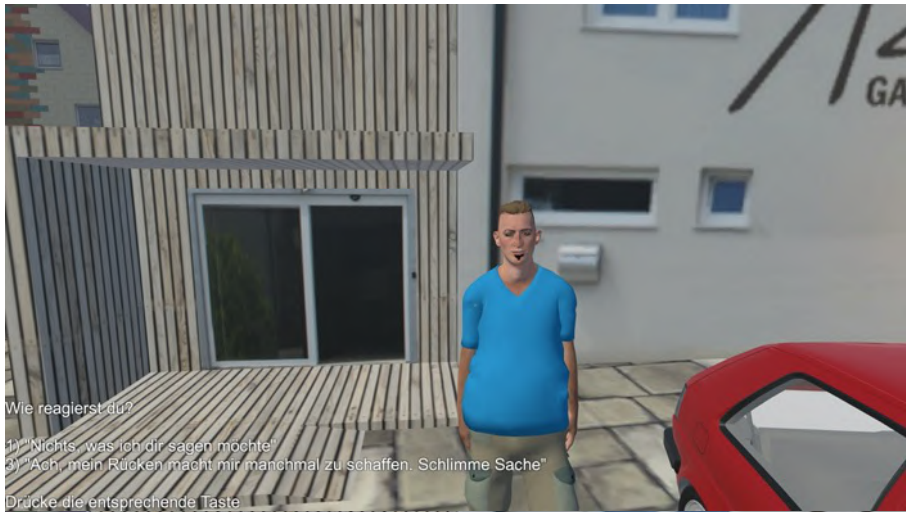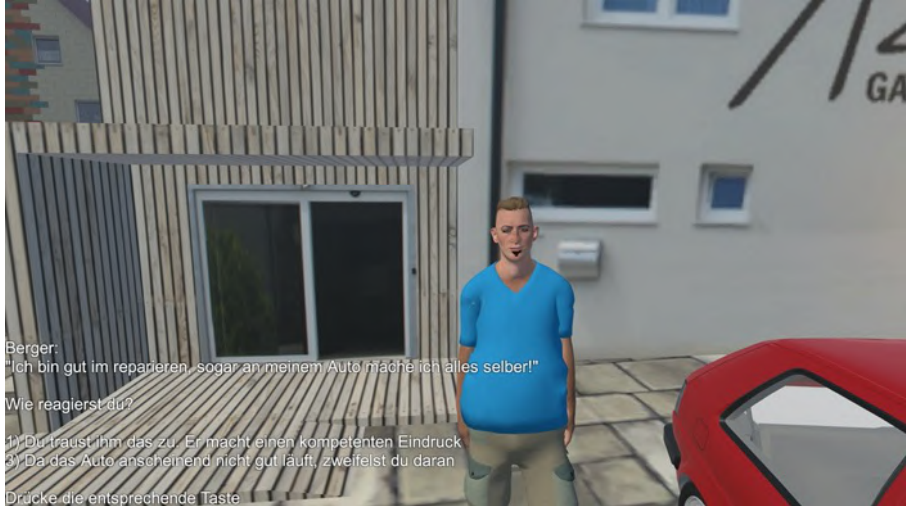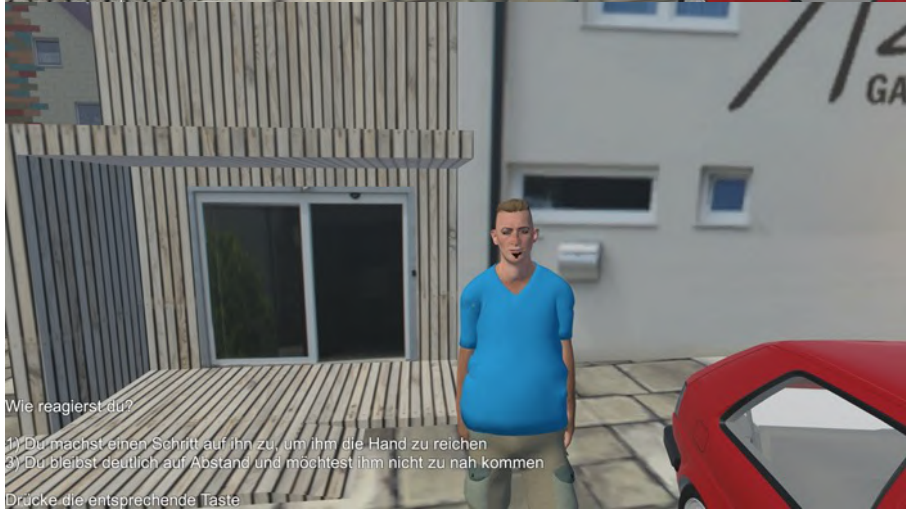

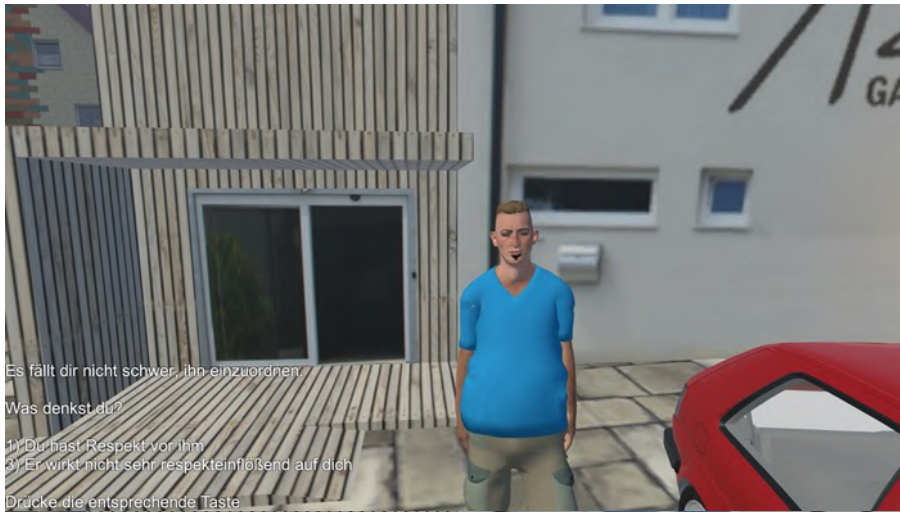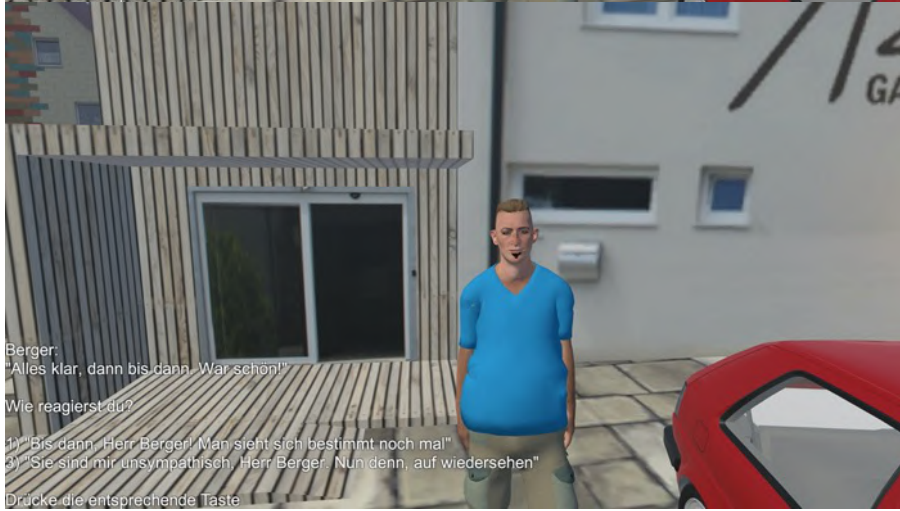

### S5.1.4 Karoske (Low-Power/High-Affiliation, Remapping-Avatar)

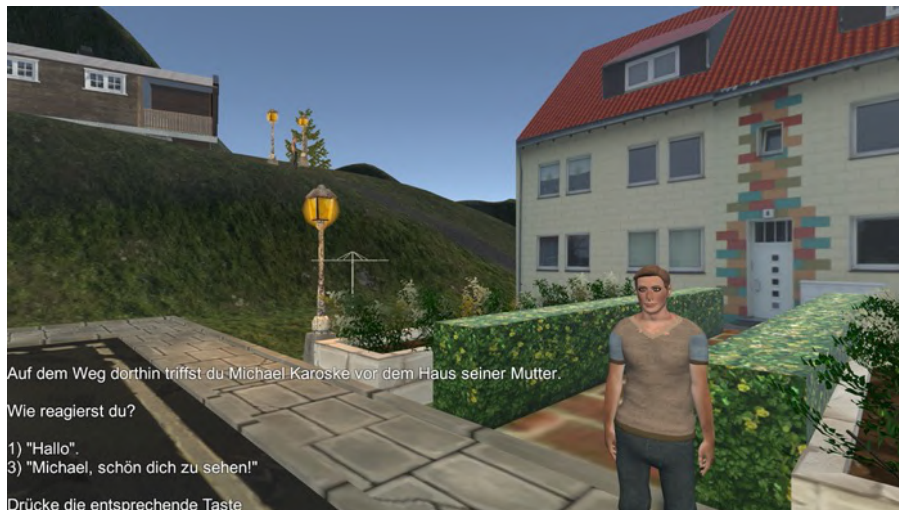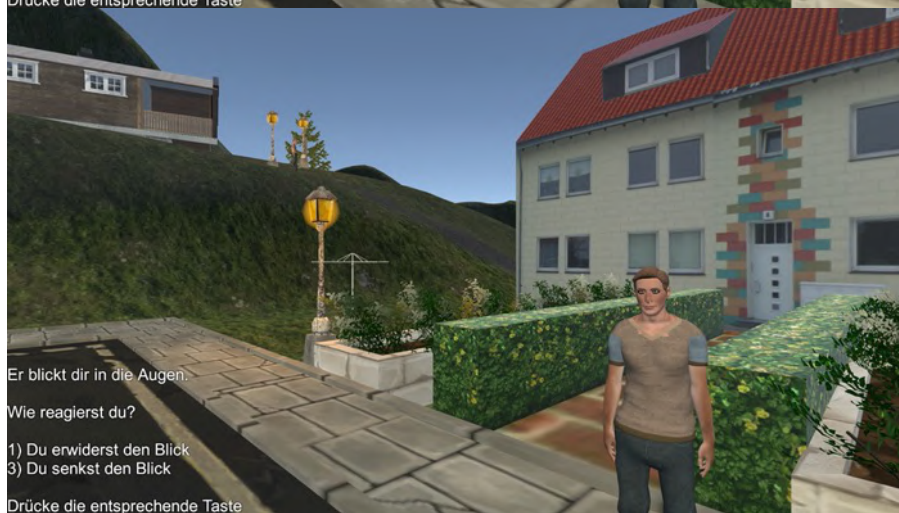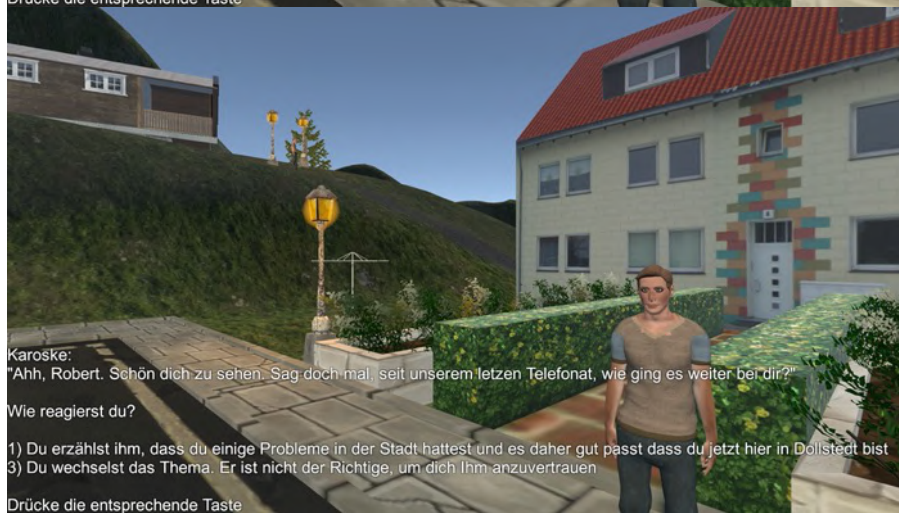

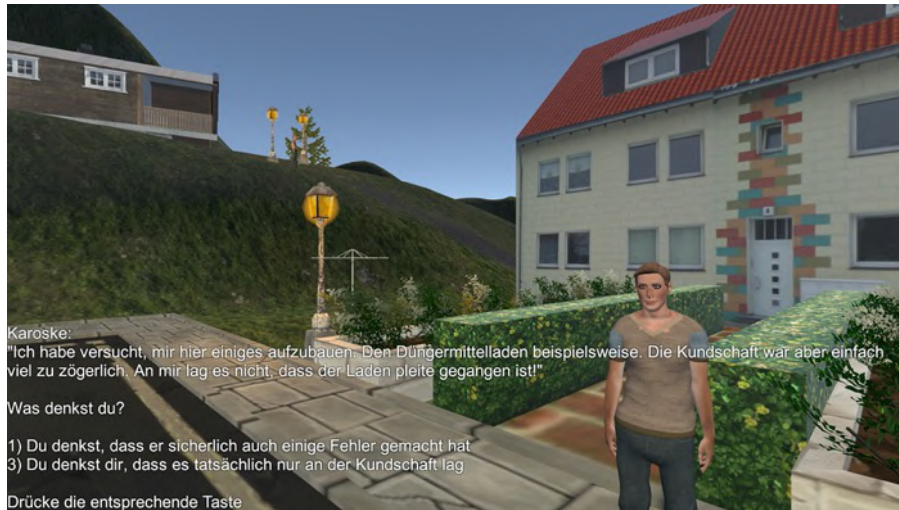

Karoske:

"Ich habe versucht, mir hier einiges aufzubauen. Den Düngermittelladen beispielsweise. Die Kundschaft war aber einfach viel zu zögerlich. An mir lag es nicht, dass der Laden pleite gegangen ist!"

Was denkst du?

- 1) Du denkst, dass er sicherlich auch einige Fehler gemacht hat
- 3) Du denkst dir, dass es tatsächlich nur an der Kundschaft lag

Drücke die entsprechende Taste

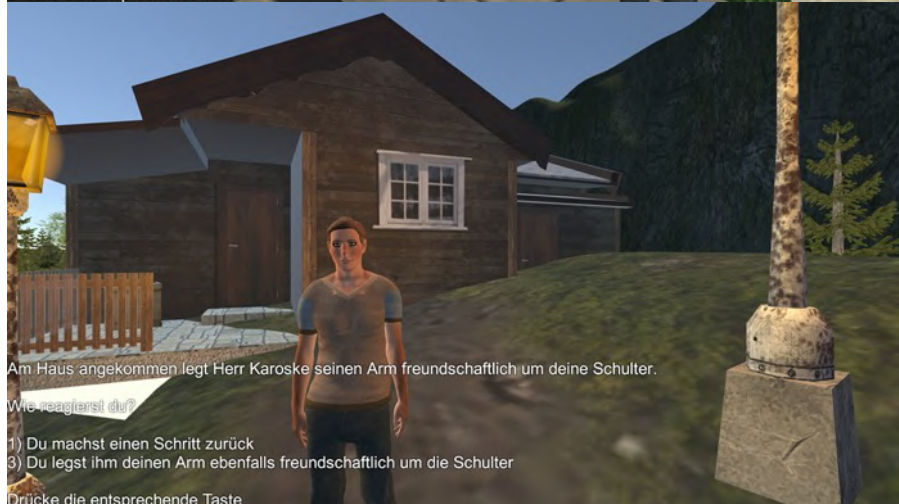

Am Haus angekommen legt Herr Karoske seinen Arm freundschaftlich um deine Schulter.

Wie reagierst du?

- 1) Du machst einen Schritt zurück
- 3) Du legst ihm deinen Arm ebenfalls freundschaftlich um die Schulter

Drücke die entsprechende Taste

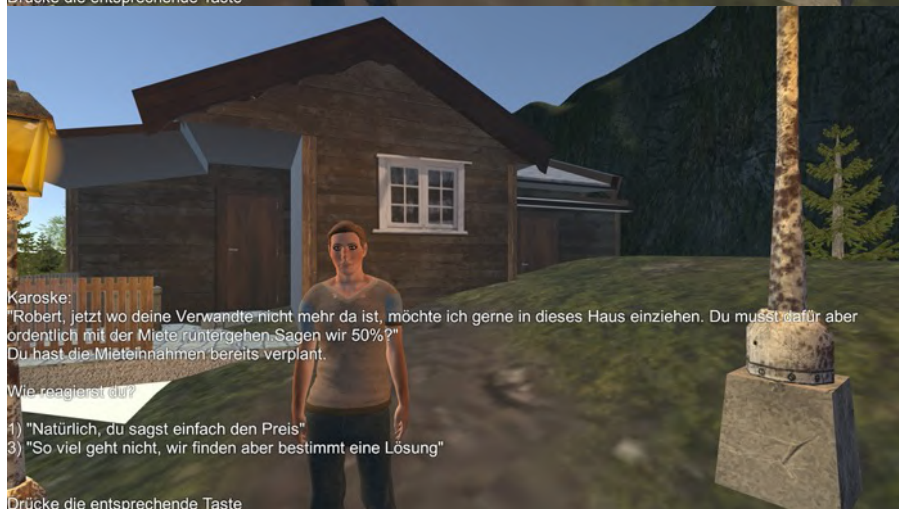

Karoske:

"Robert, jetzt wo deine Verwandte nicht mehr da ist, möchte ich gerne in dieses Haus einziehen. Du musst dafür aber ordentlich mit der Miete runtergehen. Sagen wir 50%?"  
Du hast die Mieteinnahmen bereits verplant.

Wie reagierst du?

- 1) "Natürlich, du sagst einfach den Preis"
- 3) "So viel geht nicht, wir finden aber bestimmt eine Lösung"

Drücke die entsprechende Taste

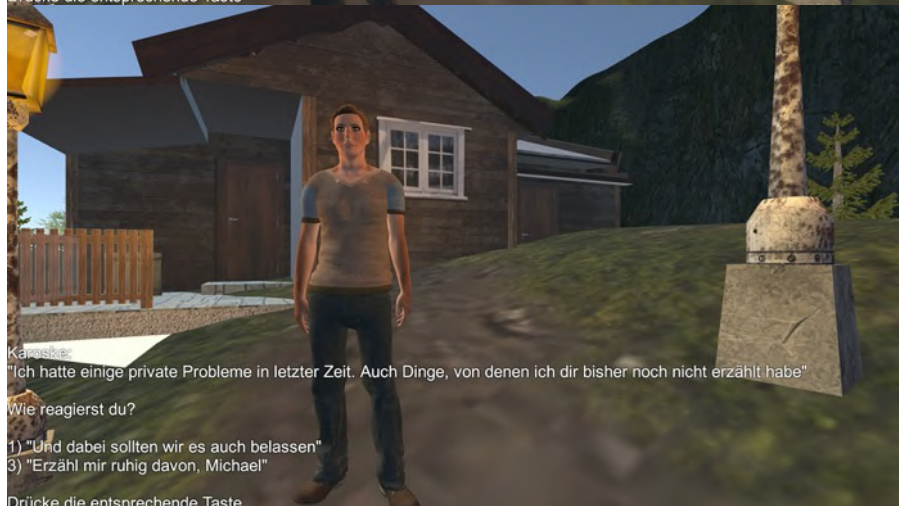

Karoske:

"Ich hatte einige private Probleme in letzter Zeit. Auch Dinge, von denen ich dir bisher noch nicht erzählt habe"

Wie reagierst du?

- 1) "Und dabei sollten wir es auch belassen"
- 3) "Erzähl mir ruhig davon, Michael"

Drücke die entsprechende Taste

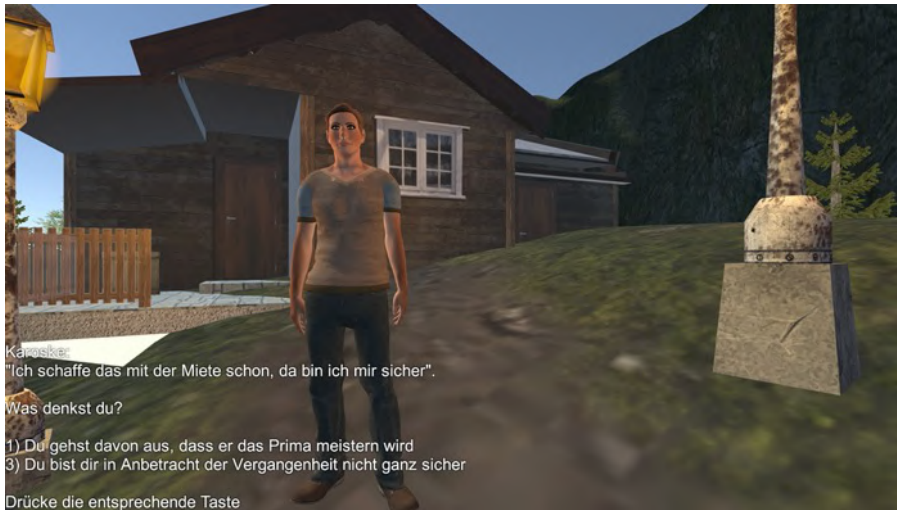

Karoske:

"Ich schaffe das mit der Miete schon, da bin ich mir sicher".

Was denkst du?

- 1) Du gehst davon aus, dass er das Prima meistern wird
- 3) Du bist dir in Anbetracht der Vergangenheit nicht ganz sicher

Drücke die entsprechende Taste

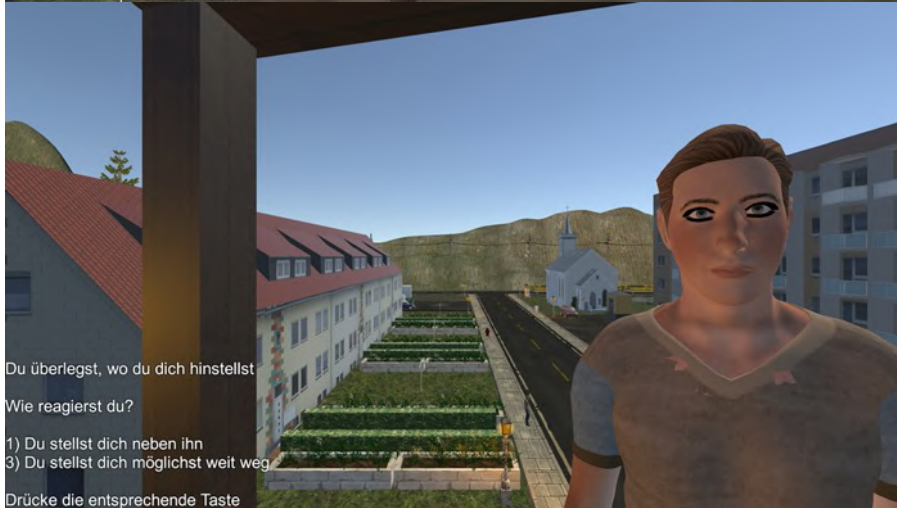

Du überlegst, wo du dich hinstellst

Wie reagierst du?

- 1) Du stellst dich neben ihn
- 3) Du stellst dich möglichst weit weg

Drücke die entsprechende Taste

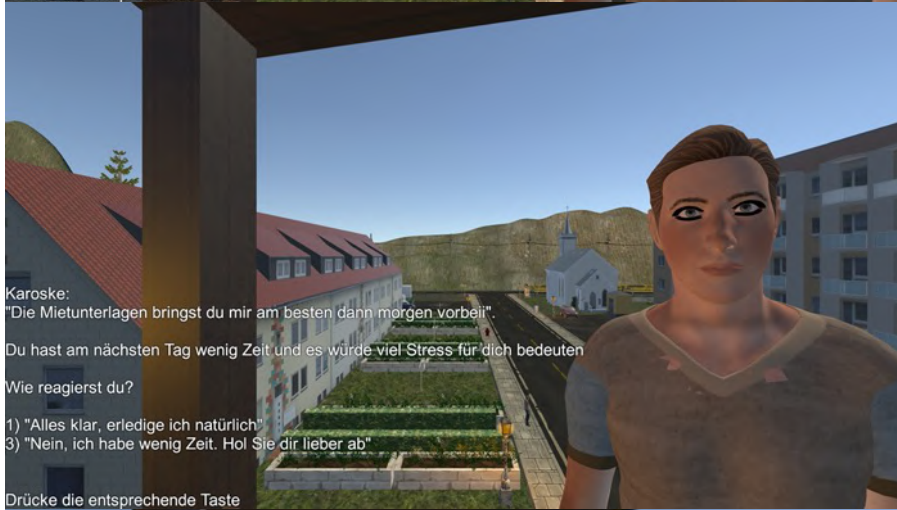

Karoske:

"Die Mietunterlagen bringst du mir am besten dann morgen vorbei".

Du hast am nächsten Tag wenig Zeit und es würde viel Stress für dich bedeuten

Wie reagierst du?

- 1) "Alles klar, erledige ich natürlich"
- 3) "Nein, ich habe wenig Zeit. Hol Sie dir lieber ab"

Drücke die entsprechende Taste

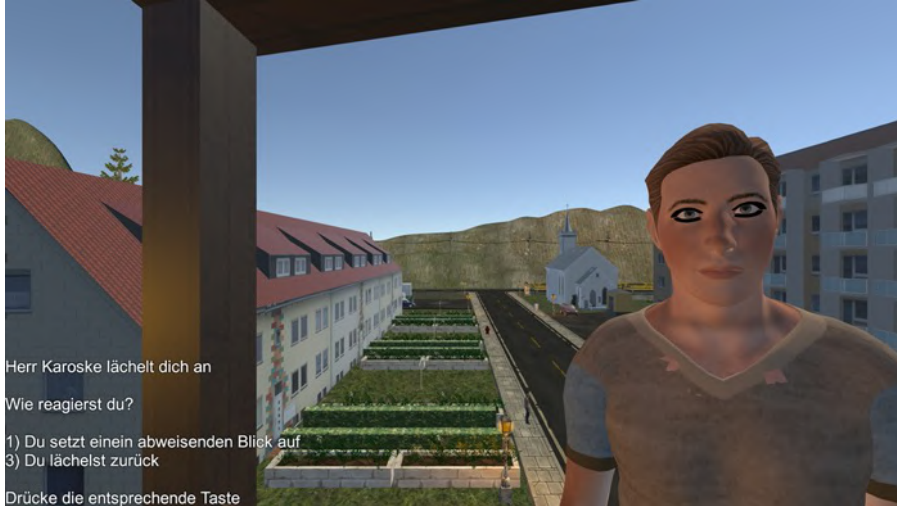

Herr Karoske lächelt dich an

Wie reagierst du?

- 1) Du setzt einen abweisenden Blick auf
- 3) Du lächelst zurück

Drücke die entsprechende Taste

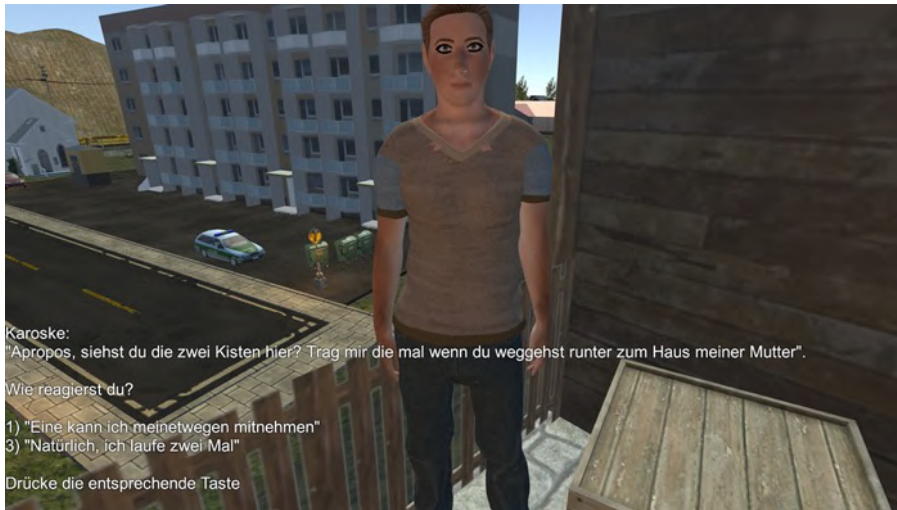

Karoske:  
"Apropos, siehst du die zwei Kisten hier? Trag mir die mal wenn du weggehst runter zum Haus meiner Mutter".

Wie reagierst du?

- 1) "Eine kann ich meinetwegen mitnehmen"
- 3) "Natürlich, ich laufe zwei Mal"

Drücke die entsprechende Taste

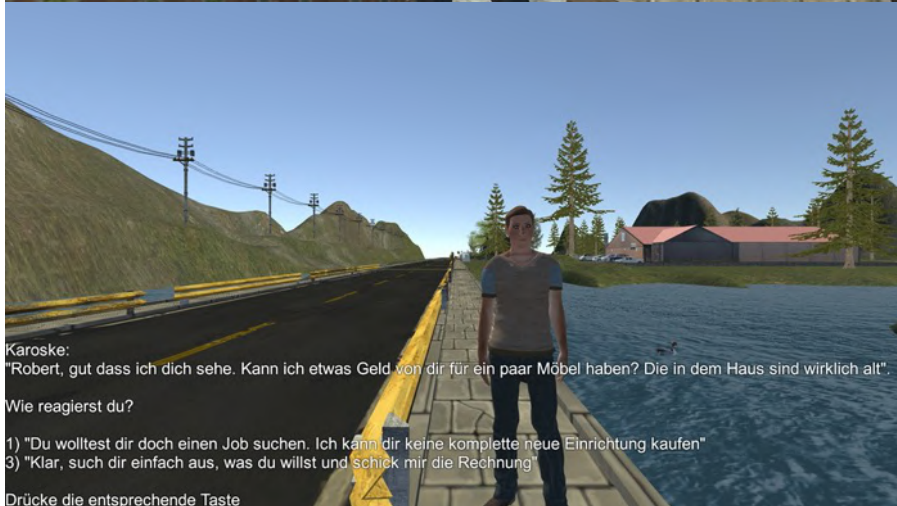

Karoske:  
"Robert, gut dass ich dich sehe. Kann ich etwas Geld von dir für ein paar Möbel haben? Die in dem Haus sind wirklich alt".

Wie reagierst du?

- 1) "Du wolltest dir doch einen Job suchen. Ich kann dir keine komplette neue Einrichtung kaufen"
- 3) "Klar, such dir einfach aus, was du willst und schick mir die Rechnung"

Drücke die entsprechende Taste

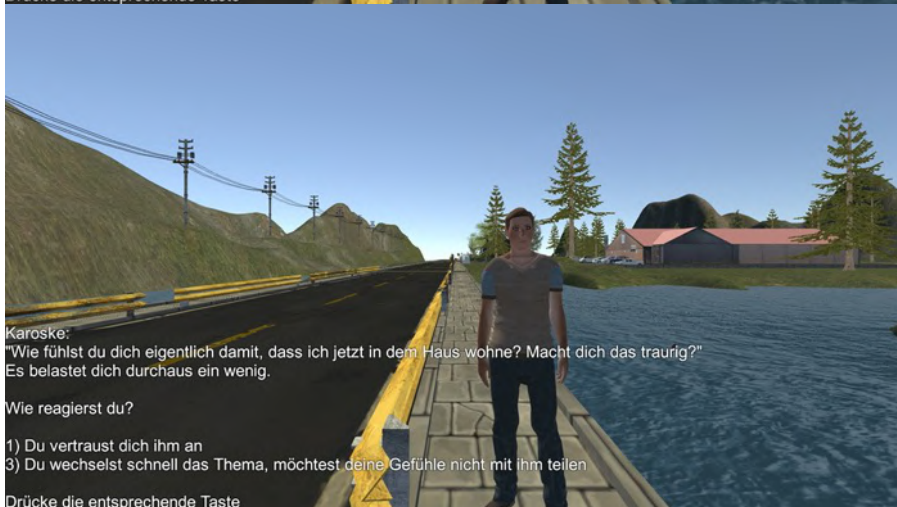

Karoske:  
"Wie fühlst du dich eigentlich damit, dass ich jetzt in dem Haus wohne? Macht dich das traurig?"  
Es belastet dich durchaus ein wenig.

Wie reagierst du?

- 1) Du vertraust dich ihm an
- 3) Du wechselst schnell das Thema, möchtest deine Gefühle nicht mit ihm teilen

Drücke die entsprechende Taste

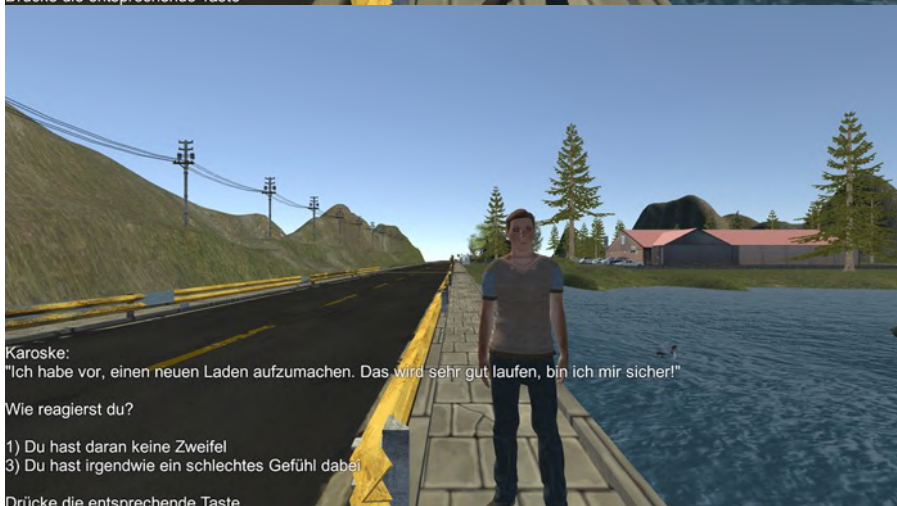

Karoske:  
"Ich habe vor, einen neuen Laden aufzumachen. Das wird sehr gut laufen, bin ich mir sicher!"

Wie reagierst du?

- 1) Du hast daran keine Zweifel
- 3) Du hast irgendwie ein schlechtes Gefühl dabei

Drücke die entsprechende Taste

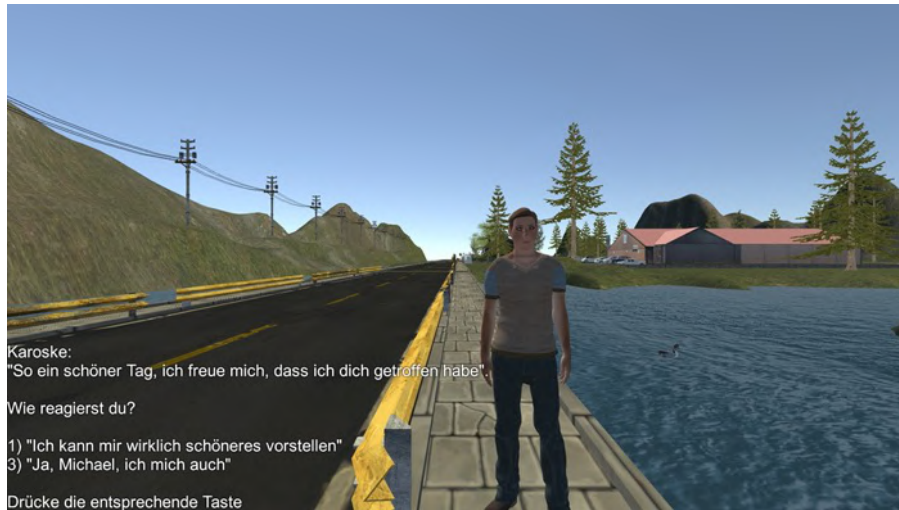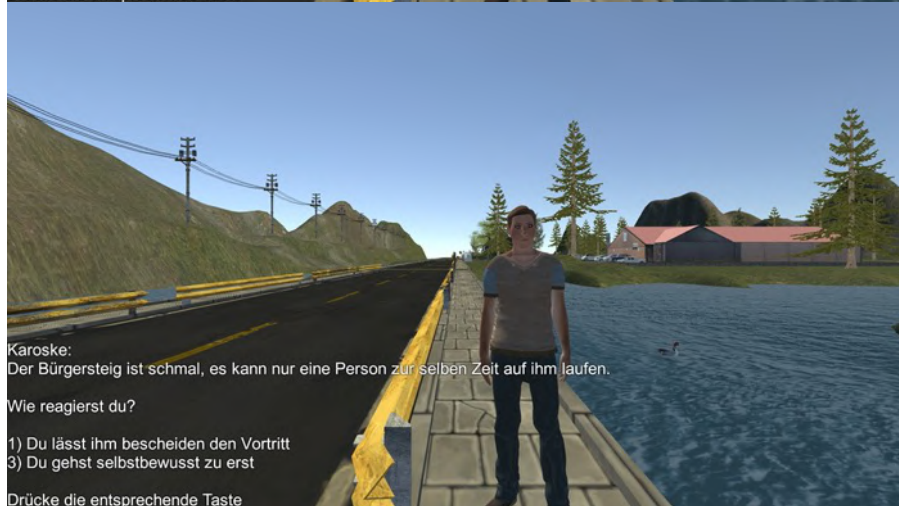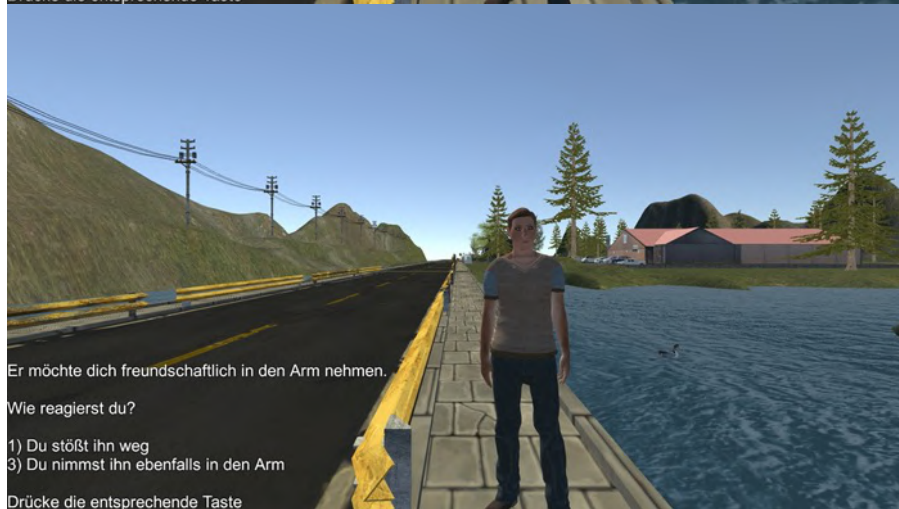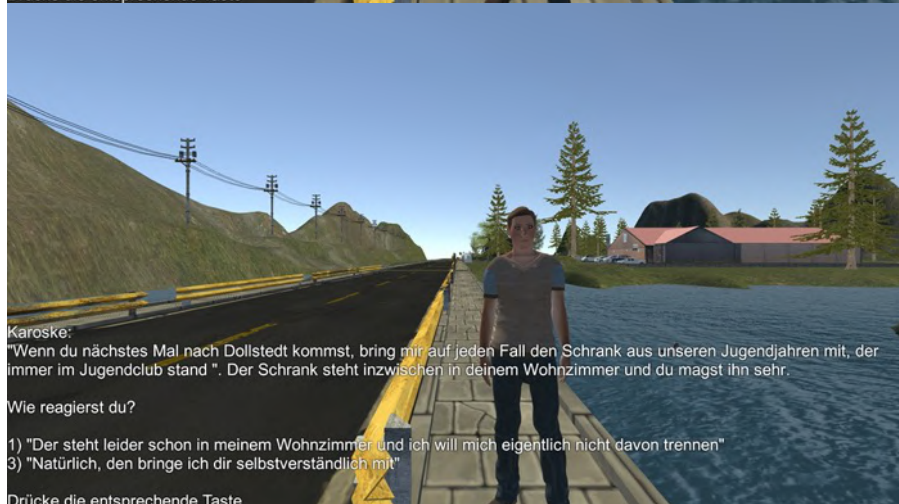



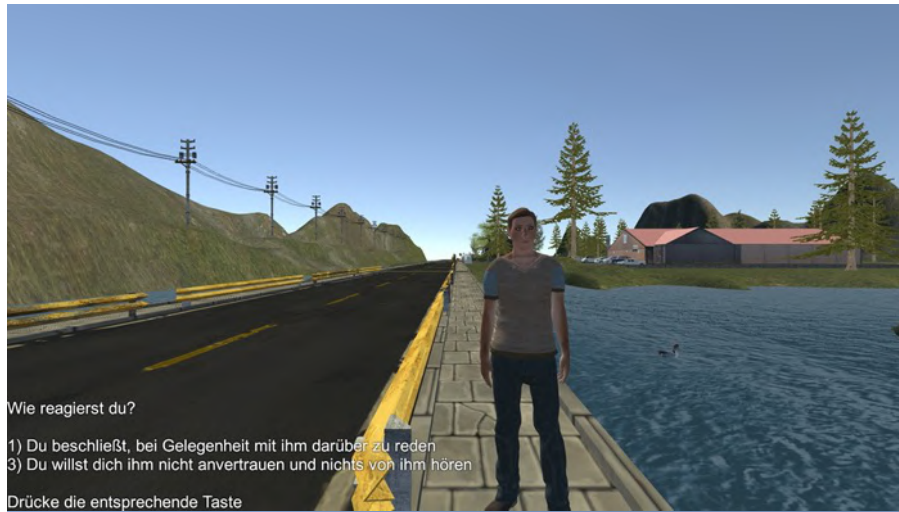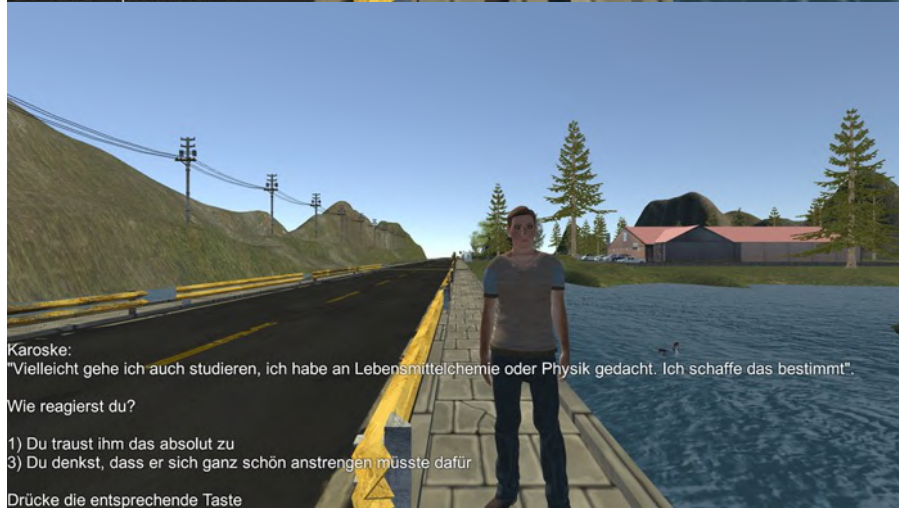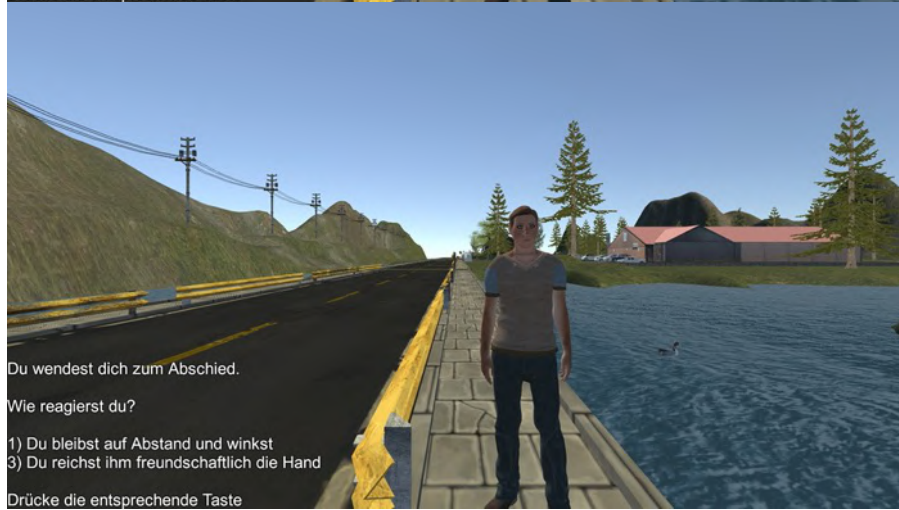

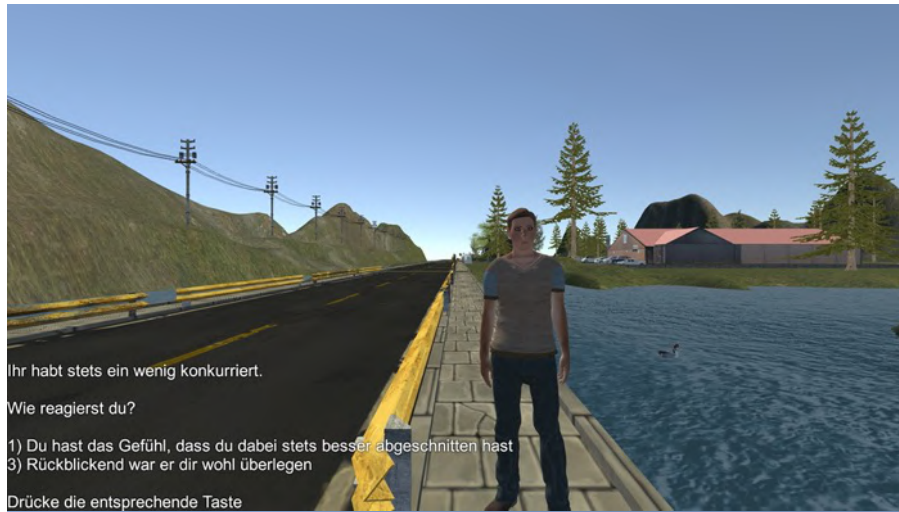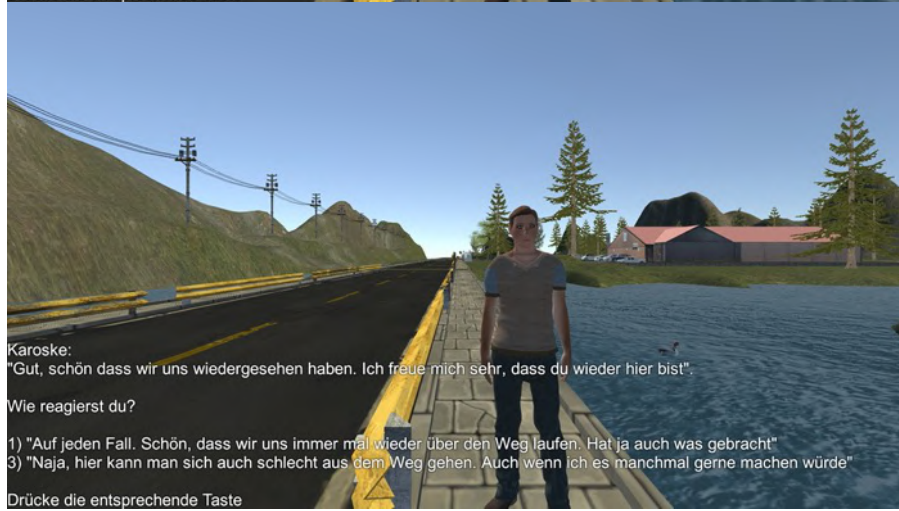

## S5.2 Modification-Phase

### S5.2.1 Lerte (High-Power/Low-Affiliation, Updating-Avatar)

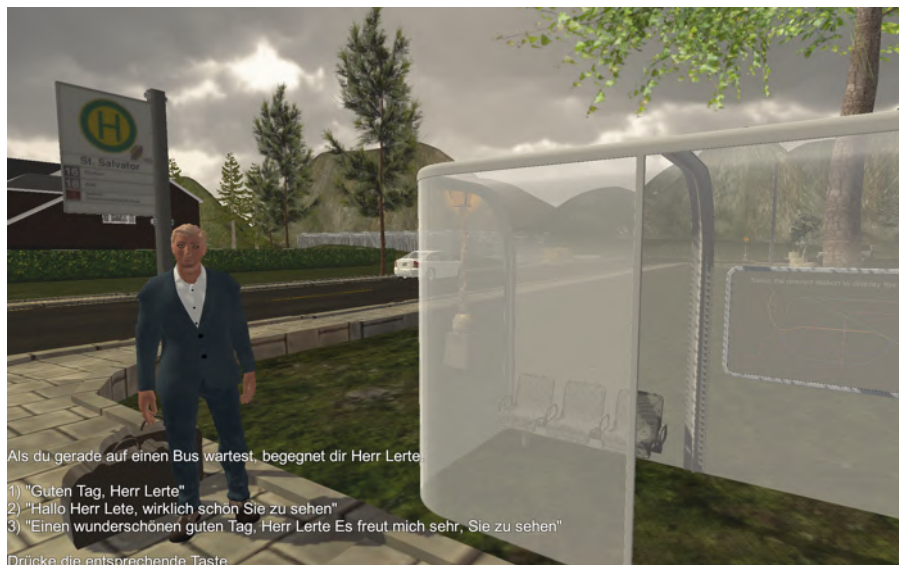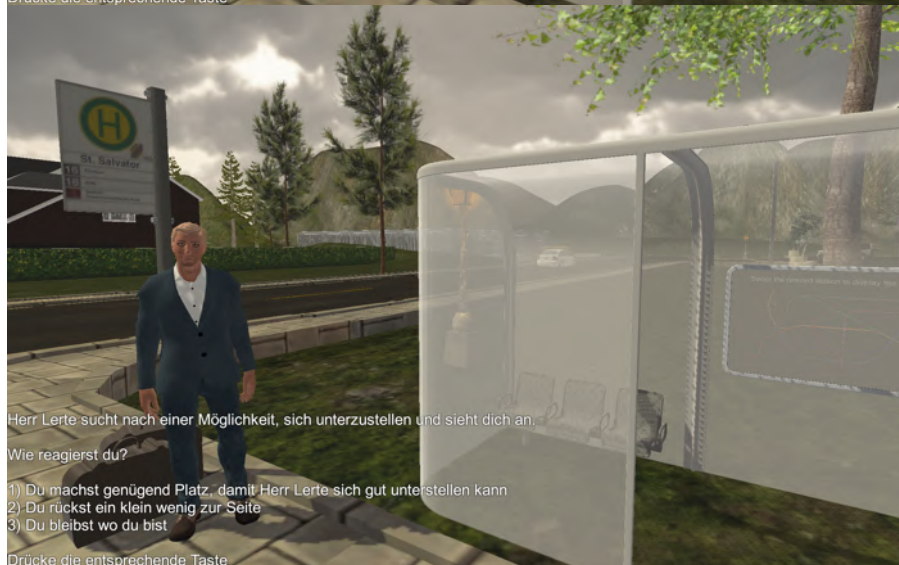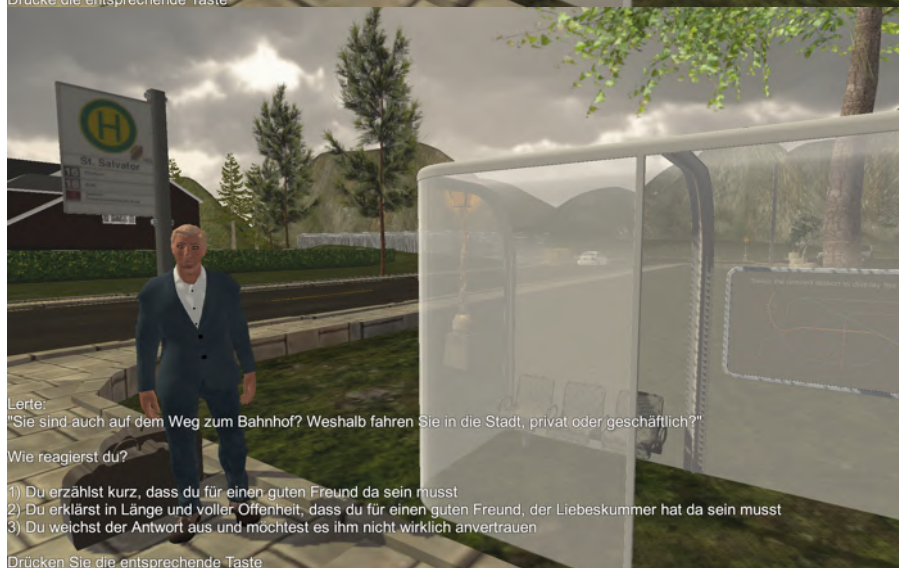

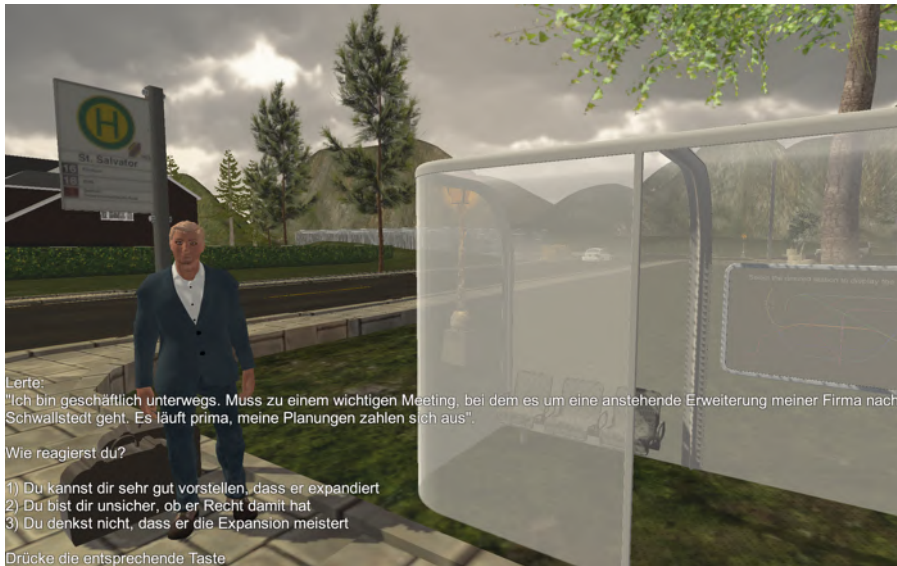

Lerte:

"Ich bin geschäftlich unterwegs. Muss zu einem wichtigen Meeting, bei dem es um eine anstehende Erweiterung meiner Firma nach Schwallstedt geht. Es läuft prima, meine Planungen zahlen sich aus".

Wie reagierst du?

- 1) Du kannst dir sehr gut vorstellen, dass er expandiert
- 2) Du bist dir unsicher, ob er Recht damit hat
- 3) Du denkst nicht, dass er die Expansion meistert

Drücke die entsprechende Taste

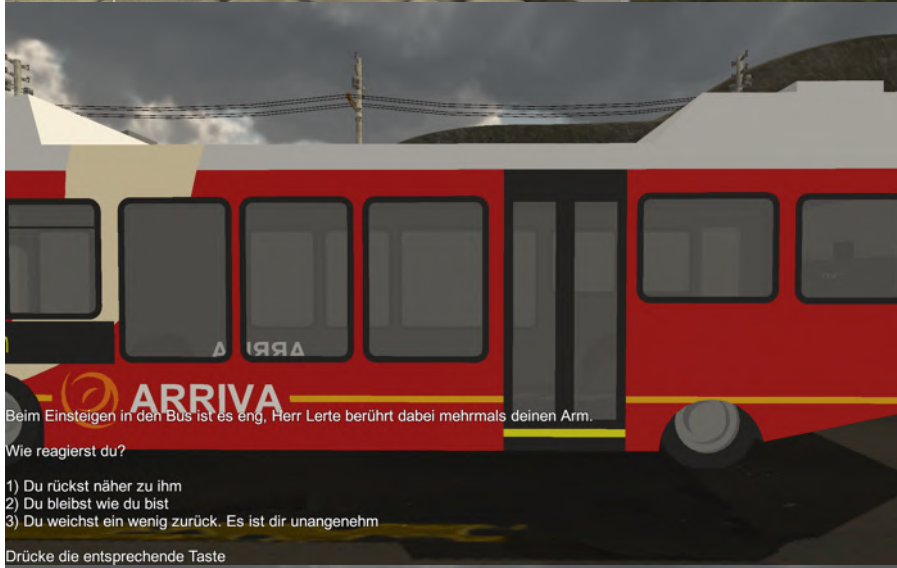

Beim Einsteigen in den Bus ist es eng, Herr Lerte berührt dabei mehrmals deinen Arm.

Wie reagierst du?

- 1) Du rückst näher zu ihm
- 2) Du bleibst wie du bist
- 3) Du weichst ein wenig zurück. Es ist dir unangenehm

Drücke die entsprechende Taste

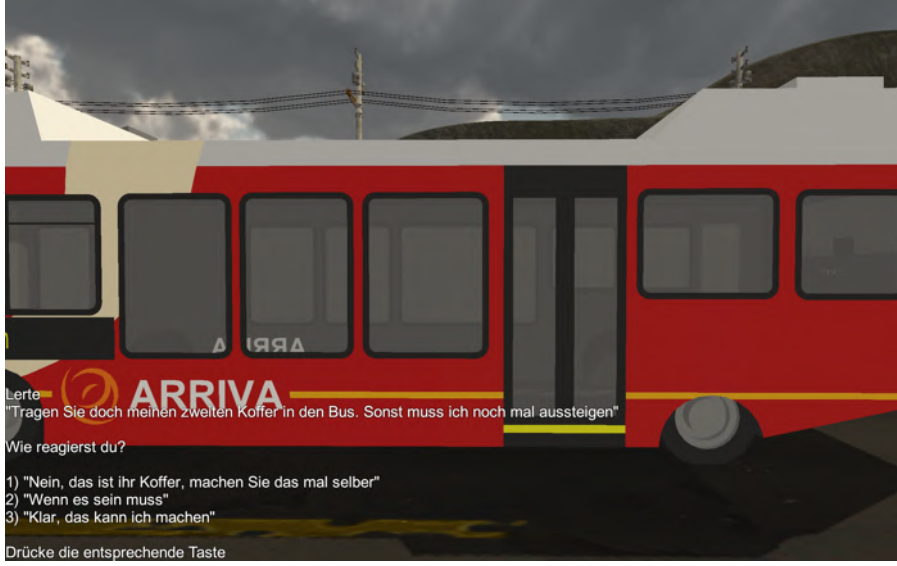

Lerte: "Tragen Sie doch meinen zweiten Koffer in den Bus. Sonst muss ich noch mal aussteigen"

Wie reagierst du?

- 1) "Nein, das ist ihr Koffer, machen Sie das mal selber"
- 2) "Wenn es sein muss"
- 3) "Klar, das kann ich machen"

Drücke die entsprechende Taste

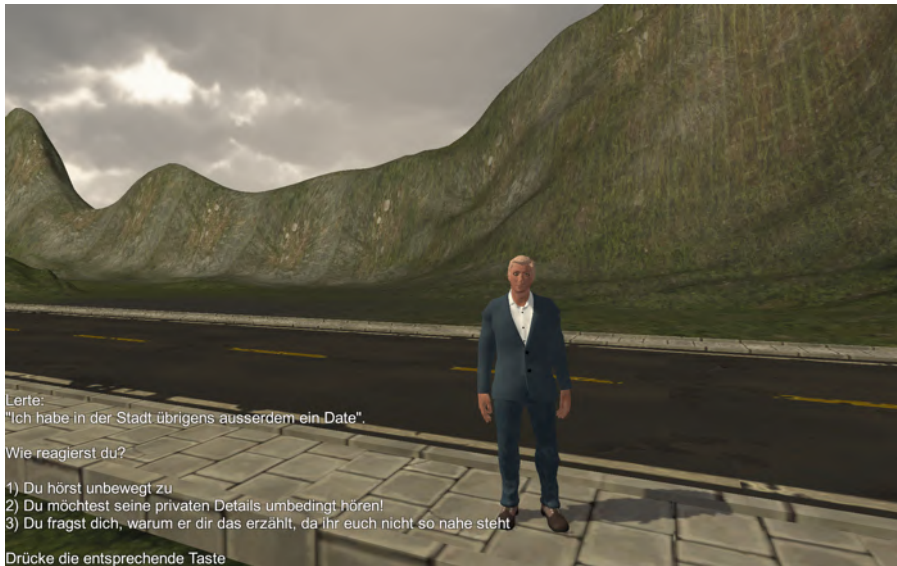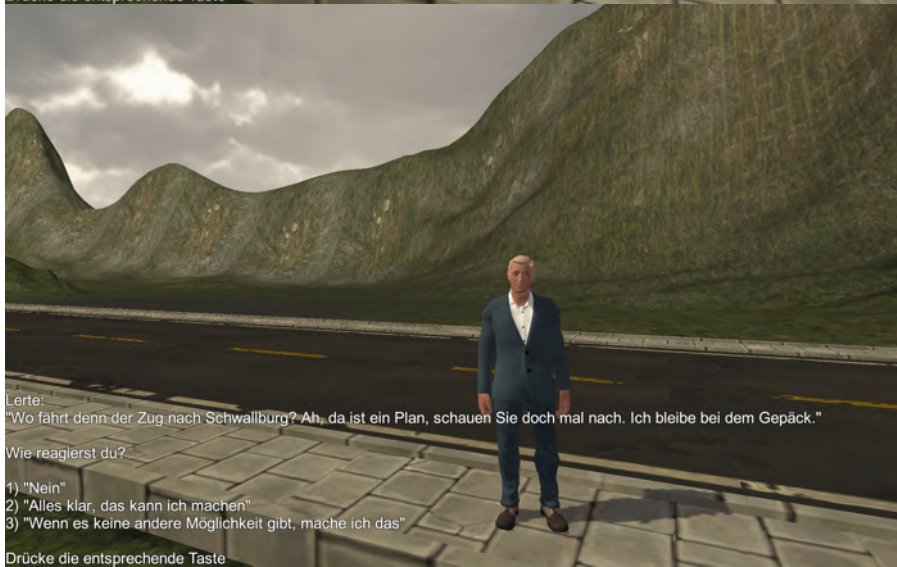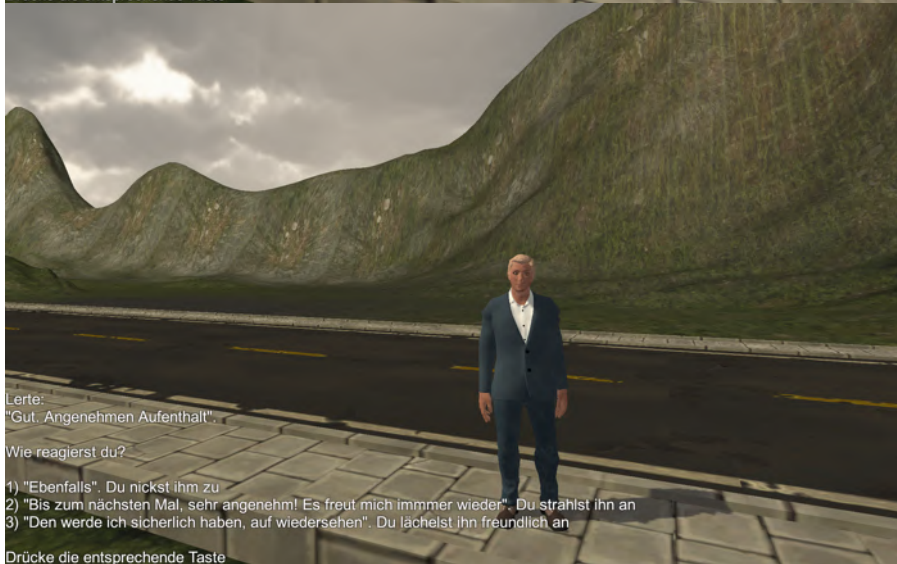

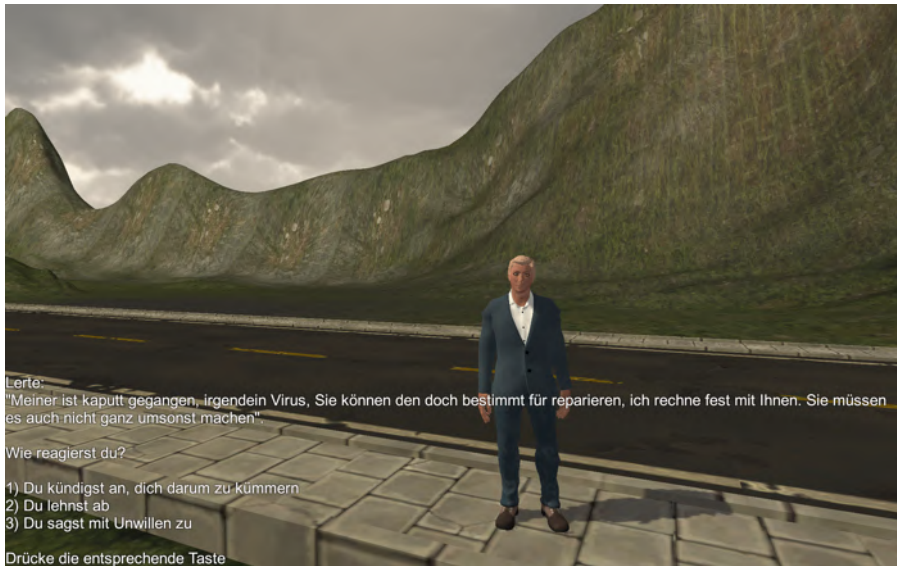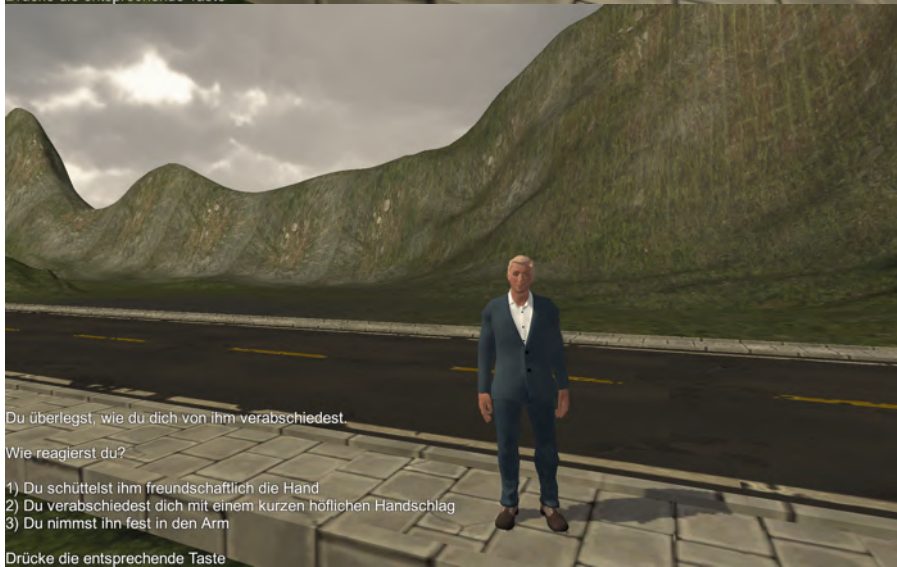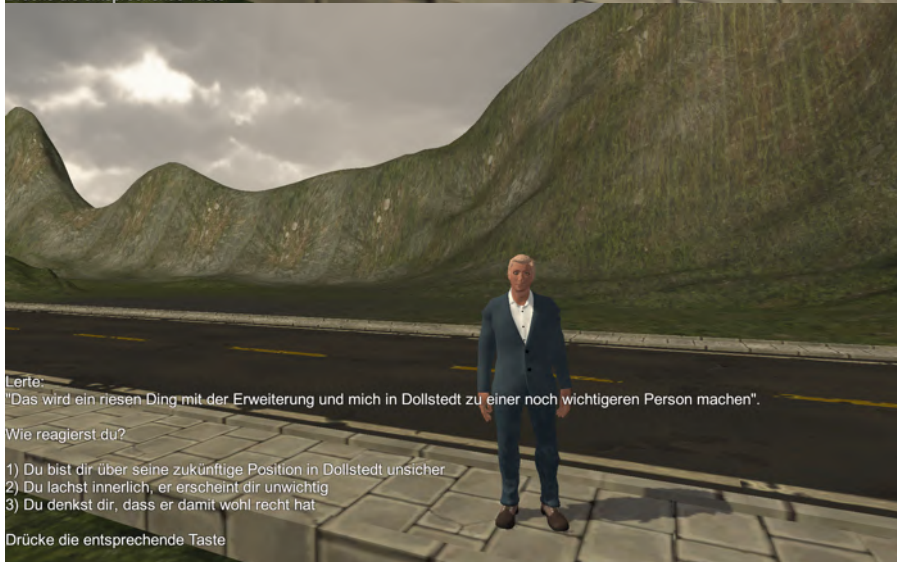

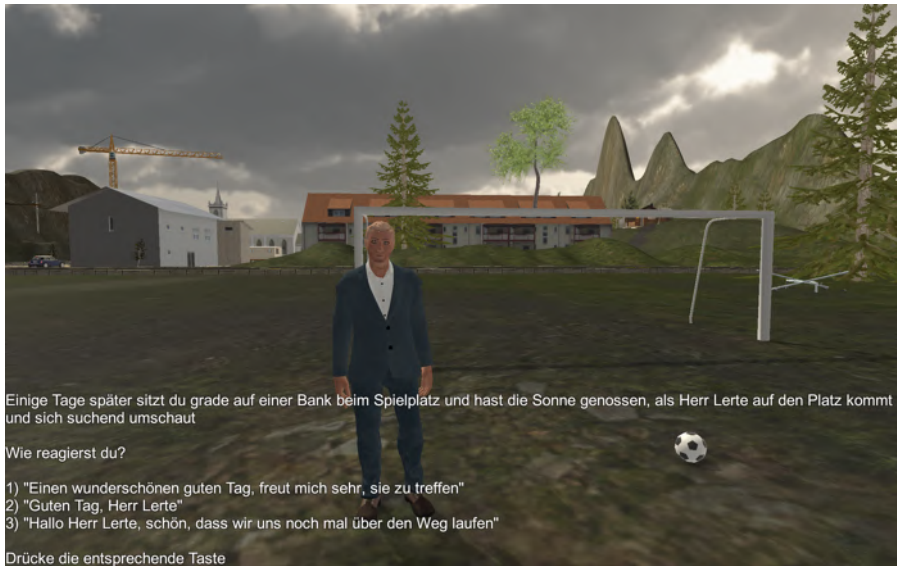

Einige Tage später sitzt du grade auf einer Bank beim Spielplatz und hast die Sonne genossen, als Herr Lerte auf den Platz kommt und sich suchend umschaut

Wie reagierst du?

- 1) "Einen wunderschönen guten Tag, freut mich sehr, sie zu treffen"
- 2) "Guten Tag, Herr Lerte"
- 3) "Hallo Herr Lerte, schön, dass wir uns noch mal über den Weg laufen"

Drücke die entsprechende Taste

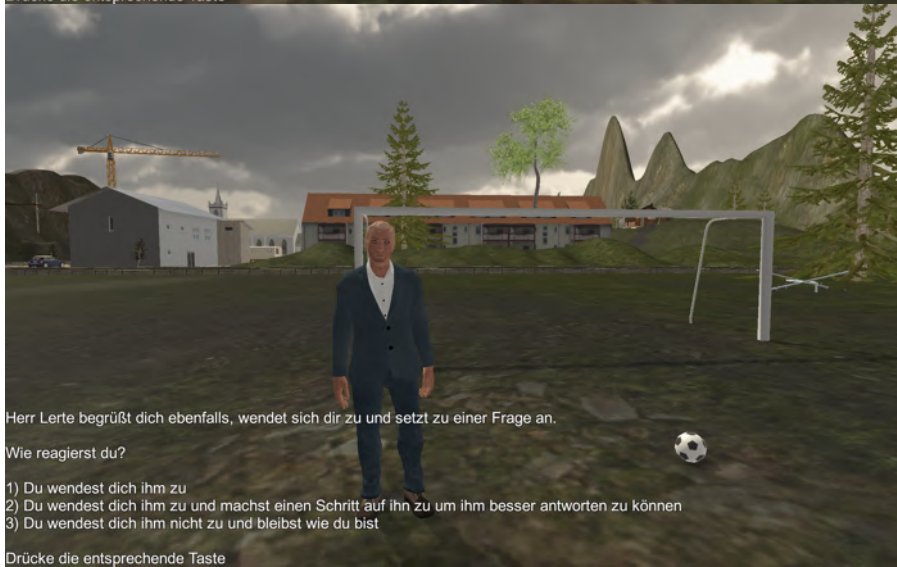

Herr Lerte begrüßt dich ebenfalls, wendet sich dir zu und setzt zu einer Frage an.

Wie reagierst du?

- 1) Du wendest dich ihm zu
- 2) Du wendest dich ihm zu und machst einen Schritt auf ihn zu um ihm besser antworten zu können
- 3) Du wendest dich ihm nicht zu und bleibst wie du bist

Drücke die entsprechende Taste

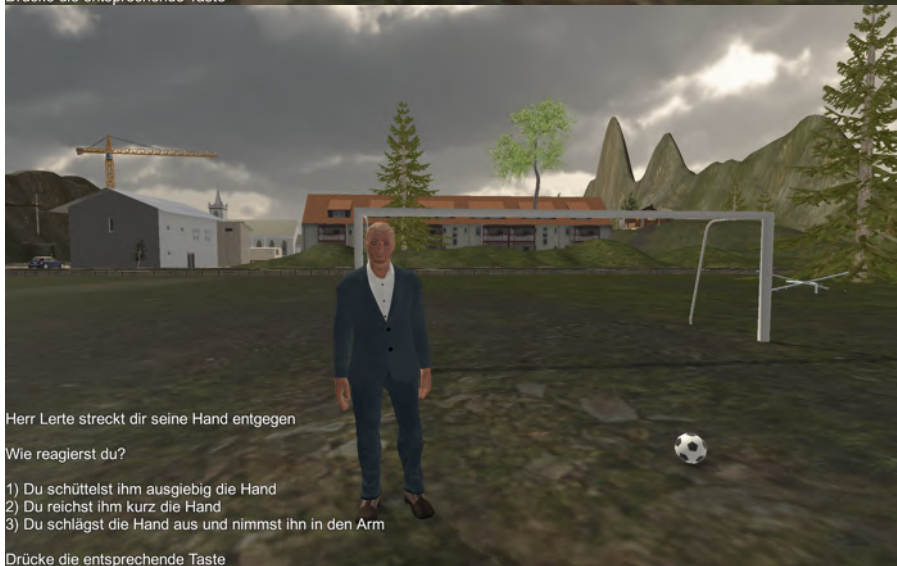

Herr Lerte streckt dir seine Hand entgegen

Wie reagierst du?

- 1) Du schüttelst ihm ausgiebig die Hand
- 2) Du reichst ihm kurz die Hand
- 3) Du schlägst die Hand aus und nimmst ihn in den Arm

Drücke die entsprechende Taste

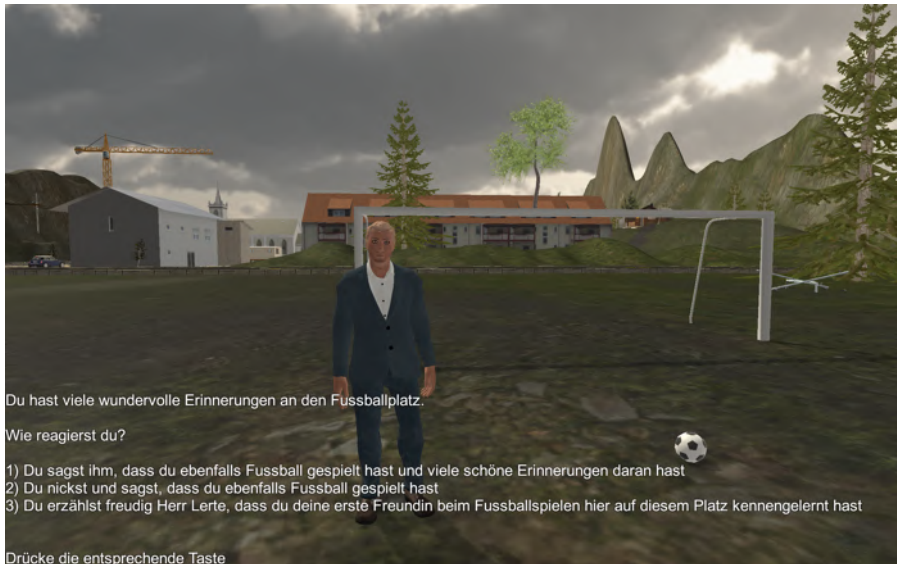

Du hast viele wundervolle Erinnerungen an den Fussballplatz.

Wie reagierst du?

- 1) Du sagst ihm, dass du ebenfalls Fussball gespielt hast und viele schöne Erinnerungen daran hast
- 2) Du nickst und sagst, dass du ebenfalls Fussball gespielt hast
- 3) Du erzählst freudig Herr Lerte, dass du deine erste Freundin beim Fussballspielen hier auf diesem Platz kennengelernt hast

Drücke die entsprechende Taste

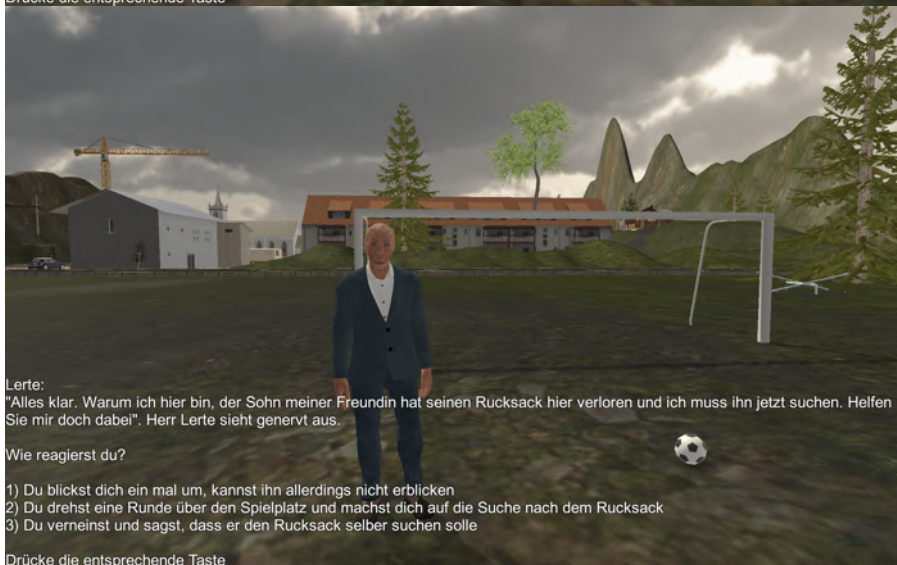

Lerte:

"Alles klar. Warum ich hier bin, der Sohn meiner Freundin hat seinen Rucksack hier verloren und ich muss ihn jetzt suchen. Helfen Sie mir doch dabei". Herr Lerte sieht genervt aus.

Wie reagierst du?

- 1) Du blickst dich ein mal um, kannst ihn allerdings nicht erblicken
- 2) Du drehst eine Runde über den Spielplatz und machst dich auf die Suche nach dem Rucksack
- 3) Du verneinst und sagst, dass er den Rucksack selber suchen sollte

Drücke die entsprechende Taste

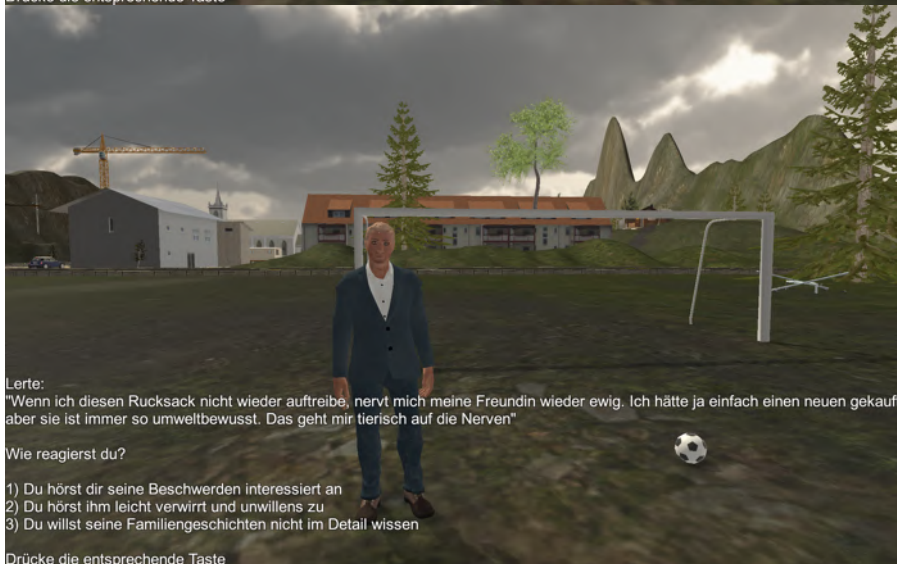

Lerte:

"Wenn ich diesen Rucksack nicht wieder auftreibe, nervt mich meine Freundin wieder ewig. Ich hätte ja einfach einen neuen gekauft, aber sie ist immer so umweltbewusst. Das geht mir tierisch auf die Nerven"

Wie reagierst du?

- 1) Du hörst dir seine Beschwerden interessiert an
- 2) Du hörst ihm leicht verwirrt und unwillens zu
- 3) Du willst seine Familiengeschichten nicht im Detail wissen

Drücke die entsprechende Taste



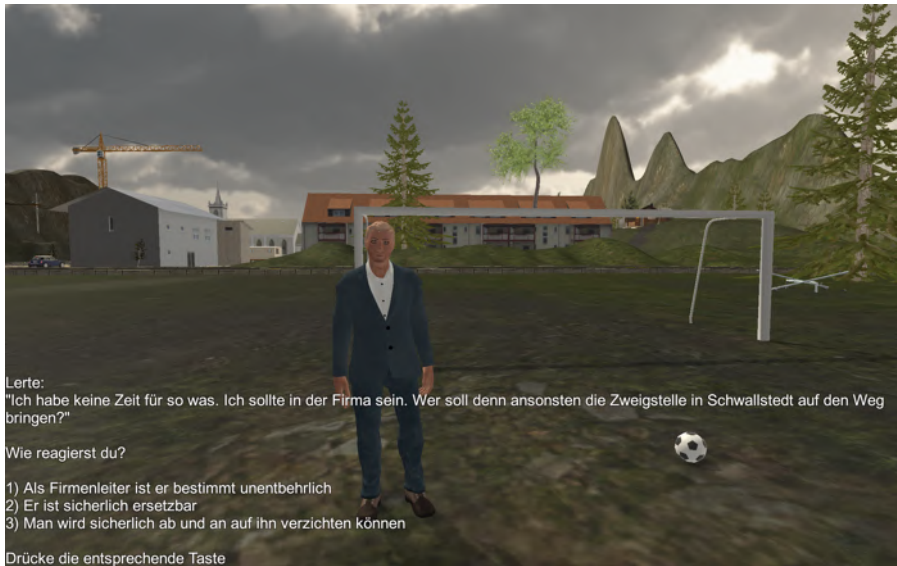

Lerte:  
"Ich habe keine Zeit für so was. Ich sollte in der Firma sein. Wer soll denn ansonsten die Zweigstelle in Schwallstedt auf den Weg bringen?"

Wie reagierst du?

- 1) Als Firmenleiter ist er bestimmt unentbehrlich
- 2) Er ist sicherlich ersetzbar
- 3) Man wird sicherlich ab und an auf ihn verzichten können

Drücke die entsprechende Taste

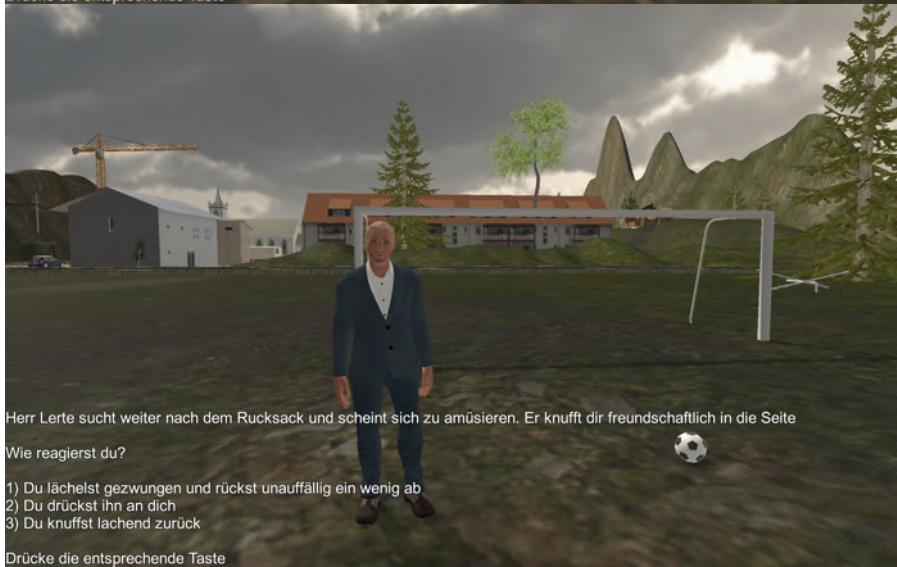

Herr Lerte sucht weiter nach dem Rucksack und scheint sich zu amüsieren. Er knufft dir freundschaftlich in die Seite

Wie reagierst du?

- 1) Du lächelst gezwungen und rückst unauffällig ein wenig ab
- 2) Du drückst ihn an dich
- 3) Du knuffst lachend zurück

Drücke die entsprechende Taste

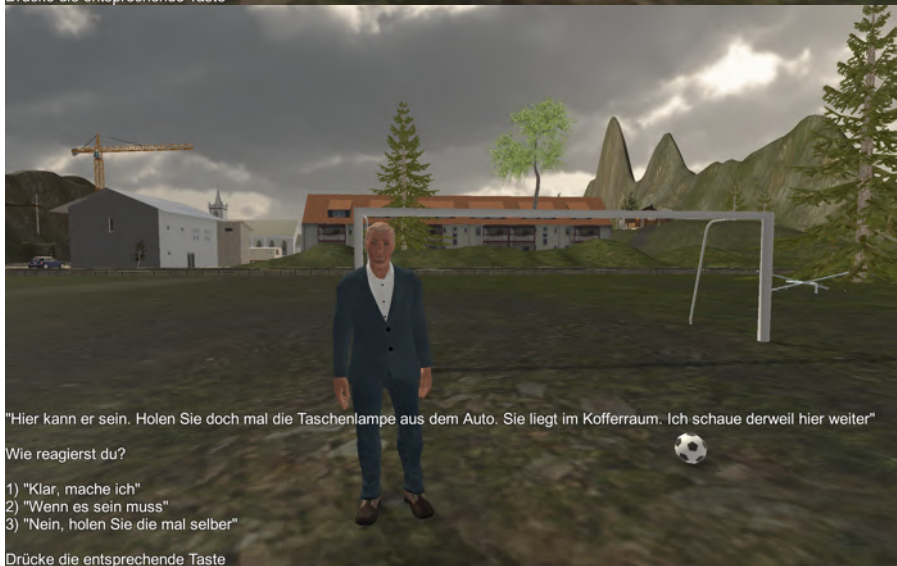

"Hier kann er sein. Holen Sie doch mal die Taschenlampe aus dem Auto. Sie liegt im Kofferraum. Ich schaue derweil hier weiter"

Wie reagierst du?

- 1) "Klar, mache ich"
- 2) "Wenn es sein muss"
- 3) "Nein, holen Sie die mal selber"

Drücke die entsprechende Taste

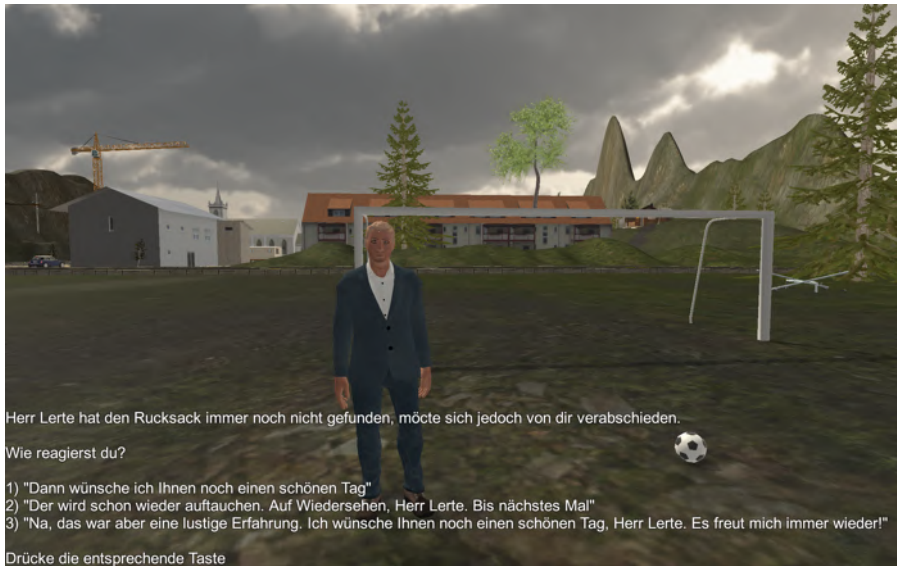

Herr Lerte hat den Rucksack immer noch nicht gefunden, möchte sich jedoch von dir verabschieden.

Wie reagierst du?

- 1) "Dann wünsche ich Ihnen noch einen schönen Tag"
- 2) "Der wird schon wieder auftauchen. Auf Wiedersehen, Herr Lerte. Bis nächstes Mal"
- 3) "Na, das war aber eine lustige Erfahrung. Ich wünsche Ihnen noch einen schönen Tag, Herr Lerte. Es freut mich immer wieder!"

Drücke die entsprechende Taste

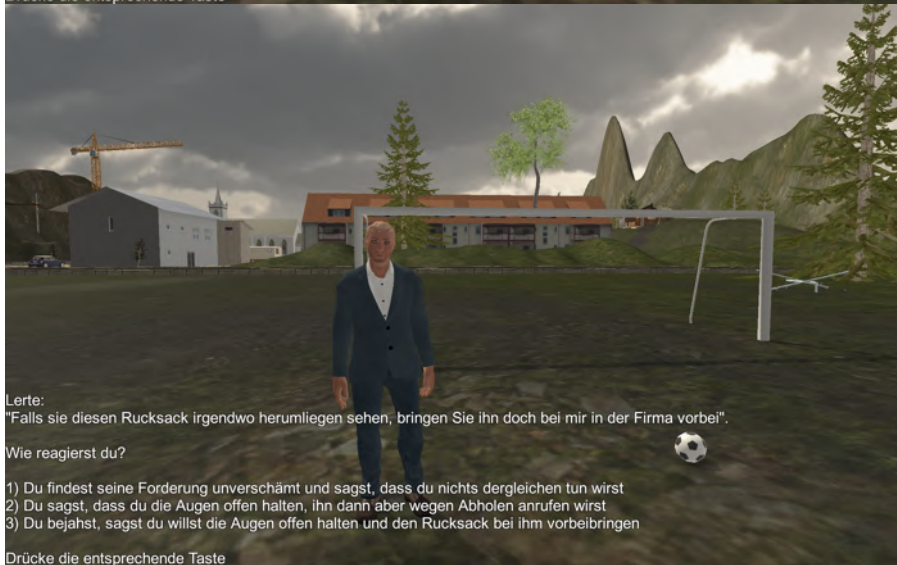

Lerte:

"Falls sie diesen Rucksack irgendwo herumliegen sehen, bringen Sie ihn doch bei mir in der Firma vorbei".

Wie reagierst du?

- 1) Du findest seine Forderung unverschämt und sagst, dass du nichts dergleichen tun wirst
- 2) Du sagst, dass du die Augen offen halten, ihn dann aber wegen Abholen anrufen wirst
- 3) Du bejahst, sagst du willst die Augen offen halten und den Rucksack bei ihm vorbeibringen

Drücke die entsprechende Taste

## S5.2.2 Hoekenburg (High-Power/Low-Affiliation, Remapping-Avatar)



Du klingelst und hörst Herr Hoekenburg in der Gegensprechanlage. Er meldet sich.  
Wie reagierst du?

- 1) "Guten Tag". Sagst du professionell.
- 2) "Hallo, Herr Hoekenburg!". Meldest du dich höflich.
- 3) "Hallo, Herr Hoekenburg, schön, Sie wieder zu hören". Erwidertest du freundlich.

Drücke die entsprechende Taste

Hoekenburg:  
"Grade passt es bei mir nicht so gut, kommen Sie doch in einer Stunde wieder".

Wie reagierst du?

- 1) "Ich bin extra hierher gekommen um etwas mit Ihnen zu klären, es würde mich freuen"
- 2) "Wenn es sein muss"
- 3) "Natürlich, wenn Sie wollen"

Drücke die entsprechende Taste

Hoekenburg:  
"Bei mir hat sich in letzter Zeit einiges getanverändert.. hmm... Manchmal ist es ziemlich schwer".

Wie reagierst du?

- 1) Du hörst höflich zu, bewahrst aber gedankliche Distanz
- 2) Du möchtest es nicht hören, es ist dir unangenehm und du wechselst das Thema
- 3) Du wendest dich zu ihm und hörst ihm aufmerksam und mitfühlend zu

Drücken Sie die entsprechende Taste

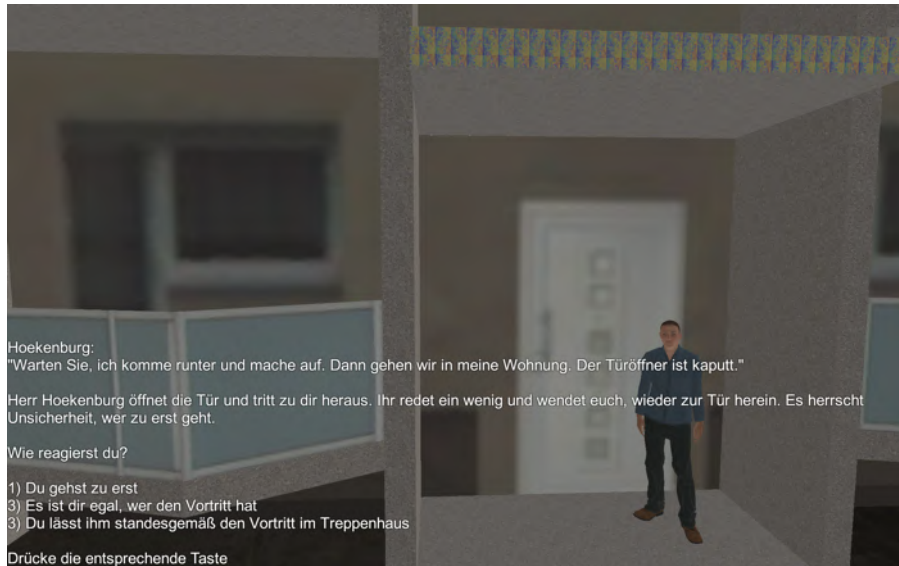

Hoekenburg:  
"Warten Sie, ich komme runter und mache auf. Dann gehen wir in meine Wohnung. Der Türöffner ist kaputt."

Herr Hoekenburg öffnet die Tür und tritt zu dir heraus. Ihr redet ein wenig und wendet euch, wieder zur Tür herein. Es herrscht Unsicherheit, wer zu erst geht.

Wie reagierst du?

- 1) Du gehst zu erst
- 3) Es ist dir egal, wer den Vortritt hat
- 3) Du lässt ihm standesgemäß den Vortritt im Treppenhaus

Drücke die entsprechende Taste

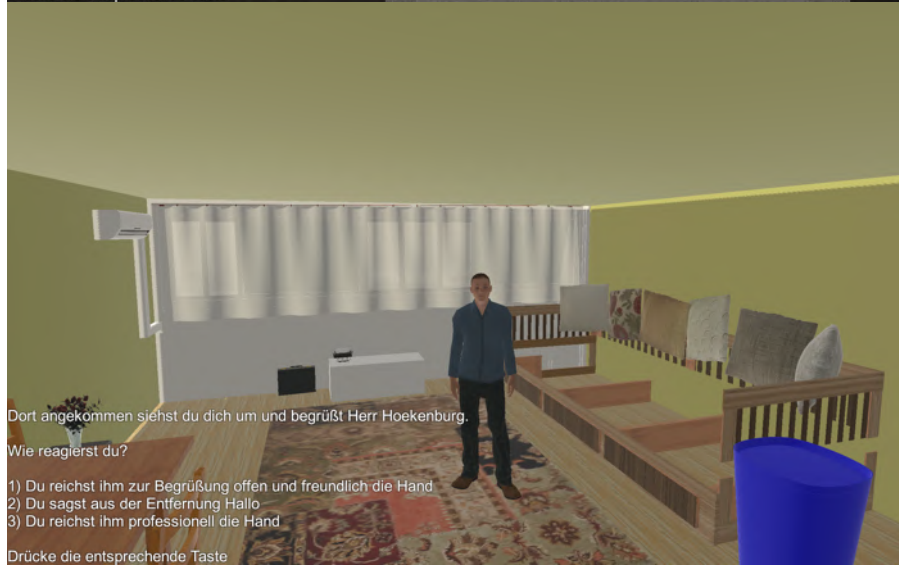

Dort angekommen siehst du dich um und begrüßt Herr Hoekenburg.

Wie reagierst du?

- 1) Du reichst ihm zur Begrüßung offen und freundlich die Hand
- 2) Du sagst aus der Entfernung Hallo
- 3) Du reichst ihm professionell die Hand

Drücke die entsprechende Taste

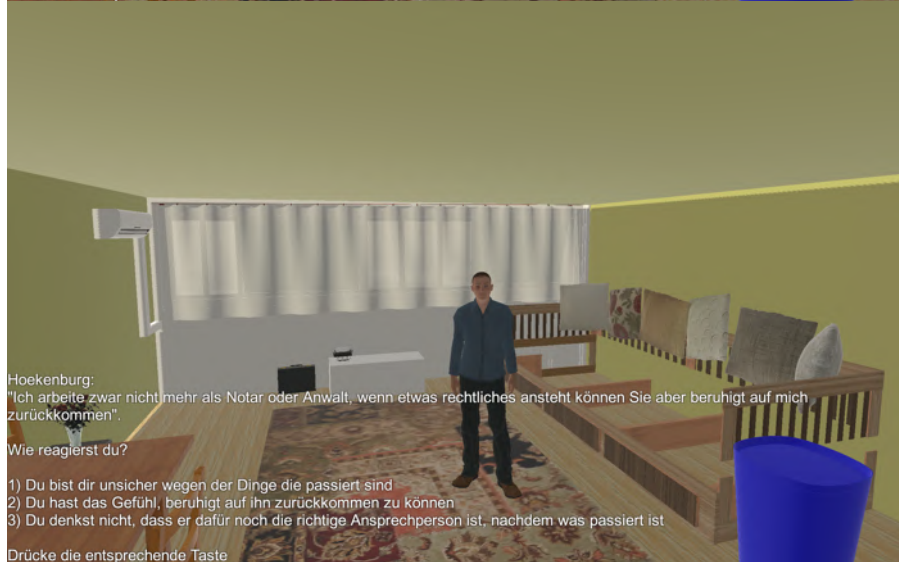

Hoekenburg:  
"Ich arbeite zwar nicht mehr als Notar oder Anwalt, wenn etwas rechtliches ansteht können Sie aber beruhigt auf mich zurückkommen".

Wie reagierst du?

- 1) Du bist dir unsicher wegen der Dinge die passiert sind
- 2) Du hast das Gefühl, beruhigt auf ihn zurückkommen zu können
- 3) Du denkst nicht, dass er dafür noch die richtige Ansprechperson ist, nachdem was passiert ist

Drücke die entsprechende Taste

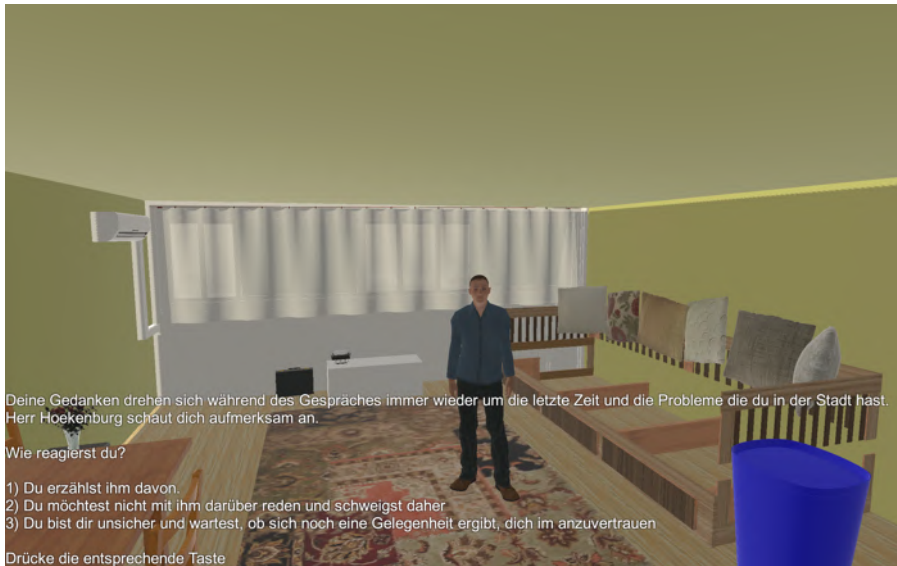

Deine Gedanken drehen sich während des Gespräches immer wieder um die letzte Zeit und die Probleme die du in der Stadt hast. Herr Hoekenburg schaut dich aufmerksam an.

Wie reagierst du?

- 1) Du erzählst ihm davon.
- 2) Du möchtest nicht mit ihm darüber reden und schweigst daher
- 3) Du bist dir unsicher und wartest, ob sich noch eine Gelegenheit ergibt, dich im anzuvertrauen

Drücke die entsprechende Taste

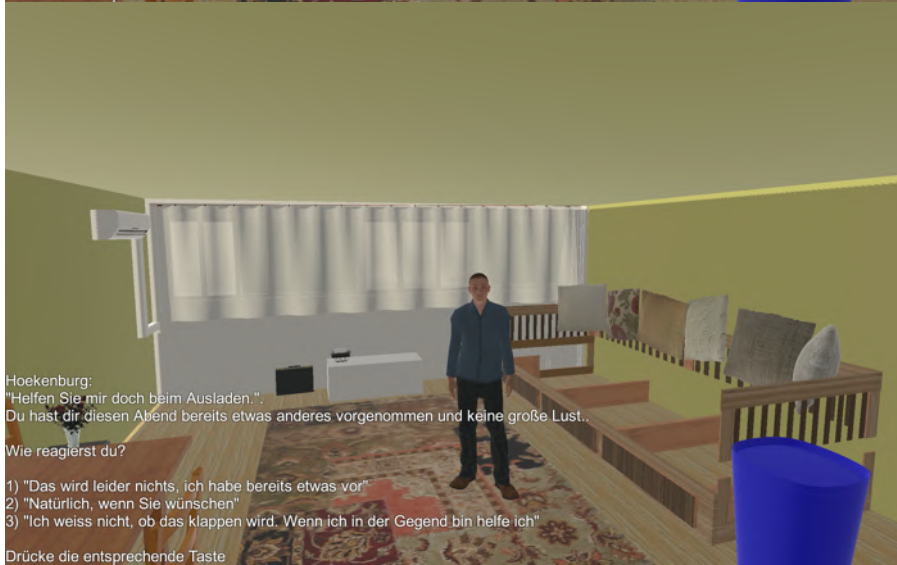

Hoekenburg:  
"Helfen Sie mir doch beim Ausladen."  
Du hast dir diesen Abend bereits etwas anderes vorgenommen und keine große Lust..

Wie reagierst du?

- 1) "Das wird leider nichts, ich habe bereits etwas vor"
- 2) "Natürlich, wenn Sie wünschen"
- 3) "Ich weiss nicht, ob das klappen wird. Wenn ich in der Gegend bin helfe ich"

Drücke die entsprechende Taste

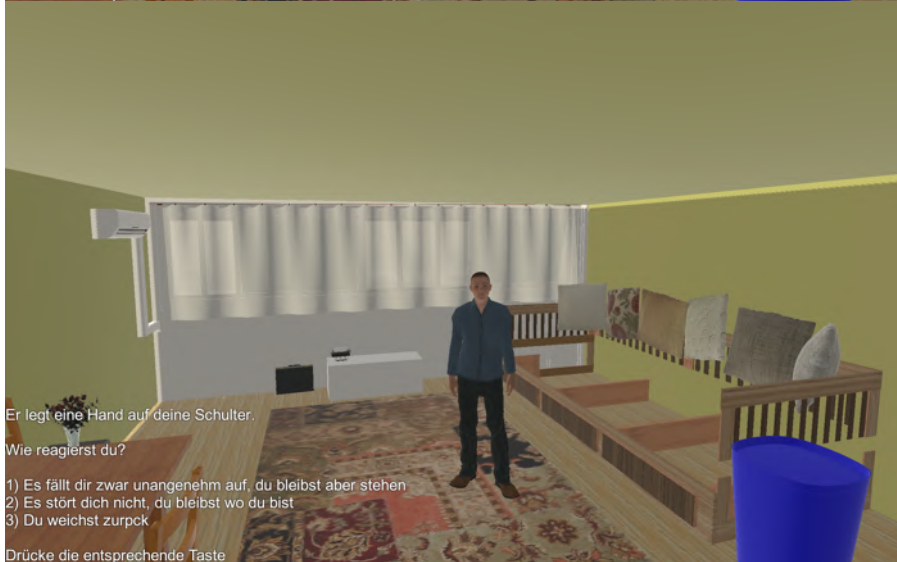

Er legt eine Hand auf deine Schulter.

Wie reagierst du?

- 1) Es fällt dir zwar unangenehm auf, du bleibst aber stehen
- 2) Es stört dich nicht, du bleibst wo du bist
- 3) Du weichst zurpck

Drücke die entsprechende Taste

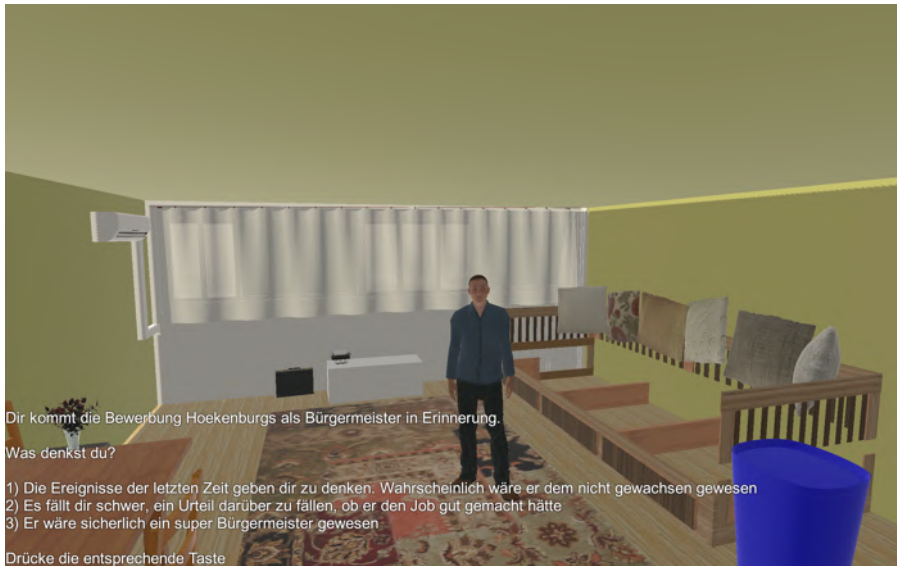

Dir kommt die Bewerbung Hoekenburgs als Bürgermeister in Erinnerung.

Was denkst du?

- 1) Die Ereignisse der letzten Zeit geben dir zu denken. Wahrscheinlich wäre er dem nicht gewachsen gewesen
- 2) Es fällt dir schwer, ein Urteil darüber zu fällen, ob er den Job gut gemacht hätte
- 3) Er wäre sicherlich ein super Bürgermeister gewesen

Drücke die entsprechende Taste

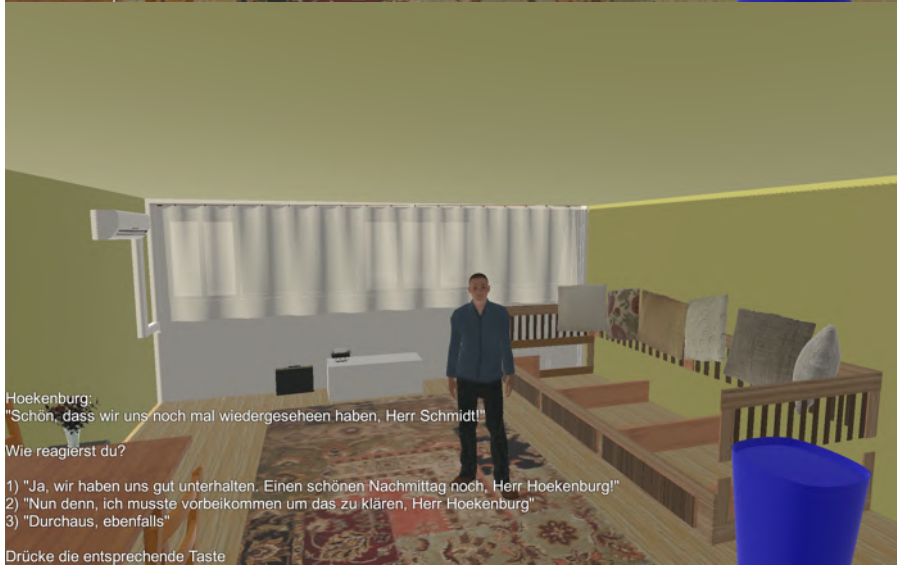

Hoekenburg:  
"Schön, dass wir uns noch mal wiedergesehen haben, Herr Schmidt!"

Wie reagierst du?

- 1) "Ja, wir haben uns gut unterhalten. Einen schönen Nachmittag noch, Herr Hoekenburg!"
- 2) "Nun denn, ich musste vorbeikommen um das zu klären, Herr Hoekenburg"
- 3) "Durchaus, ebenfalls"

Drücke die entsprechende Taste

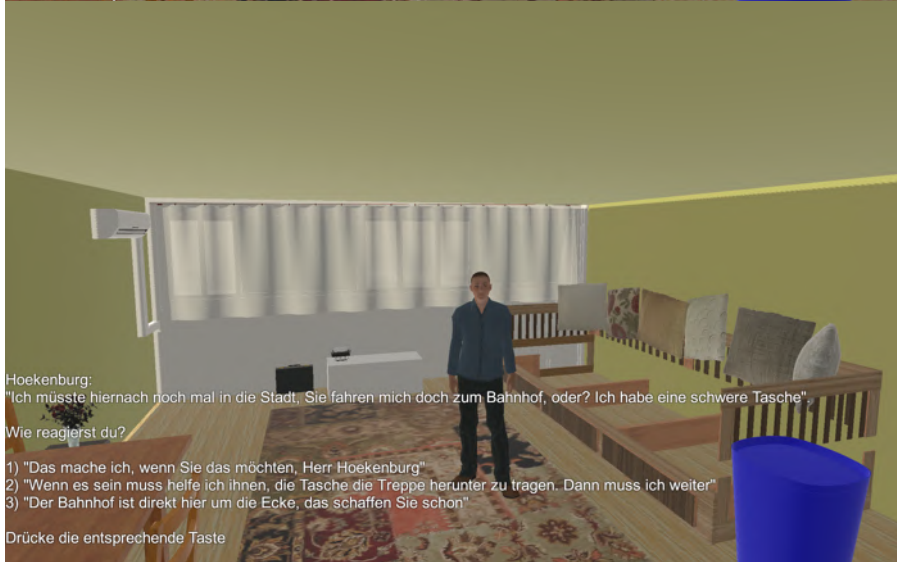

Hoekenburg:  
"Ich müsste hiernach noch mal in die Stadt, Sie fahren mich doch zum Bahnhof, oder? Ich habe eine schwere Tasche".

Wie reagierst du?

- 1) "Das mache ich, wenn Sie das möchten, Herr Hoekenburg"
- 2) "Wenn es sein muss helfe ich ihnen, die Tasche die Treppe herunter zu tragen. Dann muss ich weiter"
- 3) "Der Bahnhof ist direkt hier um die Ecke, das schaffen Sie schon"

Drücke die entsprechende Taste

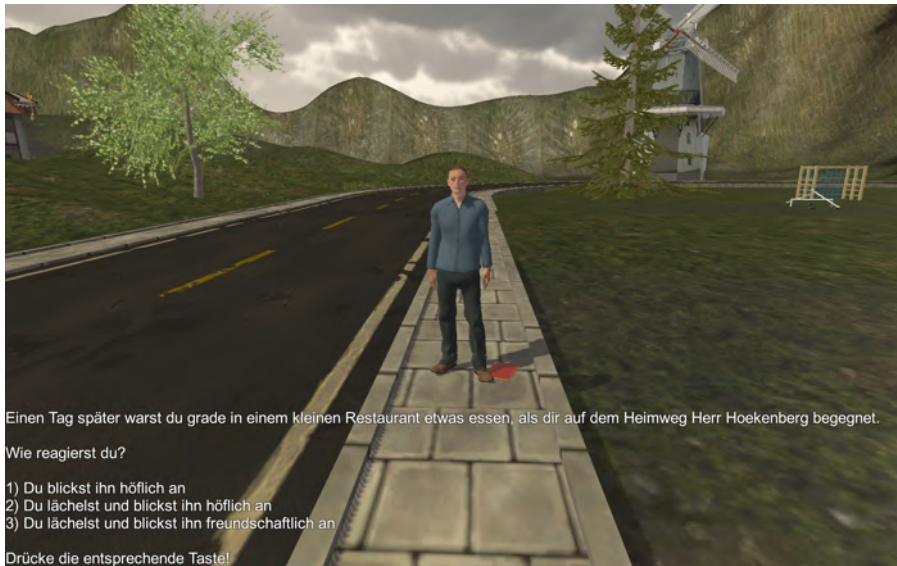

Einen Tag später warst du gerade in einem kleinen Restaurant etwas essen, als dir auf dem Heimweg Herr Hoekenberg begegnet.

Wie reagierst du?

- 1) Du blickst ihn höflich an
- 2) Du lächelst und blickst ihn höflich an
- 3) Du lächelst und blickst ihn freundschaftlich an

Drücke die entsprechende Taste!

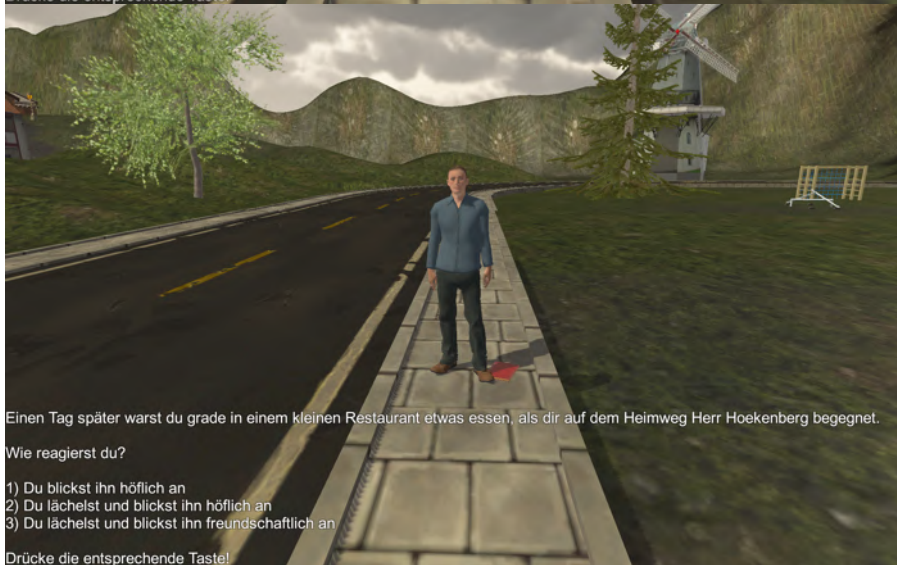

Einen Tag später warst du gerade in einem kleinen Restaurant etwas essen, als dir auf dem Heimweg Herr Hoekenberg begegnet.

Wie reagierst du?

- 1) Du blickst ihn höflich an
- 2) Du lächelst und blickst ihn höflich an
- 3) Du lächelst und blickst ihn freundschaftlich an

Drücke die entsprechende Taste!

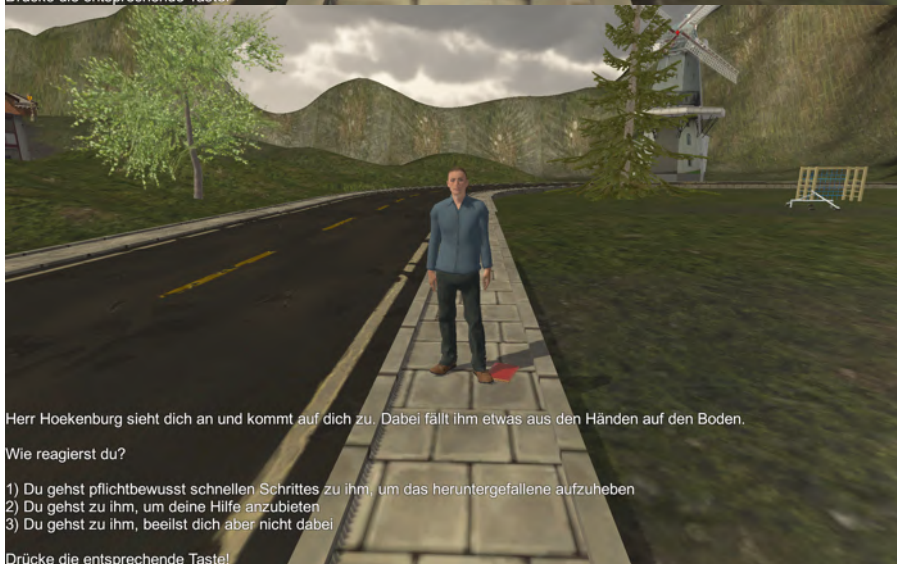

Herr Hoekenburg sieht dich an und kommt auf dich zu. Dabei fällt ihm etwas aus den Händen auf den Boden.

Wie reagierst du?

- 1) Du gehst pflichtbewusst schnellen Schrittes zu ihm, um das heruntergefallene aufzuheben
- 2) Du gehst zu ihm, um deine Hilfe anzubieten
- 3) Du gehst zu ihm, beeilst dich aber nicht dabei

Drücke die entsprechende Taste!

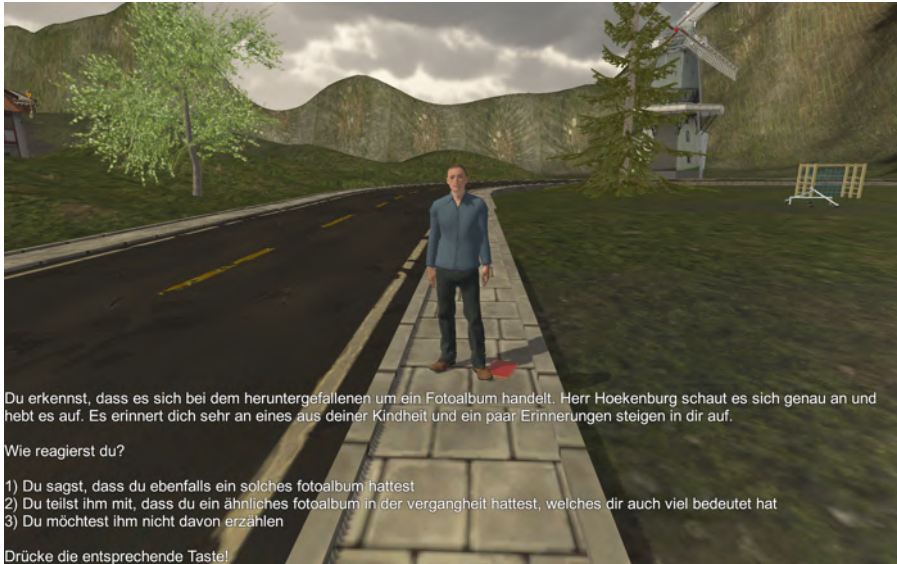

Du erkennst, dass es sich bei dem heruntergefallenen um ein Fotoalbum handelt. Herr Hoekenburg schaut es sich genau an und hebt es auf. Es erinnert dich sehr an eines aus deiner Kindheit und ein paar Erinnerungen steigen in dir auf.

Wie reagierst du?

- 1) Du sagst, dass du ebenfalls ein solches fotoalbum hattest
- 2) Du teilst ihm mit, dass du ein ähnliches fotoalbum in der vergangenheit hattest, welches dir auch viel bedeutet hat
- 3) Du möchtest ihm nicht davon erzählen

Drücke die entsprechende Taste!

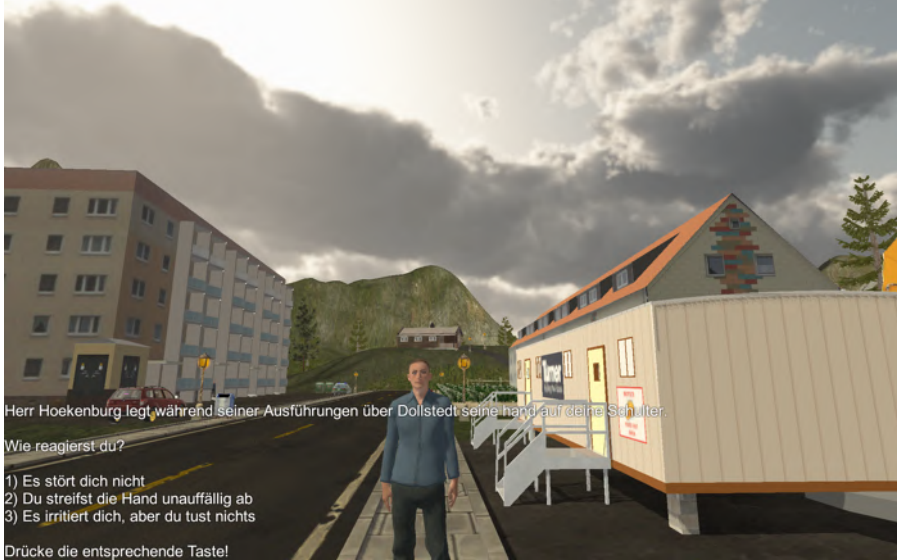

Herr Hoekenburg legt während seiner Ausführungen über Dollstedt seine hand auf deine Schulter.

Wie reagierst du?

- 1) Es stört dich nicht
- 2) Du streifst die Hand unauffällig ab
- 3) Es irritiert dich, aber du tust nichts

Drücke die entsprechende Taste!

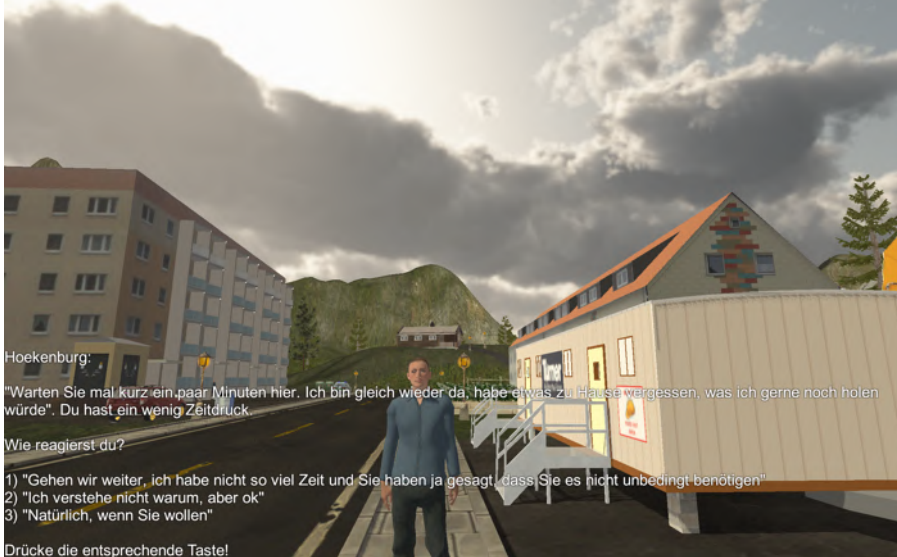

Hoekenburg:

"Warten Sie mal kurz ein paar Minuten hier. Ich bin gleich wieder da, habe etwas zuhause vergessen, was ich gerne noch holen würde". Du hast ein wenig Zeitdruck.

Wie reagierst du?

- 1) "Gehen wir weiter, ich habe nicht so viel Zeit und Sie haben ja gesagt, dass Sie es nicht unbedingt benötigen"
- 2) "Ich verstehe nicht warum, aber ok"
- 3) "Natürlich, wenn Sie wollen"

Drücke die entsprechende Taste!



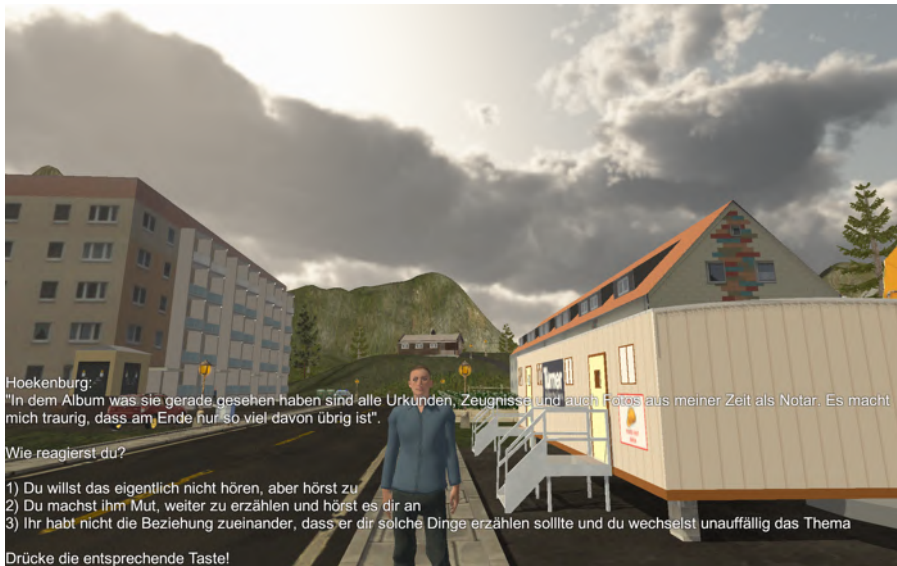

Hoekenburg:  
"In dem Album was sie gerade gesehen haben sind alle Urkunden, Zeugnisse und auch Fotos aus meiner Zeit als Notar. Es macht mich traurig, dass am Ende nur so viel davon übrig ist".

Wie reagierst du?

- 1) Du willst das eigentlich nicht hören, aber hörst zu
- 2) Du machst ihm Mut, weiter zu erzählen und hörst es dir an
- 3) Ihr habt nicht die Beziehung zueinander, dass er dir solche Dinge erzählen sollte und du wechselst unauffällig das Thema

Drücke die entsprechende Taste!

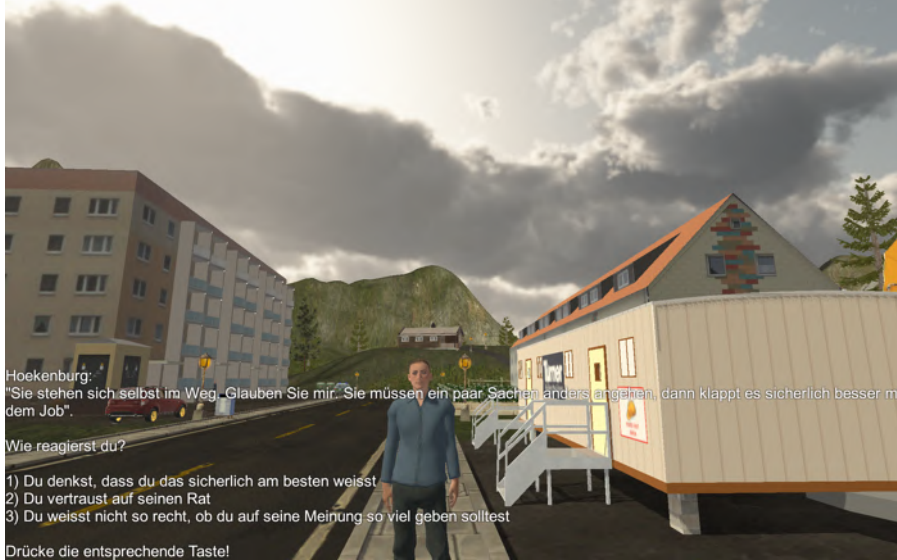

Hoekenburg:  
"Sie stehen sich selbst im Weg. Glauben Sie mir, Sie müssen ein paar Sachen anders angehen, dann klappt es sicherlich besser mit dem Job".

Wie reagierst du?

- 1) Du denkst, dass du das sicherlich am besten weisst
- 2) Du vertraust auf seinen Rat
- 3) Du weisst nicht so recht, ob du auf seine Meinung so viel geben solltest

Drücke die entsprechende Taste!

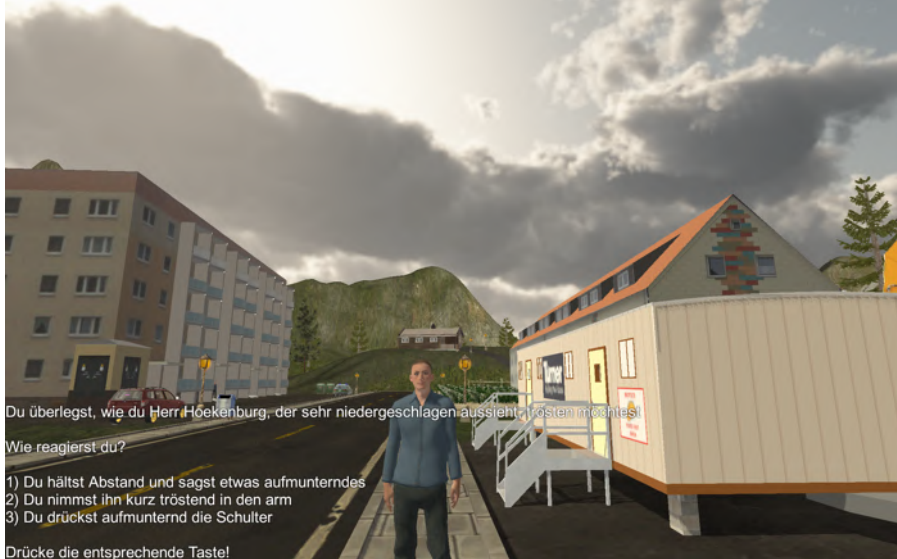

Du überlegst, wie du Herr Hoekenburg, der sehr niedergeschlagen aussieht, trösten möchtest.

Wie reagierst du?

- 1) Du hältst Abstand und sagst etwas aufmunterndes
- 2) Du nimmst ihn kurz tröstend in den arm
- 3) Du drückst aufmunternd die Schulter

Drücke die entsprechende Taste!

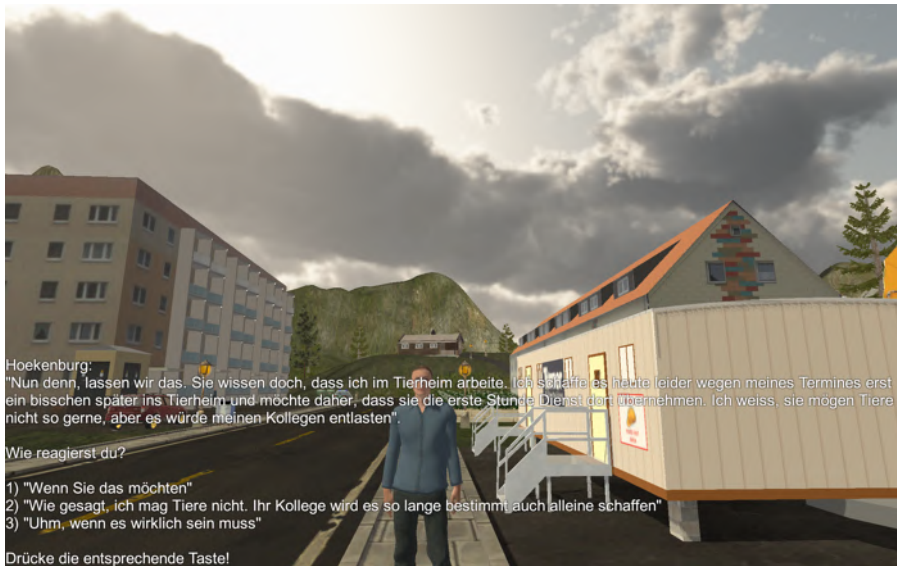

Hoekenburg:  
"Nun denn, lassen wir das. Sie wissen doch, dass ich im Tierheim arbeite. Ich schaffe es heute leider wegen meines Termins erst ein bisschen später ins Tierheim und möchte daher, dass sie die erste Stunde Dienst dort übernehmen. Ich weiss, sie mögen Tiere nicht so gerne, aber es würde meinen Kollegen entlasten".

Wie reagierst du?

- 1) "Wenn Sie das möchten"
- 2) "Wie gesagt, ich mag Tiere nicht. Ihr Kollege wird es so lange bestimmt auch alleine schaffen"
- 3) "Uhm, wenn es wirklich sein muss"

Drücke die entsprechende Taste!

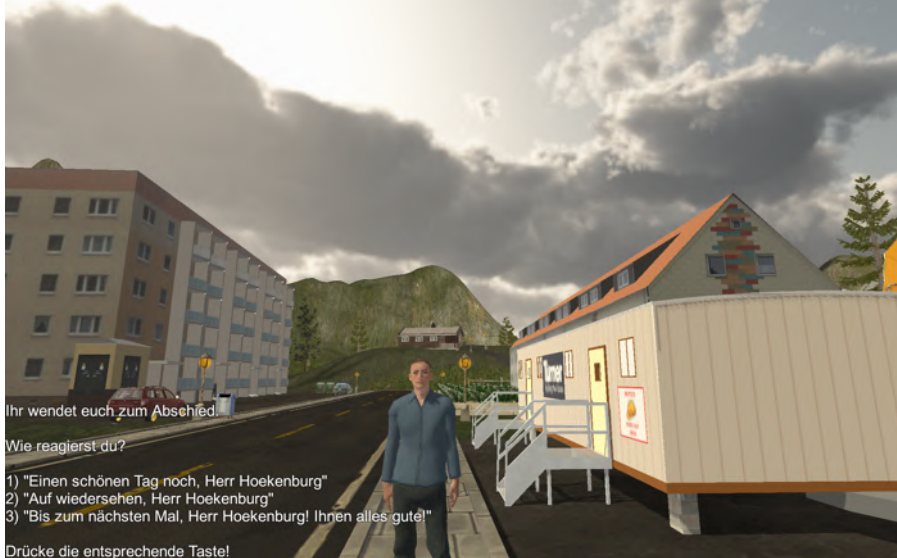

Ihr wendet euch zum Abschied.

Wie reagierst du?

- 1) "Einen schönen Tag noch, Herr Hoekenburg"
- 2) "Auf wiedersehen, Herr Hoekenburg"
- 3) "Bis zum nächsten Mal, Herr Hoekenburg! Ihnen alles gut!"

Drücke die entsprechende Taste!

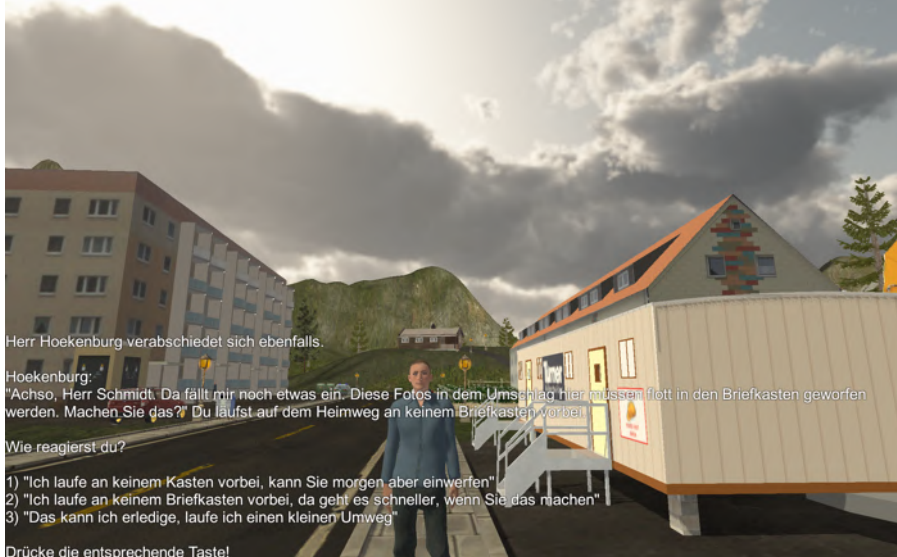

Herr Hoekenburg verabschiedet sich ebenfalls.

Hoekenburg:  
"Achso, Herr Schmidt. Da fällt mir noch etwas ein. Diese Fotos in dem Umschlag hier müssen flott in den Briefkasten geworfen werden. Machen Sie das? Du läufst auf dem Heimweg an keinem Briefkasten vorbei".

Wie reagierst du?

- 1) "Ich laufe an keinem Kasten vorbei, kann Sie morgen aber einwerfen"
- 2) "Ich laufe an keinem Briefkasten vorbei, da geht es schneller, wenn Sie das machen"
- 3) "Das kann ich erledige, laufe ich einen kleinen Umweg"

Drücke die entsprechende Taste!

### S5.2.3 Berger (Low-Power/High-Affiliation, Updating-Avatar)

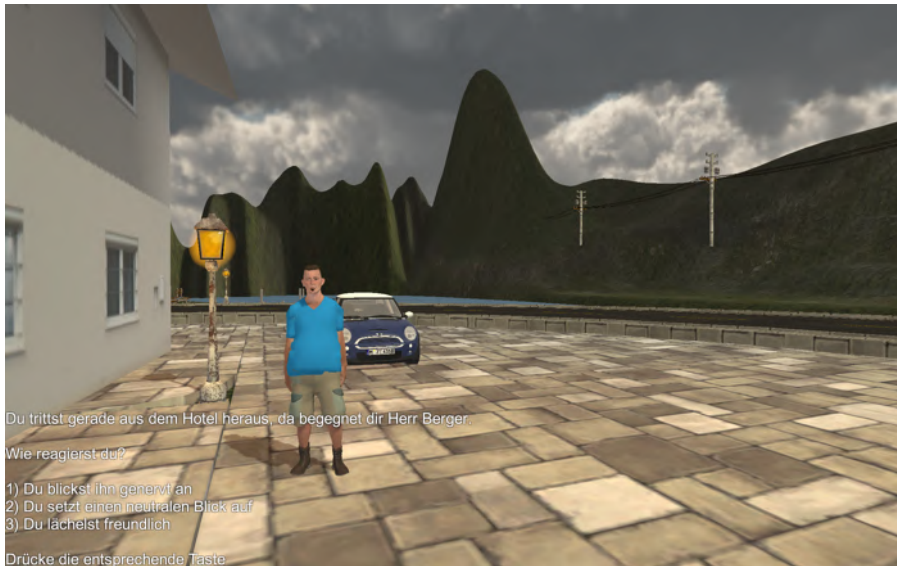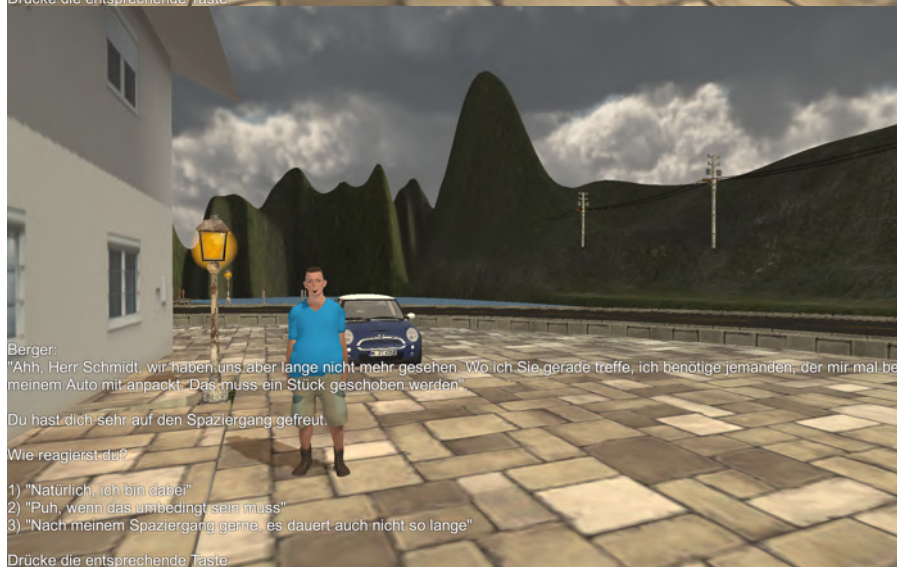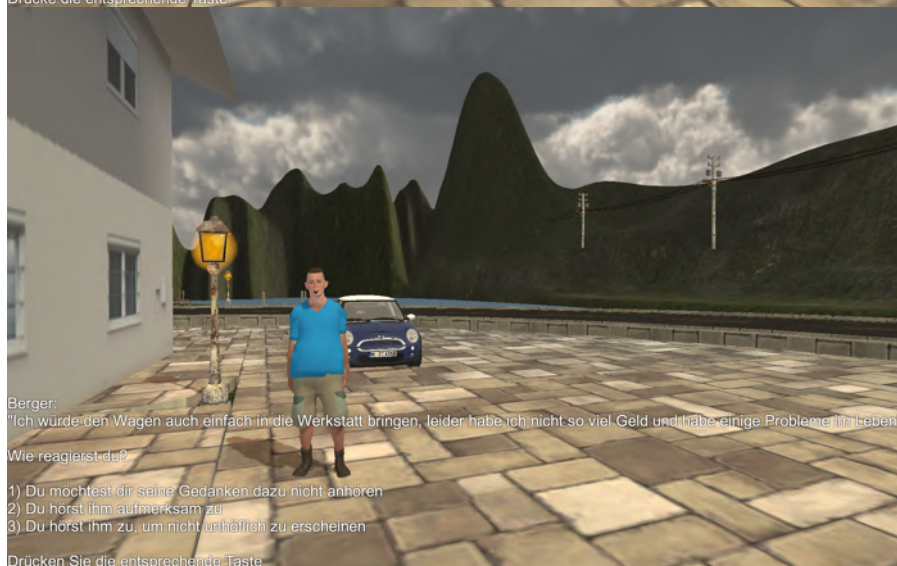

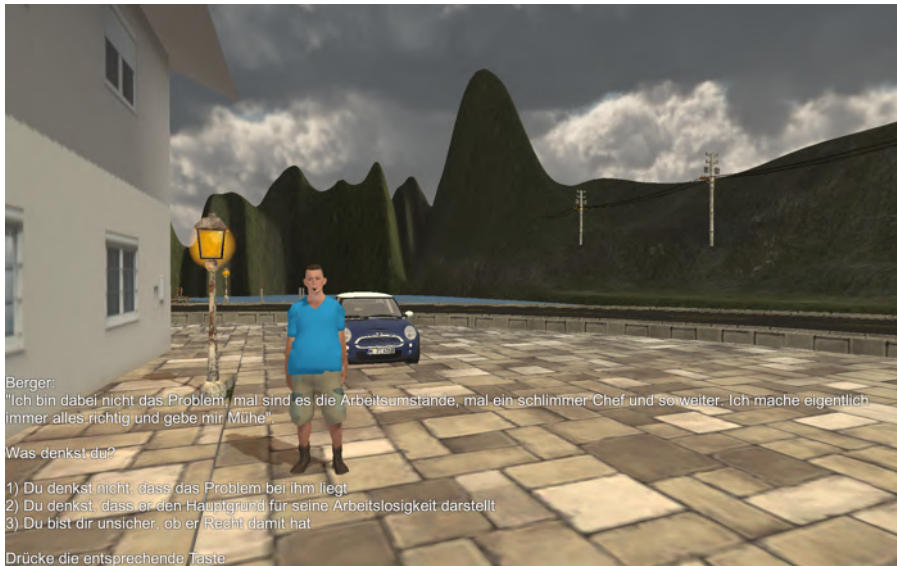

Berger:  
"Ich bin dabei nicht das Problem, mal sind es die Arbeitsumstände, mal ein schlimmer Chef und so weiter. Ich mache eigentlich immer alles richtig und gebe mir Mühe"

Was denkst du?

- 1) Du denkst nicht, dass das Problem bei ihm liegt
- 2) Du denkst, dass er den Hauptgrund für seine Arbeitslosigkeit darstellt
- 3) Du bist dir unsicher, ob er Recht damit hat

Drücke die entsprechende Taste

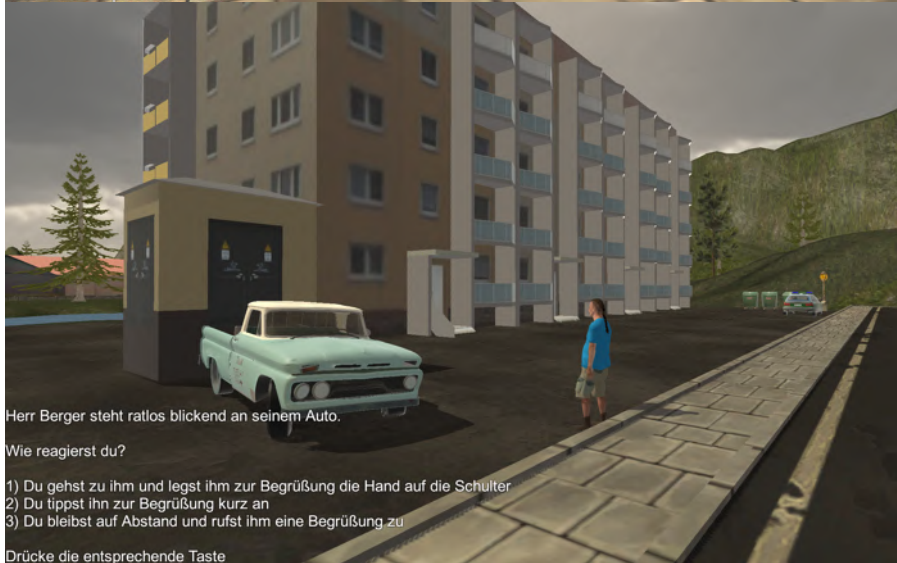

Herr Berger steht ratlos blickend an seinem Auto.

Wie reagierst du?

- 1) Du gehst zu ihm und legst ihm zur Begrüßung die Hand auf die Schulter
- 2) Du tippst ihn zur Begrüßung kurz an
- 3) Du bleibst auf Abstand und rufst ihm eine Begrüßung zu

Drücke die entsprechende Taste

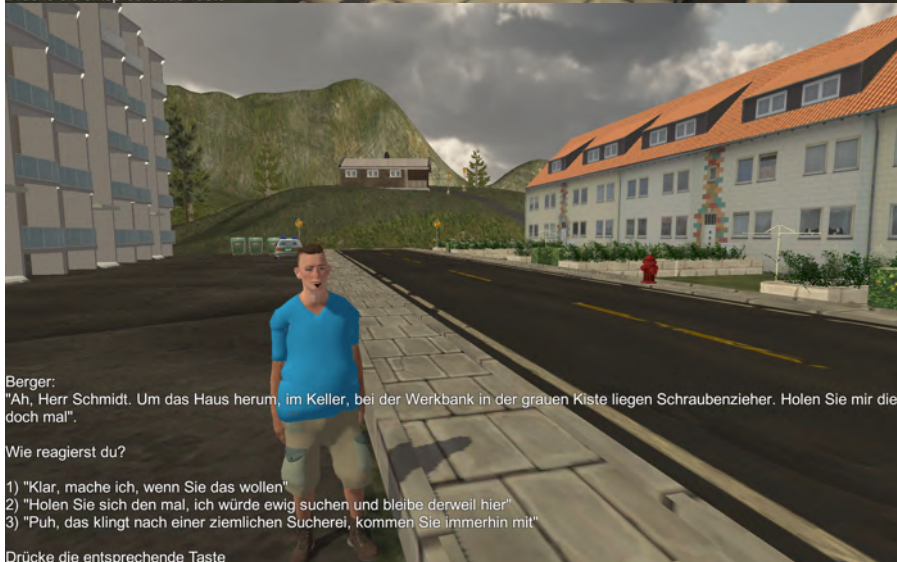

Berger:  
"Ah, Herr Schmidt. Um das Haus herum, im Keller, bei der Werkbank in der grauen Kiste liegen Schraubenzieher. Holen Sie mir die doch mal".

Wie reagierst du?

- 1) "Klar, mache ich, wenn Sie das wollen"
- 2) "Holen Sie sich den mal, ich würde ewig suchen und bleibe derweil hier"
- 3) "Puh, das klingt nach einer ziemlich Sucherei, kommen Sie immerhin mit"

Drücke die entsprechende Taste

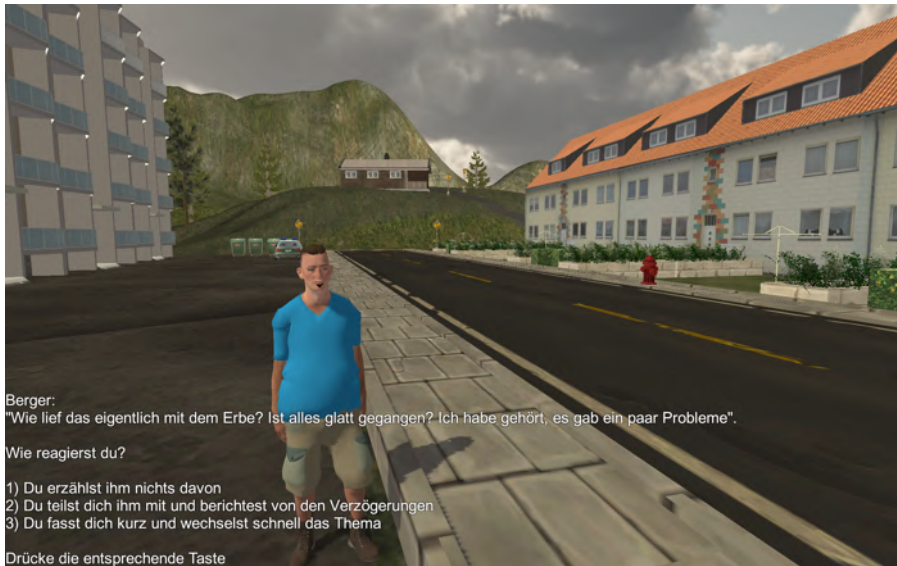

Berger:  
"Wie lief das eigentlich mit dem Erbe? Ist alles glatt gegangen? Ich habe gehört, es gab ein paar Probleme".

Wie reagierst du?

- 1) Du erzählst ihm nichts davon
- 2) Du teilst dich ihm mit und berichtest von den Verzögerungen
- 3) Du fasst dich kurz und wechselst schnell das Thema

Drücke die entsprechende Taste

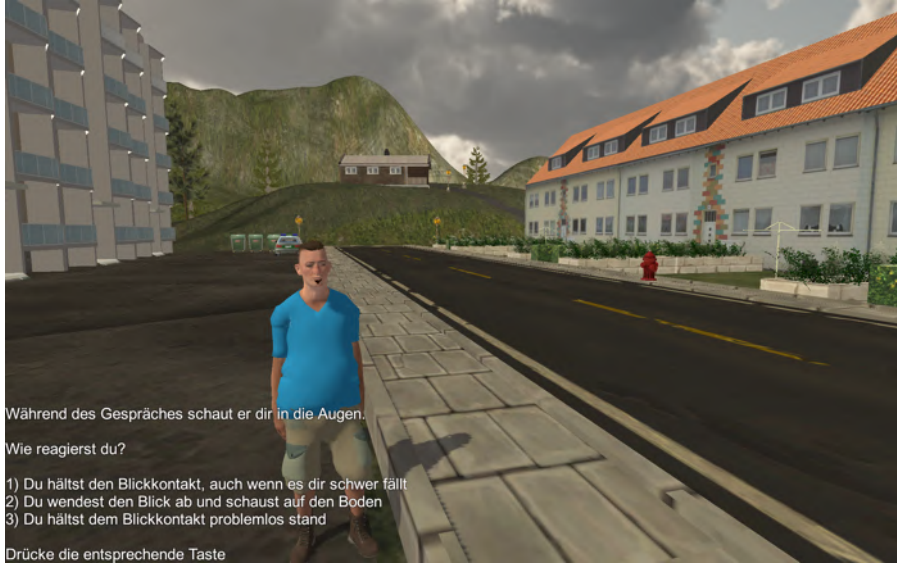

Während des Gesprächs schaut er dir in die Augen.

Wie reagierst du?

- 1) Du hältst den Blickkontakt, auch wenn es dir schwer fällt
- 2) Du wendest den Blick ab und schaust auf den Boden
- 3) Du hältst dem Blickkontakt problemlos stand

Drücke die entsprechende Taste

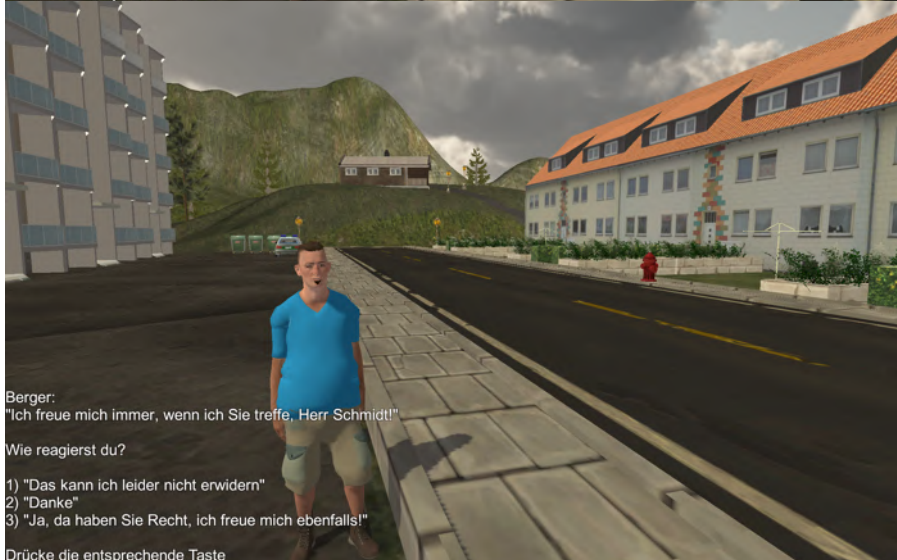

Berger:  
"Ich freue mich immer, wenn ich Sie treffe, Herr Schmidt!"

Wie reagierst du?

- 1) "Das kann ich leider nicht erwidern"
- 2) "Danke"
- 3) "Ja, da haben Sie Recht, ich freue mich ebenfalls!"

Drücke die entsprechende Taste

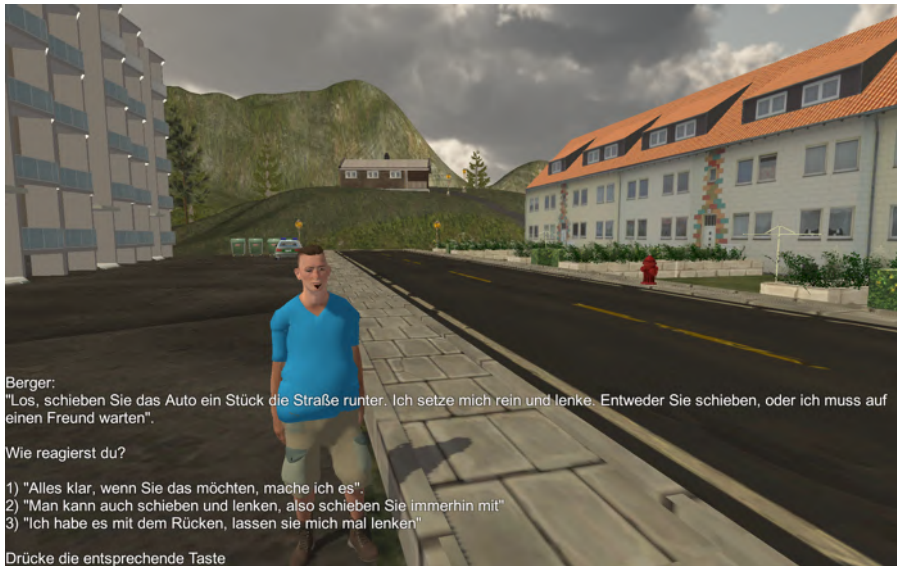

Berger:  
"Los, schieben Sie das Auto ein Stück die Straße runter. Ich setze mich rein und lenke. Entweder Sie schieben, oder ich muss auf einen Freund warten".

Wie reagierst du?

- 1) "Alles klar, wenn Sie das möchten, mache ich es".
- 2) "Man kann auch schieben und lenken, also schieben Sie immerhin mit"
- 3) "Ich habe es mit dem Rücken, lassen sie mich mal lenken"

Drücke die entsprechende Taste

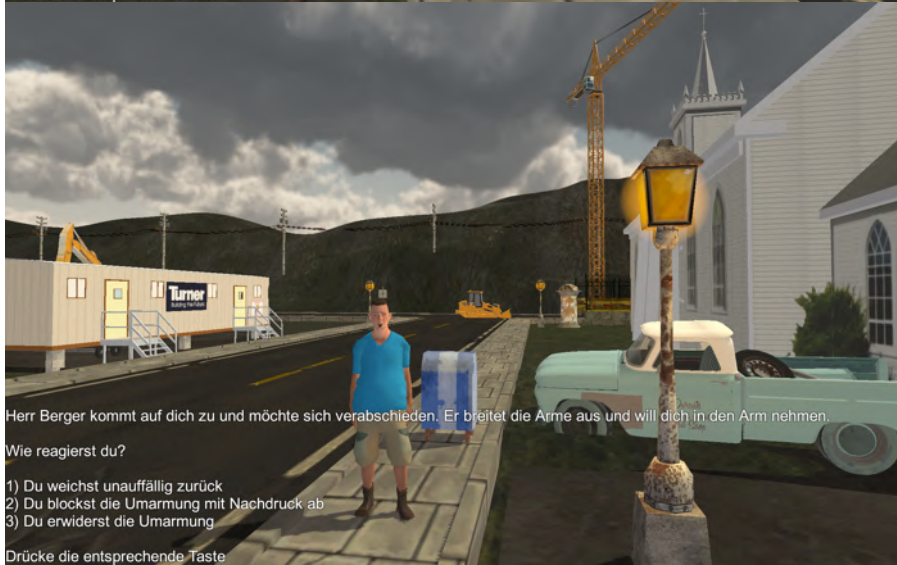

Herr Berger kommt auf dich zu und möchte sich verabschieden. Er breitet die Arme aus und will dich in den Arm nehmen.

Wie reagierst du?

- 1) Du weichst unauffällig zurück
- 2) Du blockst die Umarmung mit Nachdruck ab
- 3) Du erwidert die Umarmung

Drücke die entsprechende Taste

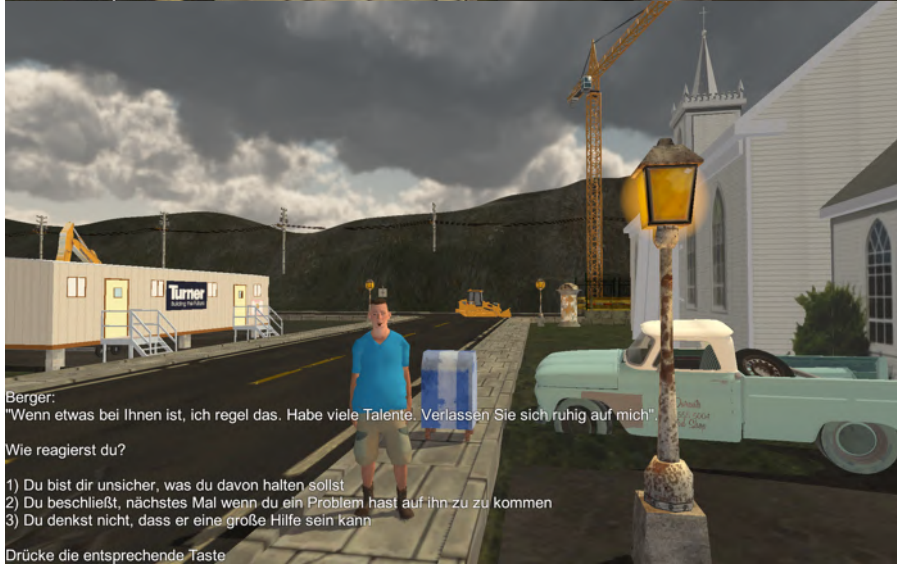

Berger:  
"Wenn etwas bei Ihnen ist, ich regel das. Habe viele Talente. Verlassen Sie sich ruhig auf mich"

Wie reagierst du?

- 1) Du bist dir unsicher, was du davon halten sollst
- 2) Du beschließt, nächstes Mal wenn du ein Problem hast auf ihn zu zu kommen
- 3) Du denkst nicht, dass er eine große Hilfe sein kann

Drücke die entsprechende Taste

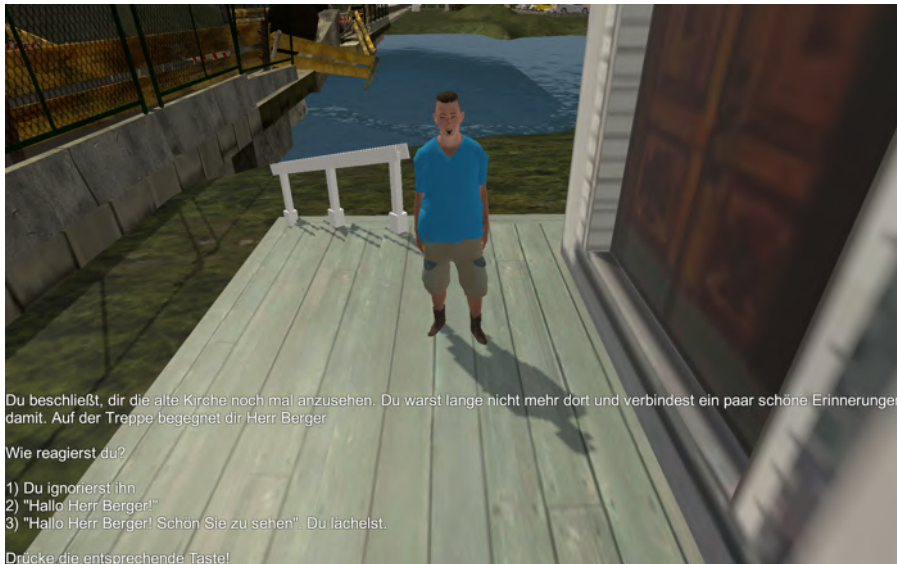

Du beschließt, dir die alte Kirche noch mal anzusehen. Du warst lange nicht mehr dort und verbindest ein paar schöne Erinnerungen damit. Auf der Treppe begegnet dir Herr Berger

Wie reagierst du?

- 1) Du ignorierst ihn
- 2) "Hallo Herr Berger!"
- 3) "Hallo Herr Berger! Schön Sie zu sehen". Du lächelst.

Drücke die entsprechende Taste!

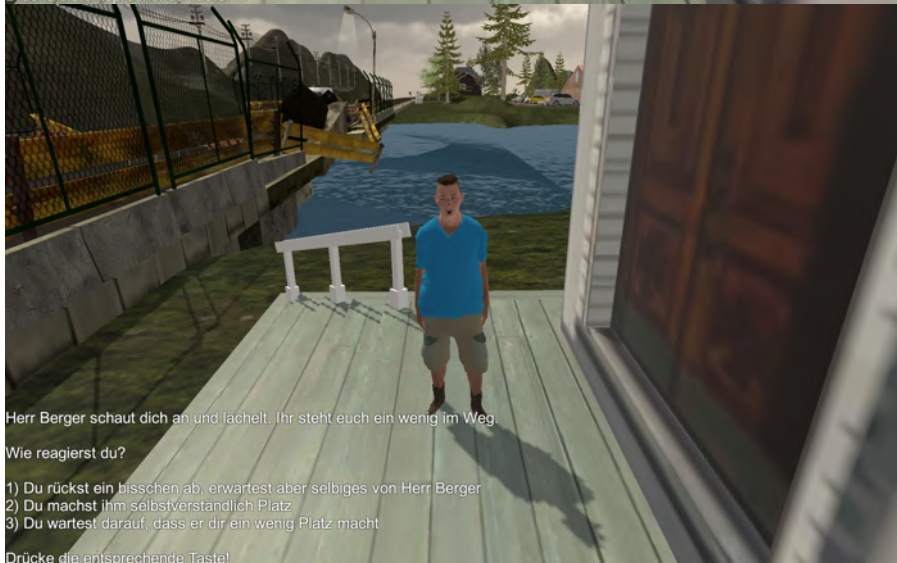

Herr Berger schaut dich an und lächelt. Ihr steht euch ein wenig im Weg.

Wie reagierst du?

- 1) Du rückst ein bisschen ab, erwartest aber selbiges von Herr Berger
- 2) Du machst ihm selbstverständlich Platz
- 3) Du wartest darauf, dass er dir ein wenig Platz macht

Drücke die entsprechende Taste!

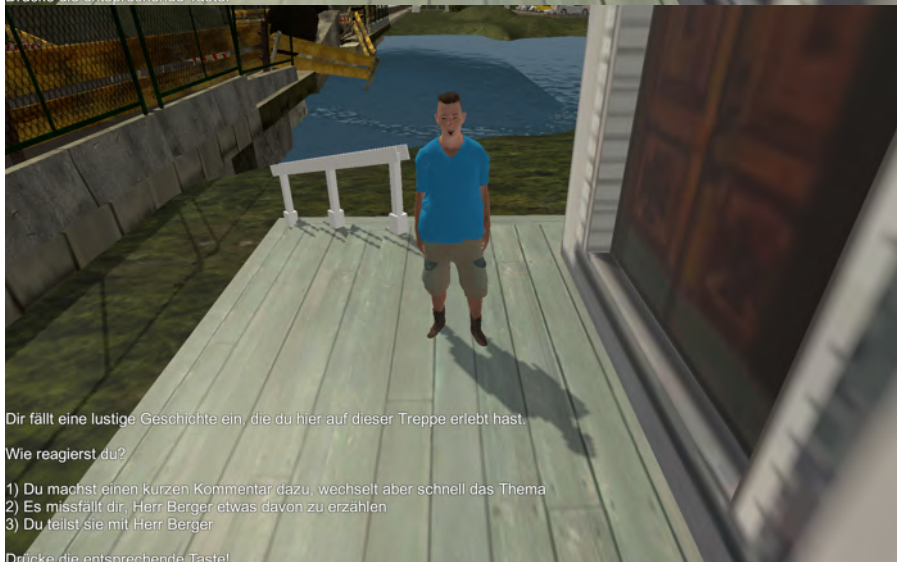

Dir fällt eine lustige Geschichte ein, die du hier auf dieser Treppe erlebt hast.

Wie reagierst du?

- 1) Du machst einen kurzen Kommentar dazu, wechselt aber schnell das Thema
- 2) Es missfällt dir, Herr Berger etwas davon zu erzählen
- 3) Du teilst sie mit Herr Berger

Drücke die entsprechende Taste!

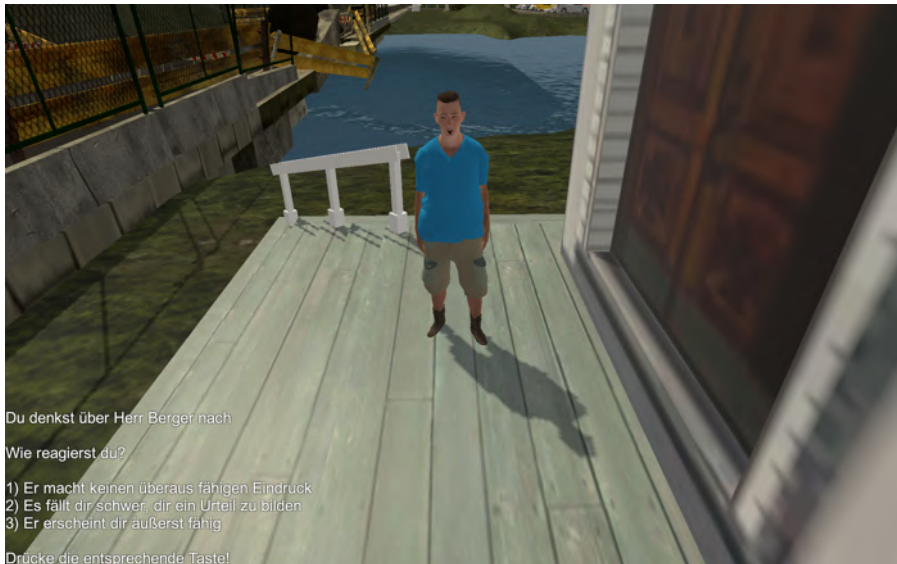

Du denkst über Herr Berger nach

Wie reagierst du?

- 1) Er macht keinen überaus fähigen Eindruck
- 2) Es fällt dir schwer, dir ein Urteil zu bilden
- 3) Er erscheint dir äußerst fähig

Drücke die entsprechende Taste!

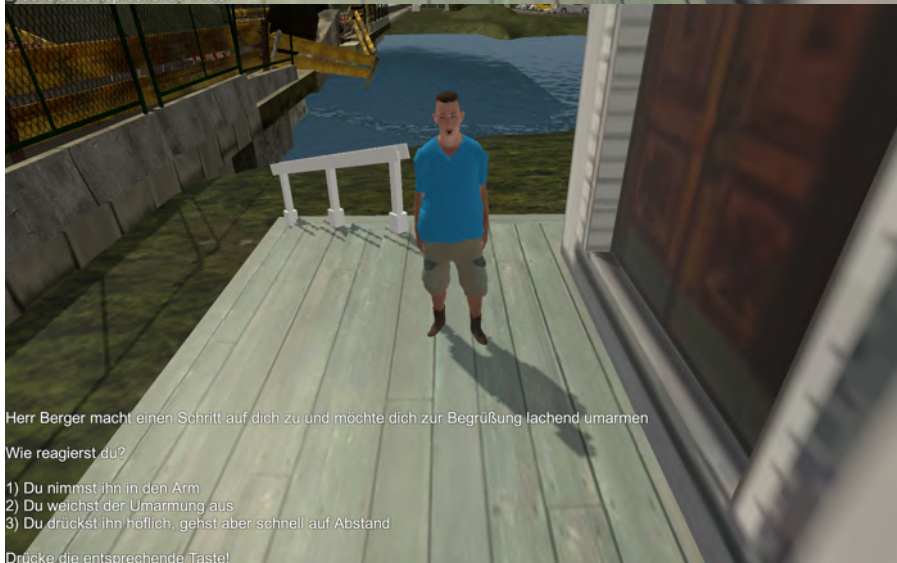

Herr Berger macht einen Schritt auf dich zu und möchte dich zur Begrüßung lachend umarmen

Wie reagierst du?

- 1) Du nimmst ihn in den Arm
- 2) Du weichst der Umarmung aus
- 3) Du drückst ihn höflich, gehst aber schnell auf Abstand

Drücke die entsprechende Taste!

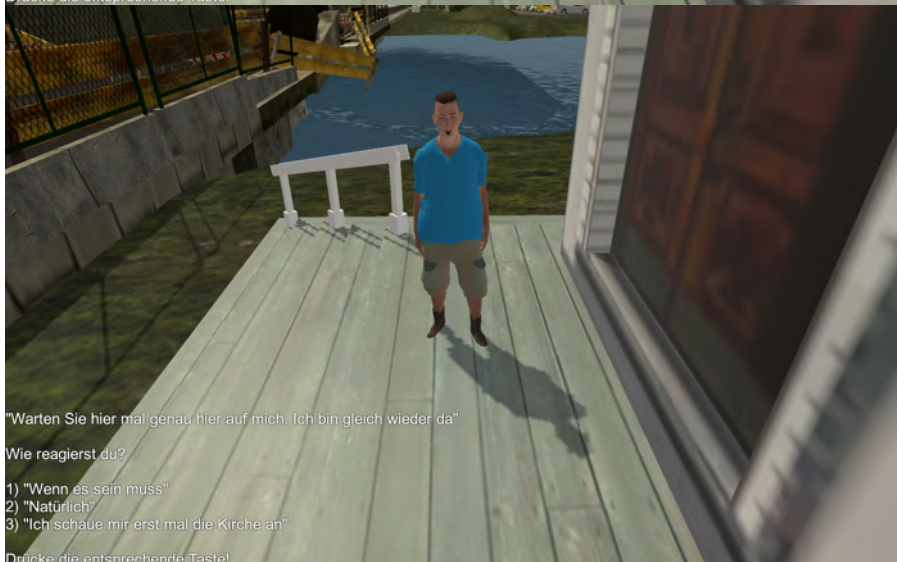

"Warten Sie hier mal genau hier auf mich. Ich bin gleich wieder da"

Wie reagierst du?

- 1) "Wenn es sein muss"
- 2) "Natürlich"
- 3) "Ich schaue mir erst mal die Kirche an"

Drücke die entsprechende Taste!



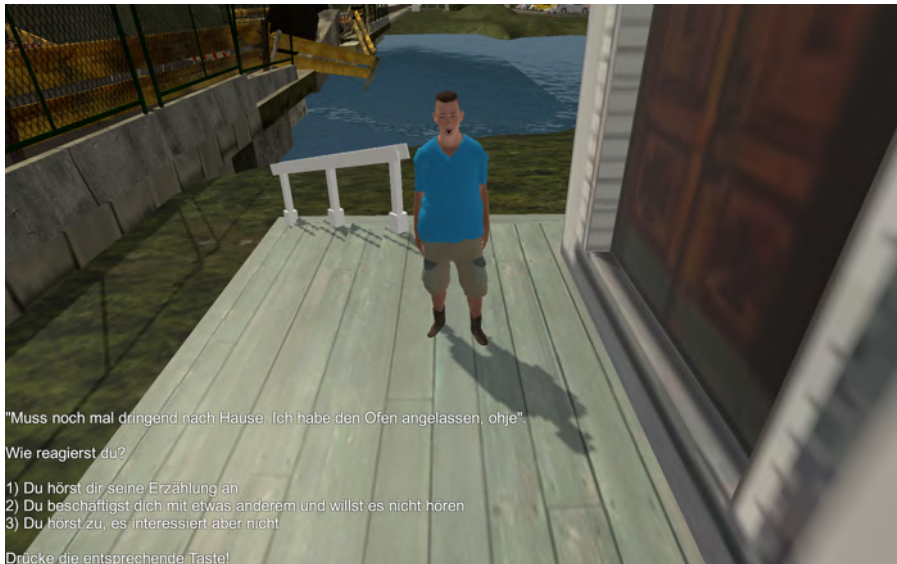

"Muss noch mal dringend nach Hause. Ich habe den Ofen angelassen, ohje".

Wie reagierst du?

- 1) Du hörst dir seine Erzählung an
- 2) Du beschäftigst dich mit etwas anderem und willst es nicht hören
- 3) Du hörst zu, es interessiert aber nicht

Drücke die entsprechende Taste!

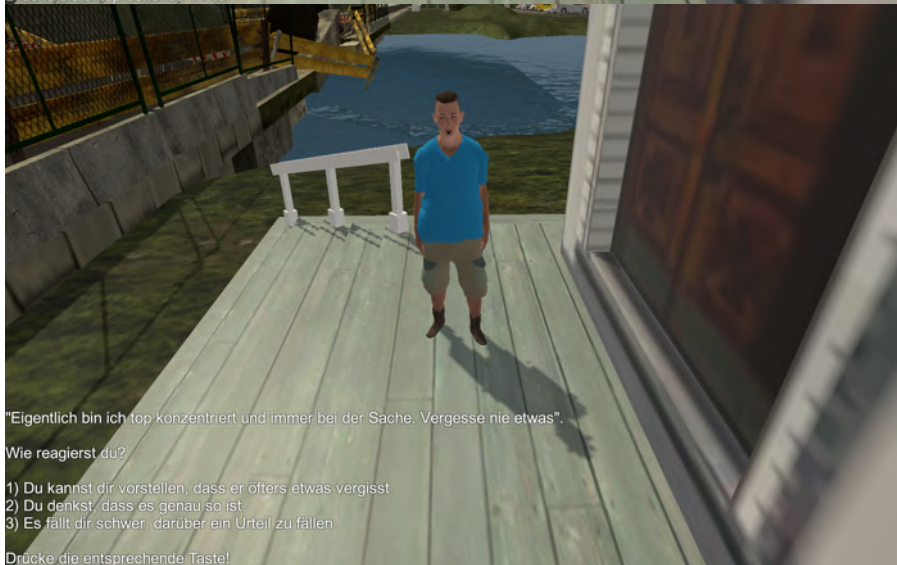

"Eigentlich bin ich top konzentriert und immer bei der Sache. Vergesse nie etwas".

Wie reagierst du?

- 1) Du kannst dir vorstellen, dass er öfters etwas vergisst
- 2) Du denkst, dass es genau so ist
- 3) Es fällt dir schwer, darüber ein Urteil zu fällen

Drücke die entsprechende Taste!

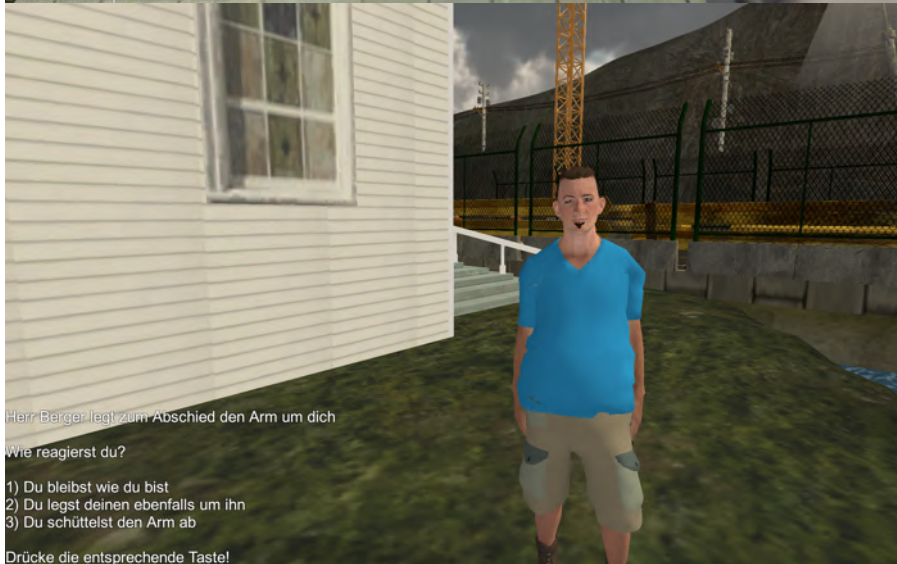

Herr Berger legt zum Abschied den Arm um dich

Wie reagierst du?

- 1) Du bleibst wie du bist
- 2) Du legst deinen ebenfalls um ihn
- 3) Du schüttelst den Arm ab

Drücke die entsprechende Taste!

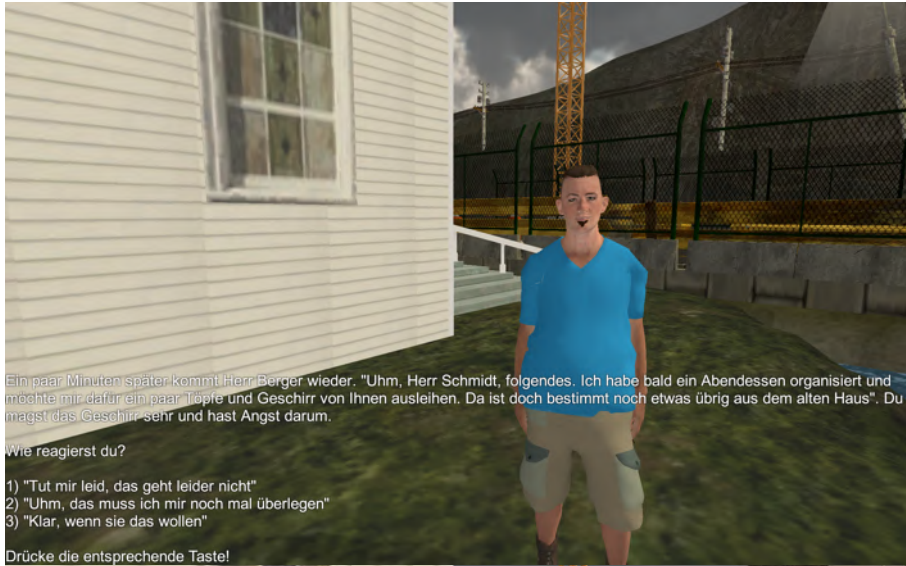

Ein paar Minuten später kommt Herr Berger wieder. "Uhm, Herr Schmidt, folgendes. Ich habe bald ein Abendessen organisiert und möchte mir dafür ein paar Töpfe und Geschirr von Ihnen ausleihen. Da ist doch bestimmt noch etwas übrig aus dem alten Haus". Du magst das Geschirr sehr und hast Angst darum.

Wie reagierst du?

- 1) "Tut mir leid, das geht leider nicht"
- 2) "Uhm, das muss ich mir noch mal überlegen"
- 3) "Klar, wenn sie das wollen"

Drücke die entsprechende Taste!

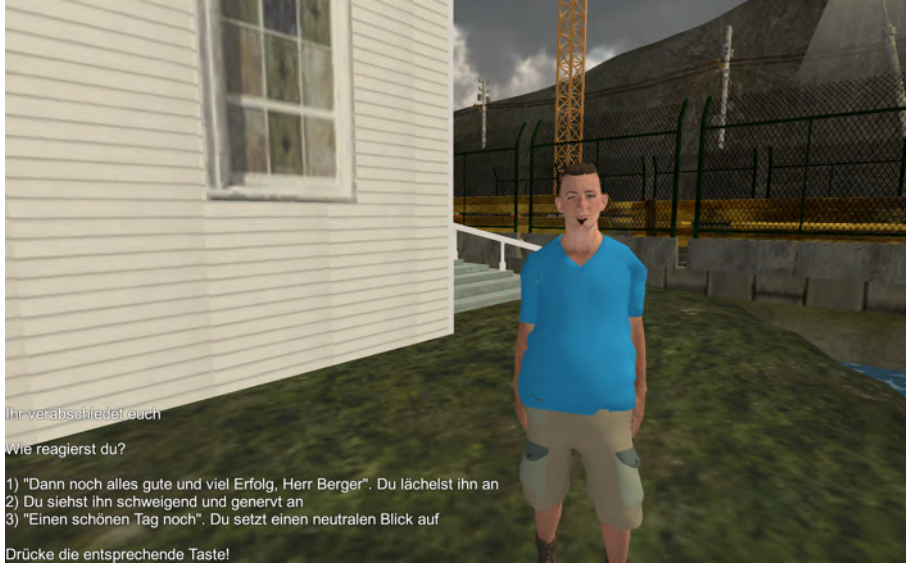

Ihr verabschiedet euch

Wie reagierst du?

- 1) "Dann noch alles gute und viel Erfolg, Herr Berger". Du lächelst ihn an
- 2) Du siehst ihn schweigend und genervt an
- 3) "Einen schönen Tag noch". Du setzt einen neutralen Blick auf

Drücke die entsprechende Taste!

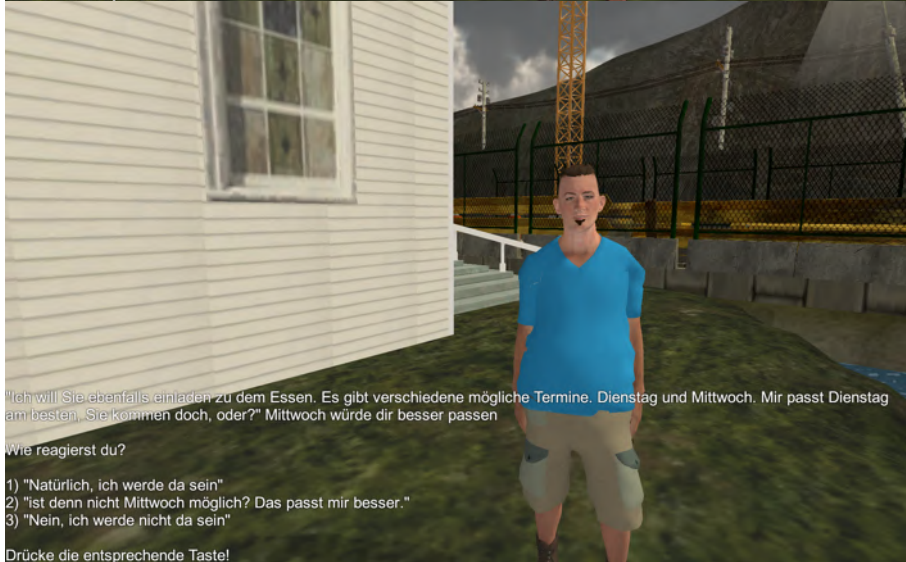

"Ich will Sie ebenfalls einladen zu dem Essen. Es gibt verschiedene mögliche Termine. Dienstag und Mittwoch. Mir passt Dienstag am besten, Sie kommen doch, oder?" Mittwoch würde dir besser passen

Wie reagierst du?

- 1) "Natürlich, ich werde da sein"
- 2) "Ist denn nicht Mittwoch möglich? Das passt mir besser."
- 3) "Nein, ich werde nicht da sein"

Drücke die entsprechende Taste!

## S5.2.4 Karoske (Low-Power/High-Affiliation, Remapping-Avatar)

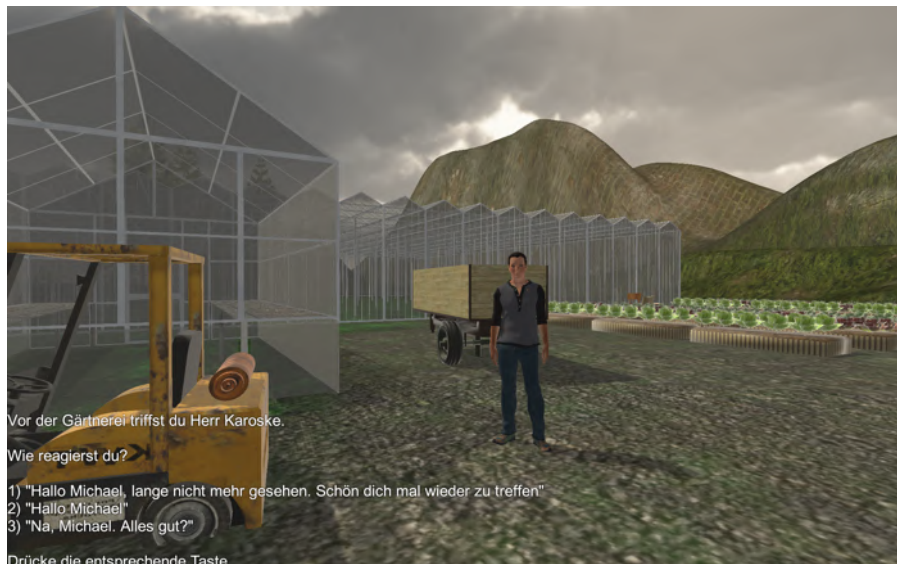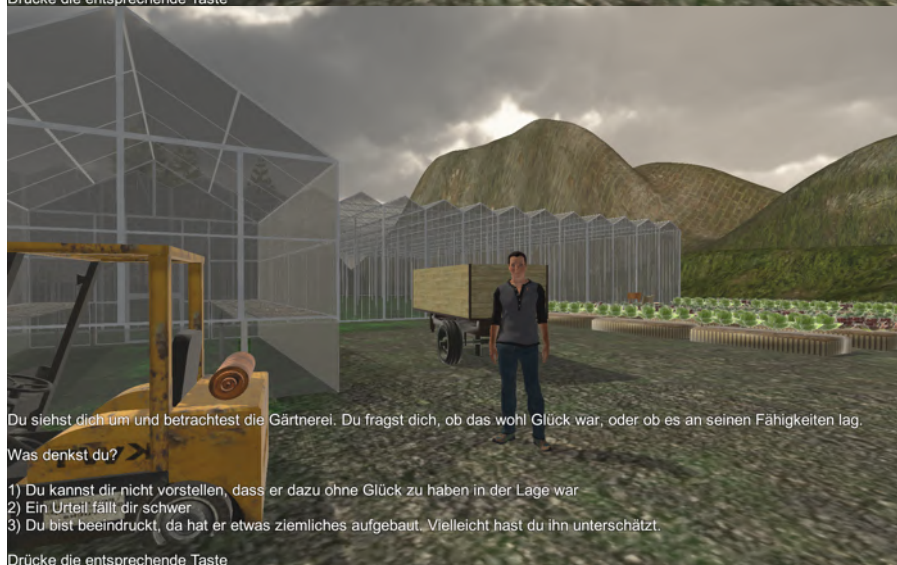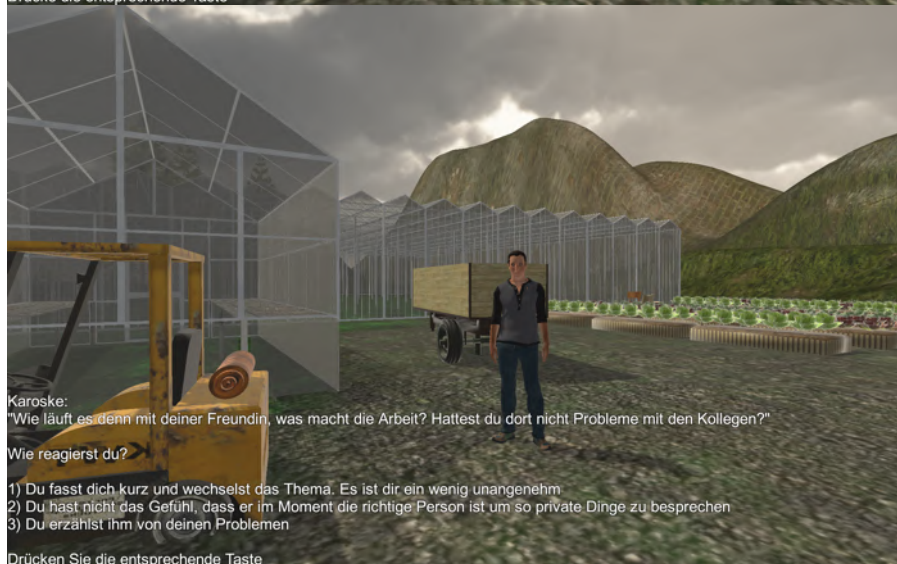

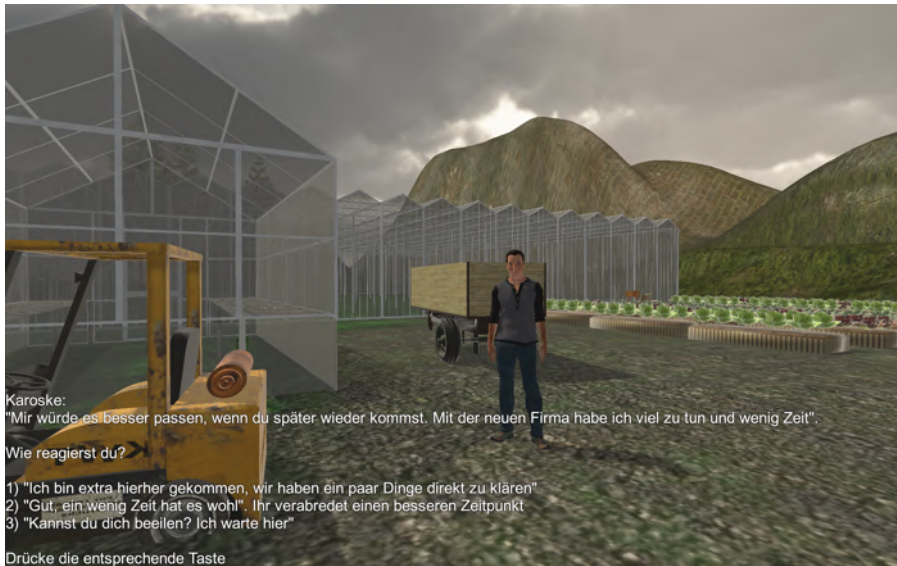

Karoske:  
"Mir würde es besser passen, wenn du später wieder kommst. Mit der neuen Firma habe ich viel zu tun und wenig Zeit".

Wie reagierst du?

- 1) "Ich bin extra hierher gekommen, wir haben ein paar Dinge direkt zu klären"
- 2) "Gut, ein wenig Zeit hat es wohl". Ihr verabredet einen besseren Zeitpunkt
- 3) "Kannst du dich beeilen? Ich warte hier"

Drücke die entsprechende Taste

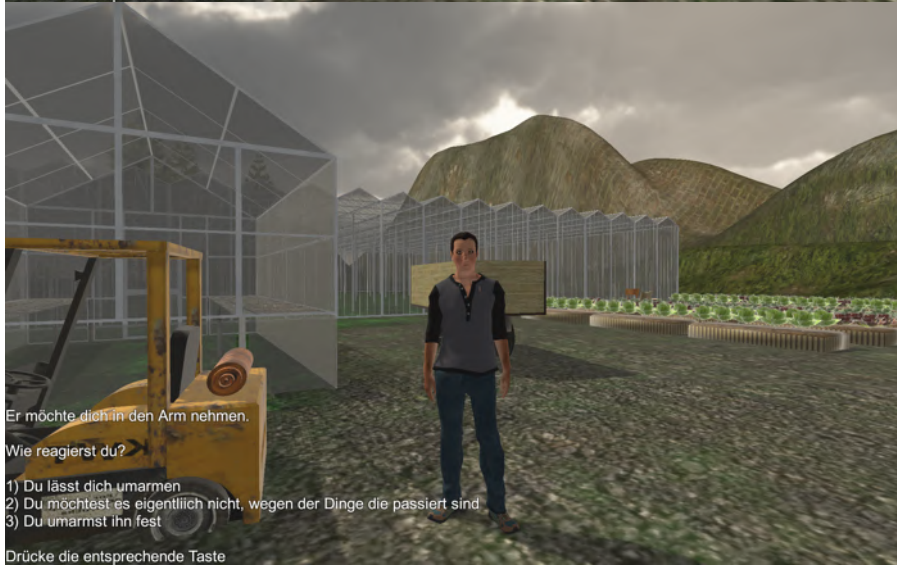

Er möchte dich in den Arm nehmen.

Wie reagierst du?

- 1) Du lässt dich umarmen
- 2) Du möchtest es eigentlich nicht, wegen der Dinge die passiert sind
- 3) Du umarmst ihn fest

Drücke die entsprechende Taste

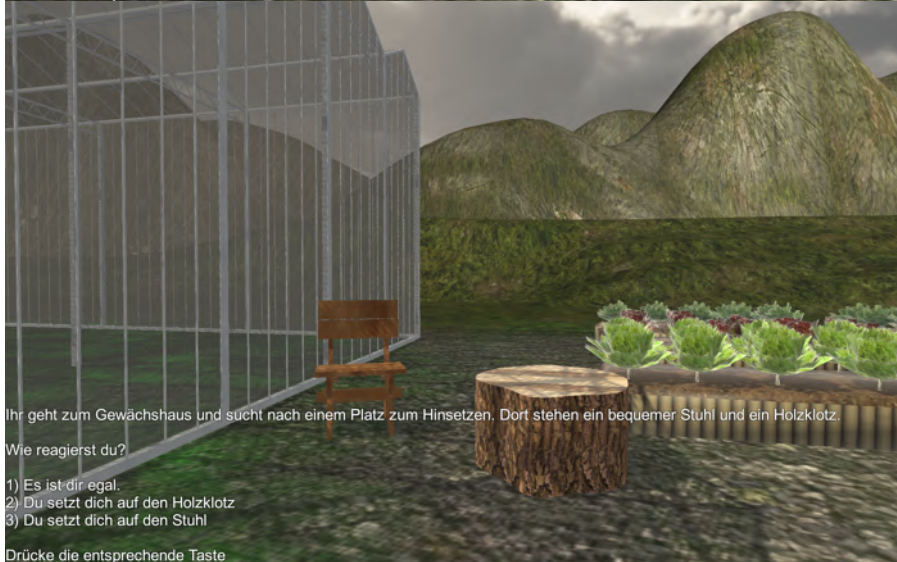

Ihr geht zum Gewächshaus und sucht nach einem Platz zum Hinsetzen. Dort stehen ein bequemer Stuhl und ein Holzklötz.

Wie reagierst du?

- 1) Es ist dir egal.
- 2) Du setzt dich auf den Holzklötz
- 3) Du setzt dich auf den Stuhl

Drücke die entsprechende Taste

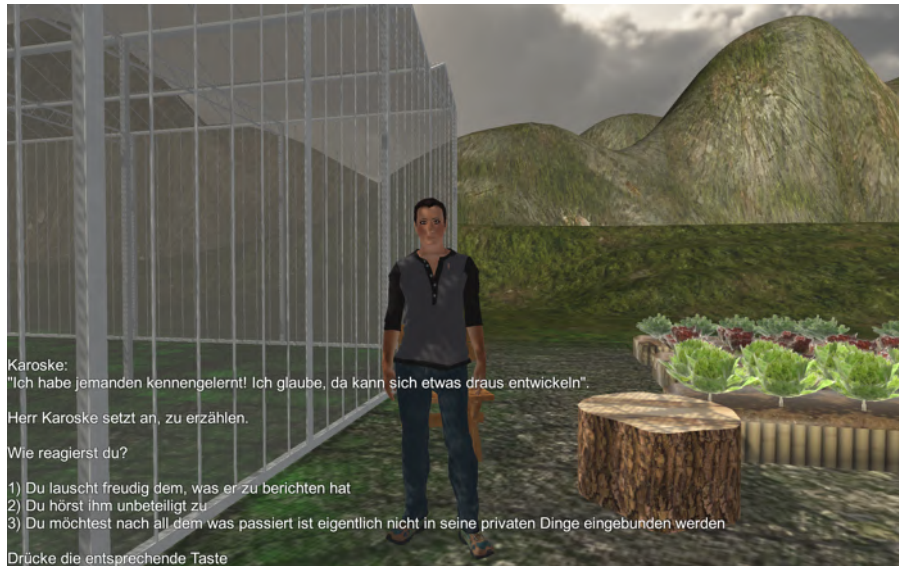

Karoske:  
"Ich habe jemanden kennengelernt! Ich glaube, da kann sich etwas draus entwickeln".

Herr Karoske setzt an, zu erzählen.

Wie reagierst du?

- 1) Du lauscht freudig dem, was er zu berichten hat
- 2) Du hörst ihm unbeteiligt zu
- 3) Du möchtest nach all dem was passiert ist eigentlich nicht in seine privaten Dinge eingebunden werden

Drücke die entsprechende Taste

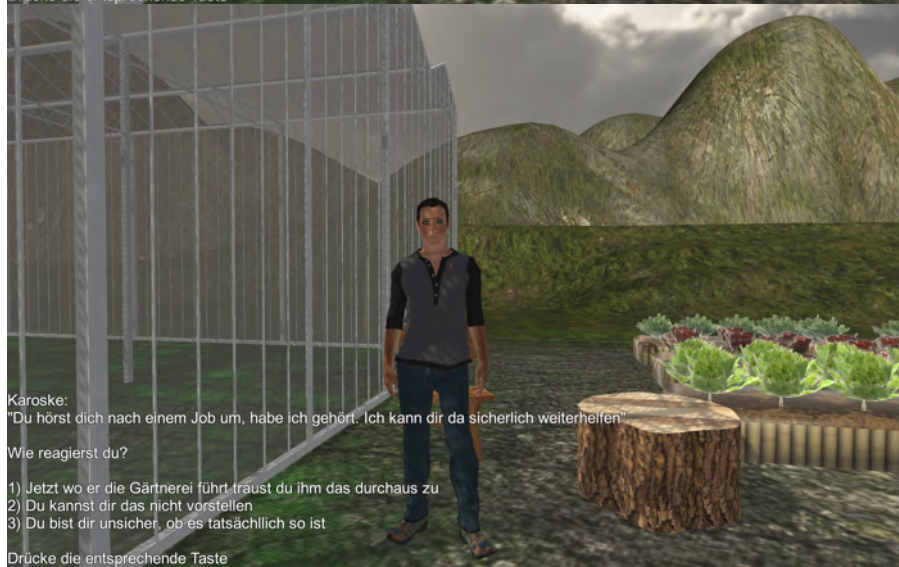

Karoske:  
"Du hörst dich nach einem Job um, habe ich gehört. Ich kann dir da sicherlich weiterhelfen"

Wie reagierst du?

- 1) Jetzt wo er die Gärtnerei führt träust du ihm das durchaus zu
- 2) Du kannst dir das nicht vorstellen
- 3) Du bist dir unsicher, ob es tatsächlich so ist

Drücke die entsprechende Taste

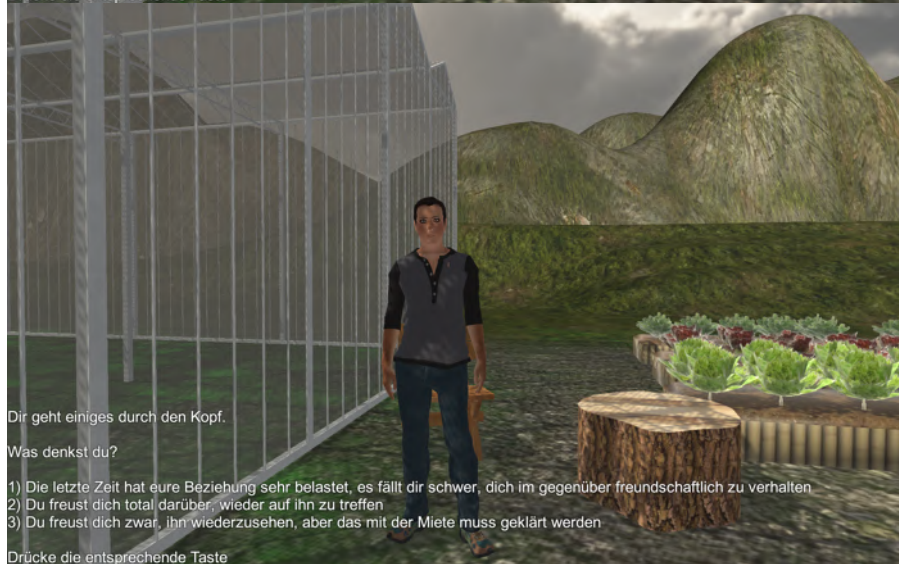

Dir geht einiges durch den Kopf.

Was denkst du?

- 1) Die letzte Zeit hat eure Beziehung sehr belastet, es fällt dir schwer, dich im gegenüber freundschaftlich zu verhalten
- 2) Du freust dich total darüber, wieder auf ihn zu treffen
- 3) Du freust dich zwar, ihn wiederzusehen, aber das mit der Miete muss geklärt werden

Drücke die entsprechende Taste

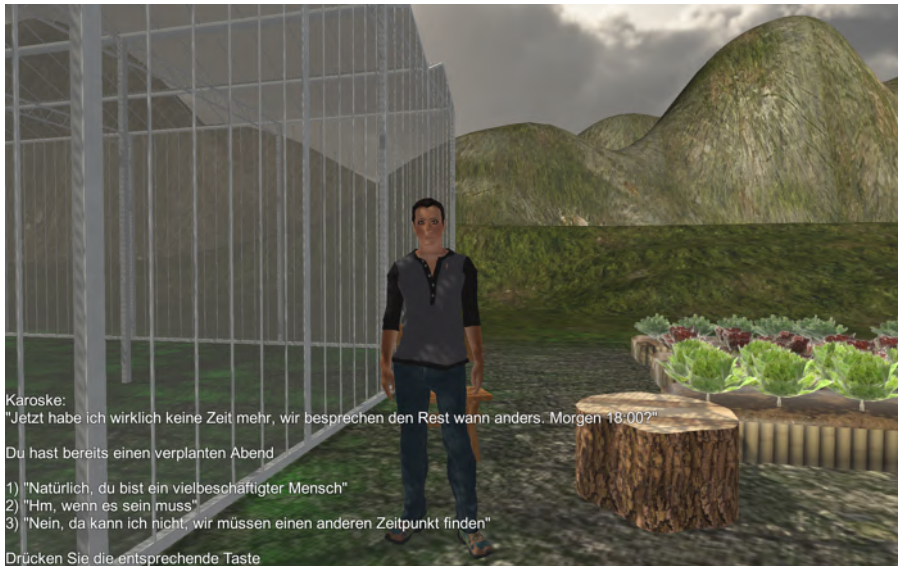

Karoske:  
"Jetzt habe ich wirklich keine Zeit mehr, wir besprechen den Rest wann anders. Morgen 18:00?"

Du hast bereits einen verplanten Abend

- 1) "Natürlich, du bist ein vielbeschäftigter Mensch"
- 2) "Hm, wenn es sein muss"
- 3) "Nein, da kann ich nicht, wir müssen einen anderen Zeitpunkt finden"

Drücken Sie die entsprechende Taste

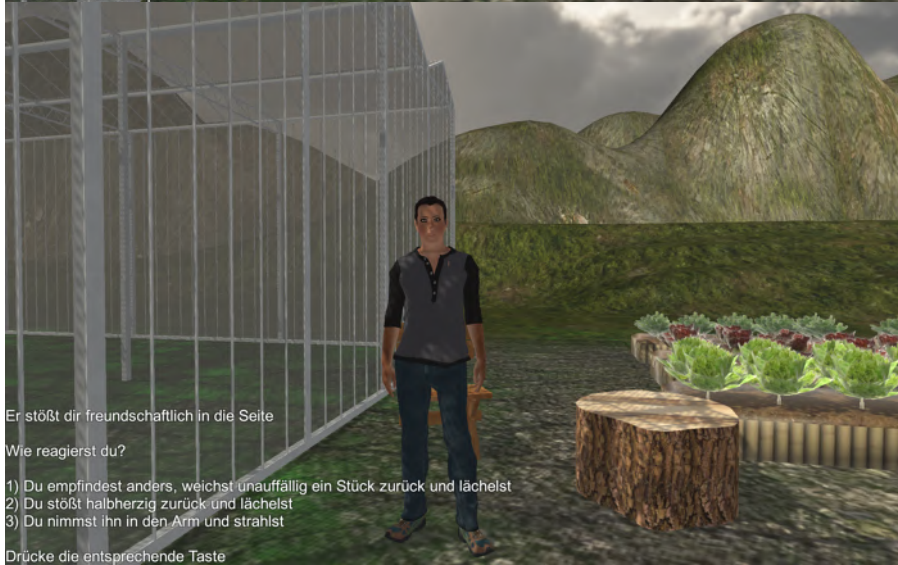

Er stößt dir freundschaftlich in die Seite

Wie reagierst du?

- 1) Du empfindest anders, weichst unauffällig ein Stück zurück und lächelst
- 2) Du stößt halbherzig zurück und lächelst
- 3) Du nimmst ihn in den Arm und strahlst

Drücke die entsprechende Taste

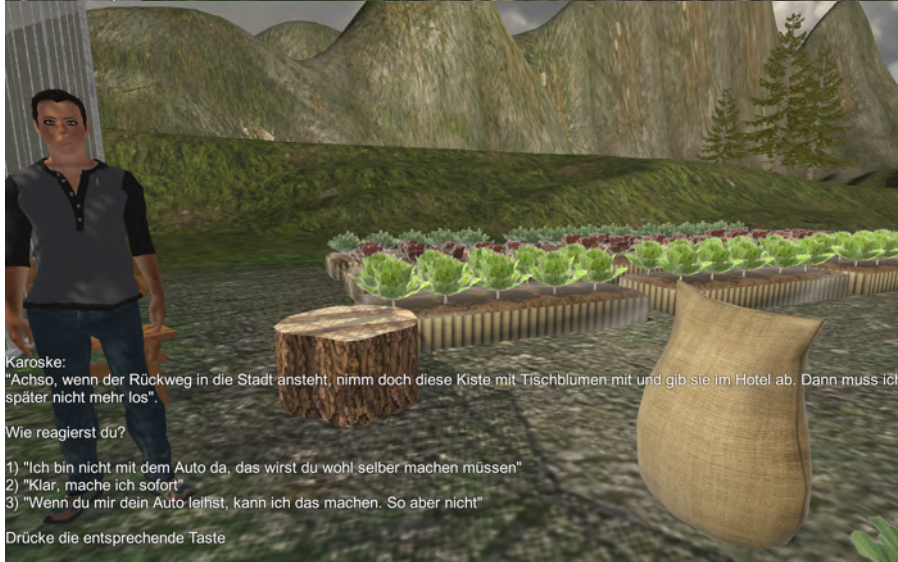

Karoske:  
"Achso, wenn der Rückweg in die Stadt ansteht, nimm doch diese Kiste mit Tischblümen mit und gib sie im Hotel ab. Dann muss ich später nicht mehr los".

Wie reagierst du?

- 1) "Ich bin nicht mit dem Auto da, das wirst du wohl selber machen müssen"
- 2) "Klar, mache ich sofort"
- 3) "Wenn du mir dein Auto leihst, kann ich das machen. So aber nicht"

Drücke die entsprechende Taste

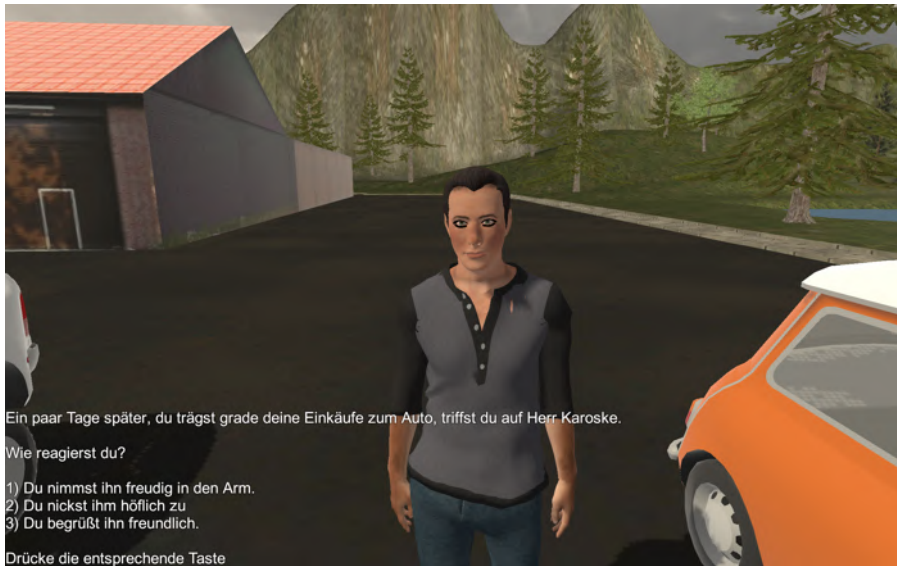

Ein paar Tage später, du trägst gerade deine Einkäufe zum Auto, triffst du auf Herr Karoske.

Wie reagierst du?

- 1) Du nimmst ihn freudig in den Arm.
- 2) Du nickst ihm höflich zu
- 3) Du begrüßt ihn freundlich.

Drücke die entsprechende Taste

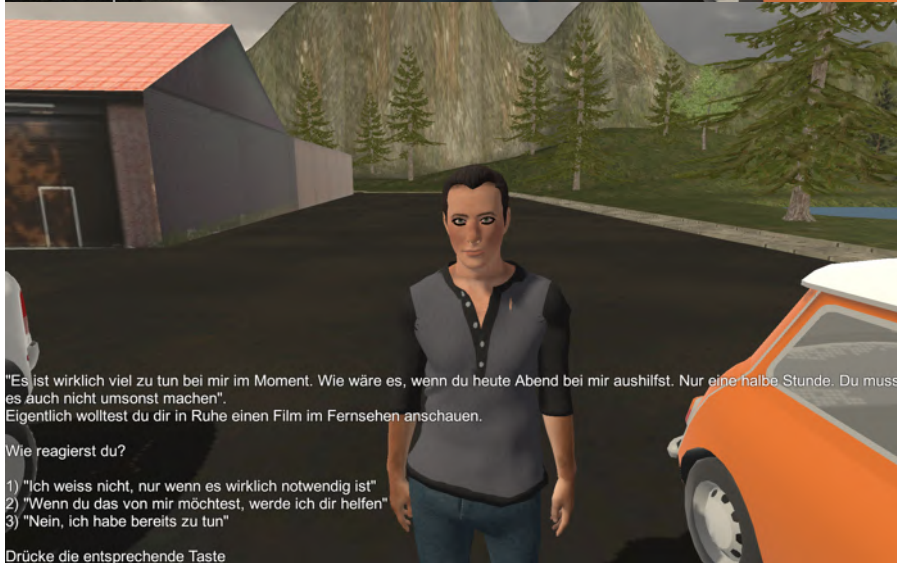

"Es ist wirklich viel zu tun bei mir im Moment. Wie wäre es, wenn du heute Abend bei mir aushilfst. Nur eine halbe Stunde. Du musst es auch nicht umsonst machen".  
Eigentlich wolltest du dir in Ruhe einen Film im Fernsehen anschauen.

Wie reagierst du?

- 1) "Ich weiss nicht, nur wenn es wirklich notwendig ist"
- 2) "Wenn du das von mir möchtest, werde ich dir helfen"
- 3) "Nein, ich habe bereits zu tun"

Drücke die entsprechende Taste

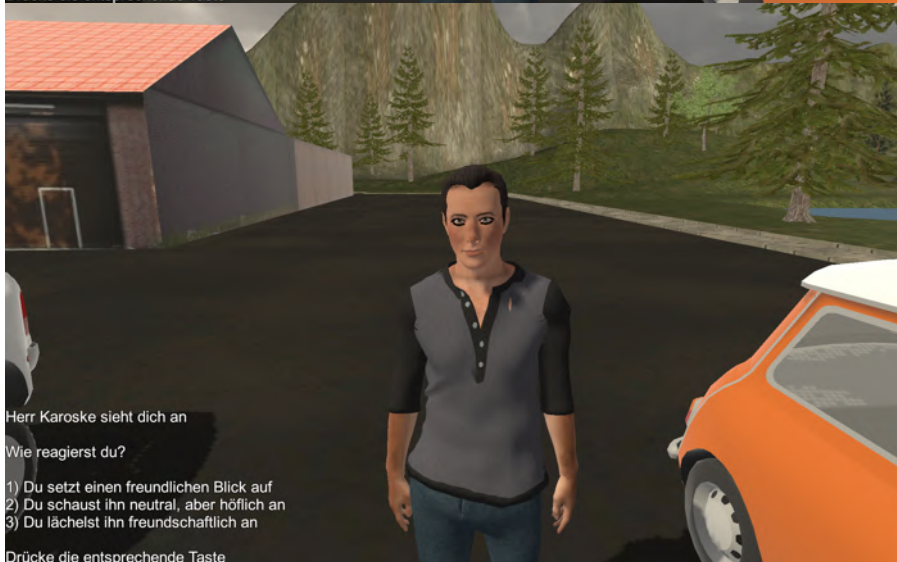

Herr Karoske sieht dich an

Wie reagierst du?

- 1) Du setzt einen freundlichen Blick auf
- 2) Du schaust ihn neutral, aber höflich an
- 3) Du lächelst ihn freundschaftlich an

Drücke die entsprechende Taste

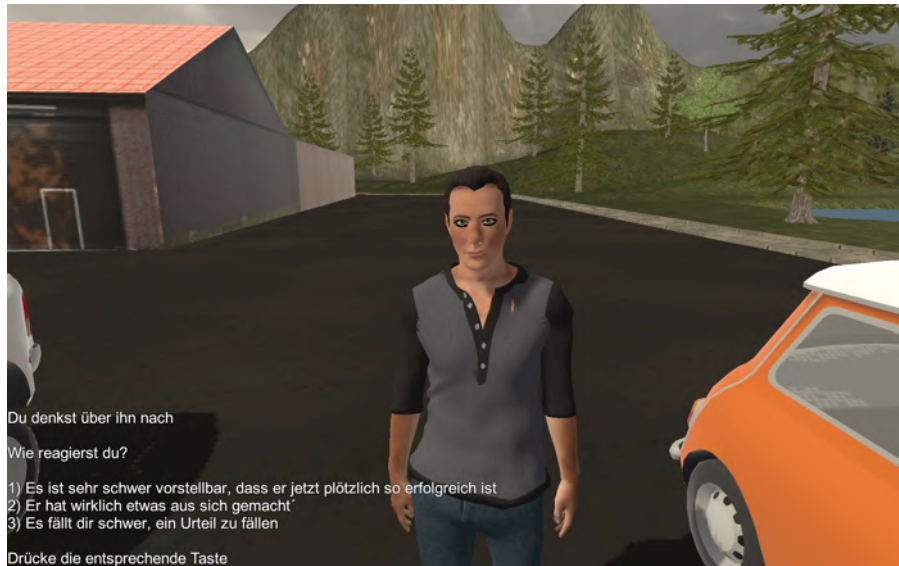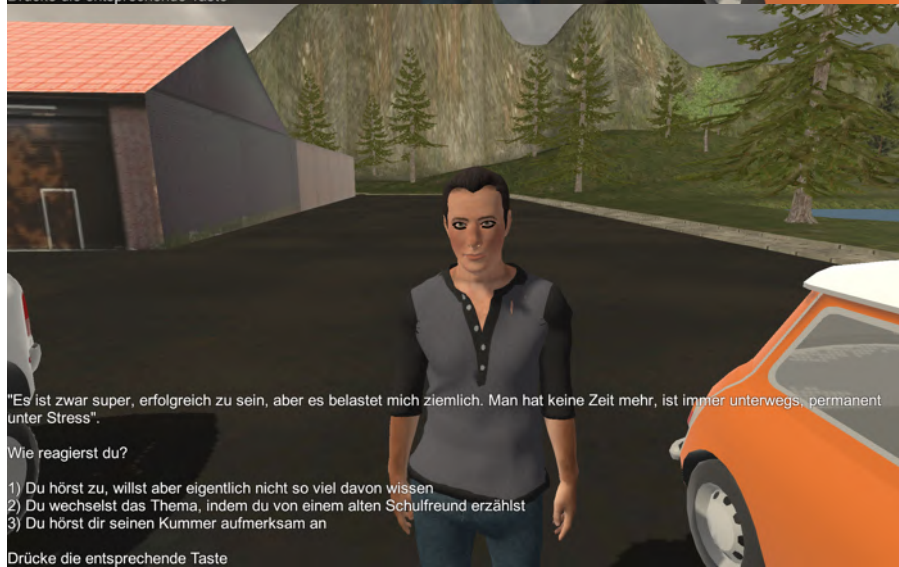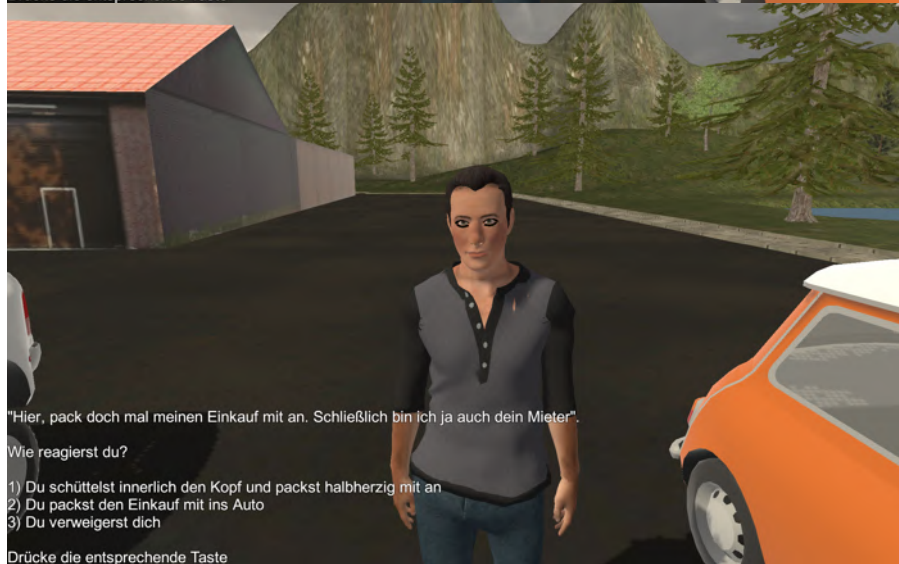



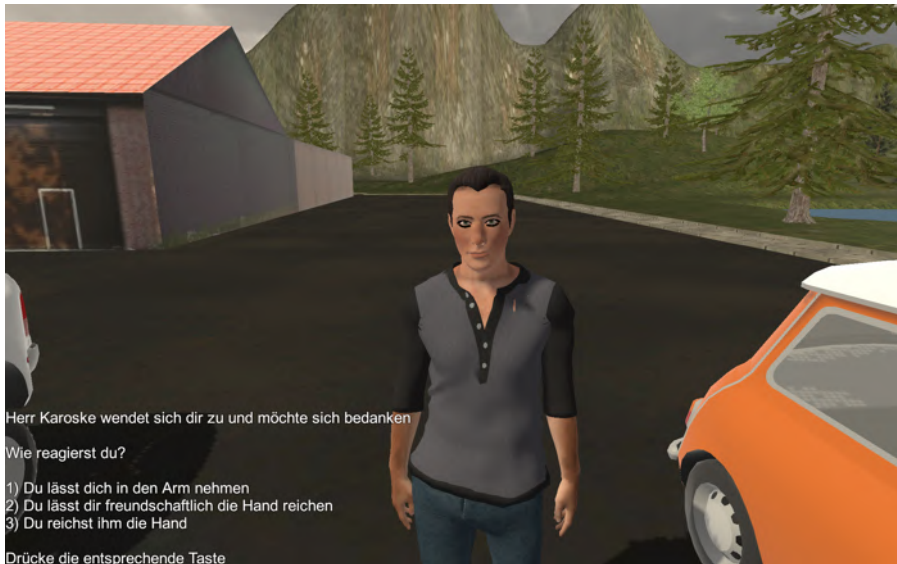

Herr Karoske wendet sich dir zu und möchte sich bedanken

Wie reagierst du?

- 1) Du lässt dich in den Arm nehmen
- 2) Du lässt dir freundschaftlich die Hand reichen
- 3) Du reichst ihm die Hand

Drücke die entsprechende Taste

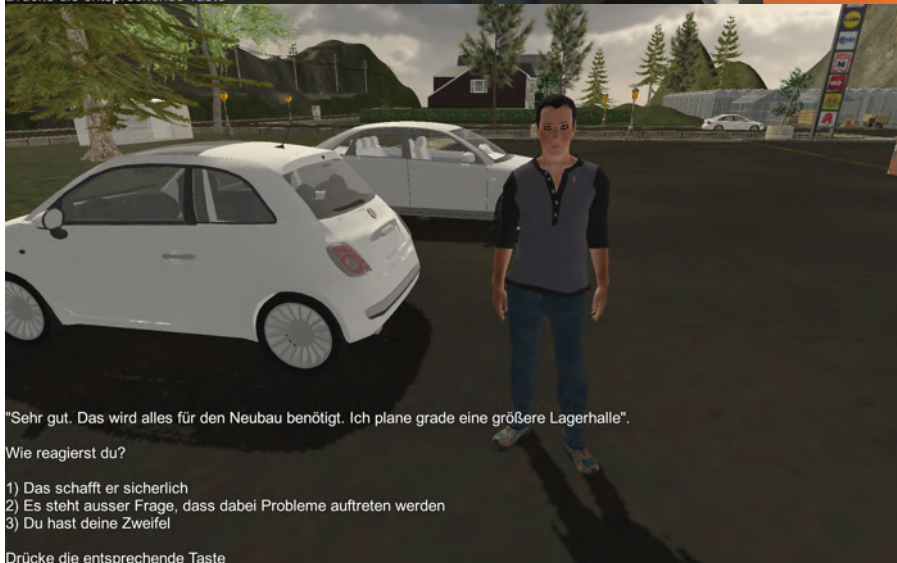

"Sehr gut. Das wird alles für den Neubau benötigt. Ich plane gerade eine größere Lagerhalle".

Wie reagierst du?

- 1) Das schafft er sicherlich
- 2) Es steht ausser Frage, dass dabei Probleme auftreten werden
- 3) Du hast deine Zweifel

Drücke die entsprechende Taste

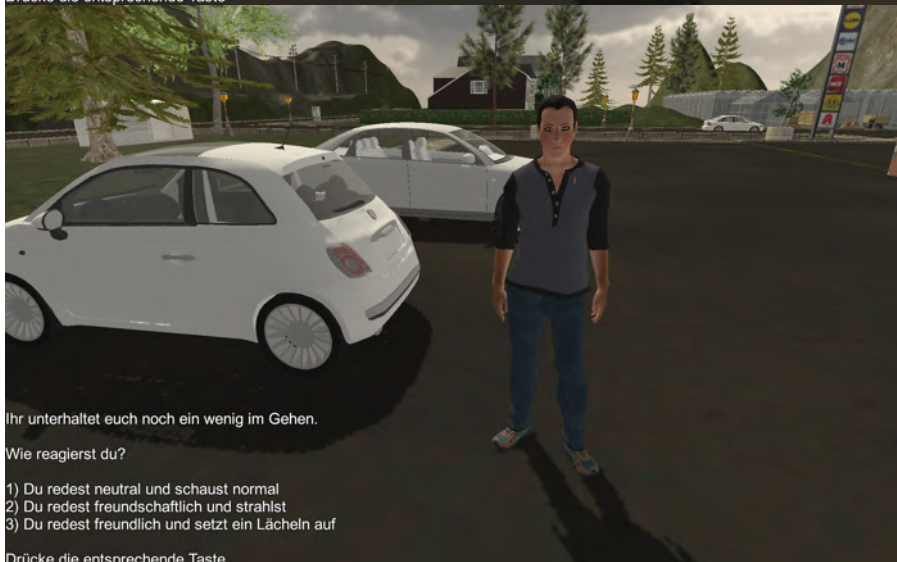

Ihr unterhaltet euch noch ein wenig im Gehen.

Wie reagierst du?

- 1) Du redest neutral und schaut normal
- 2) Du redest freundschaftlich und strahlst
- 3) Du redest freundlich und setzt ein Lächeln auf

Drücke die entsprechende Taste

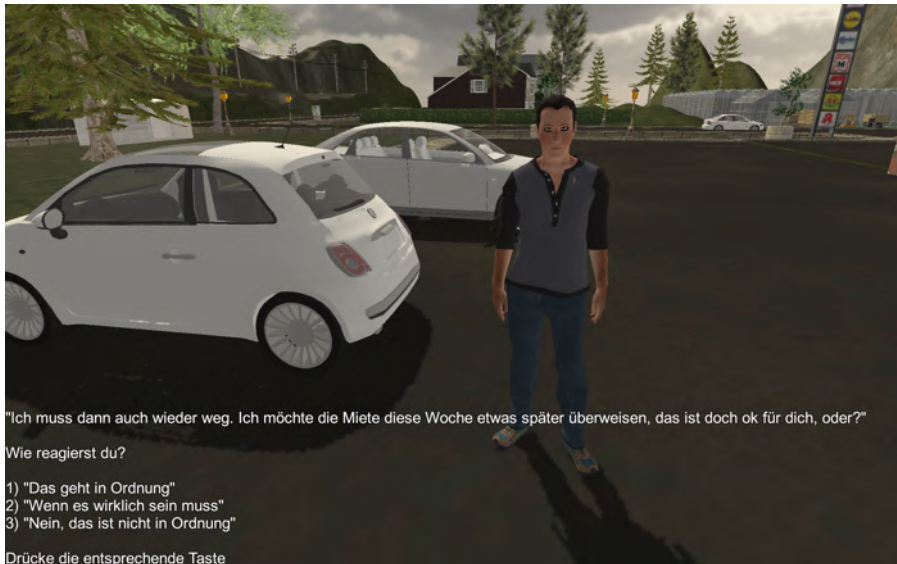

"Ich muss dann auch wieder weg. Ich möchte die Miete diese Woche etwas später überweisen, das ist doch ok für dich, oder?"

Wie reagierst du?

- 1) "Das geht in Ordnung"
- 2) "Wenn es wirklich sein muss"
- 3) "Nein, das ist nicht in Ordnung"

Drücke die entsprechende Taste

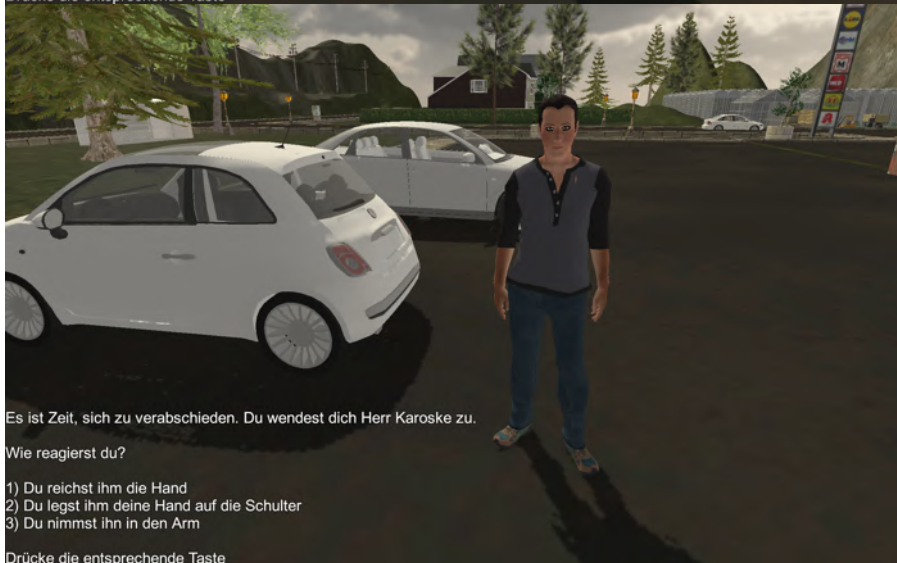

Es ist Zeit, sich zu verabschieden. Du wendest dich Herr Karoske zu.

Wie reagierst du?

- 1) Du reichst ihm die Hand
- 2) Du legst ihm deine Hand auf die Schulter
- 3) Du nimmst ihn in den Arm

Drücke die entsprechende Taste

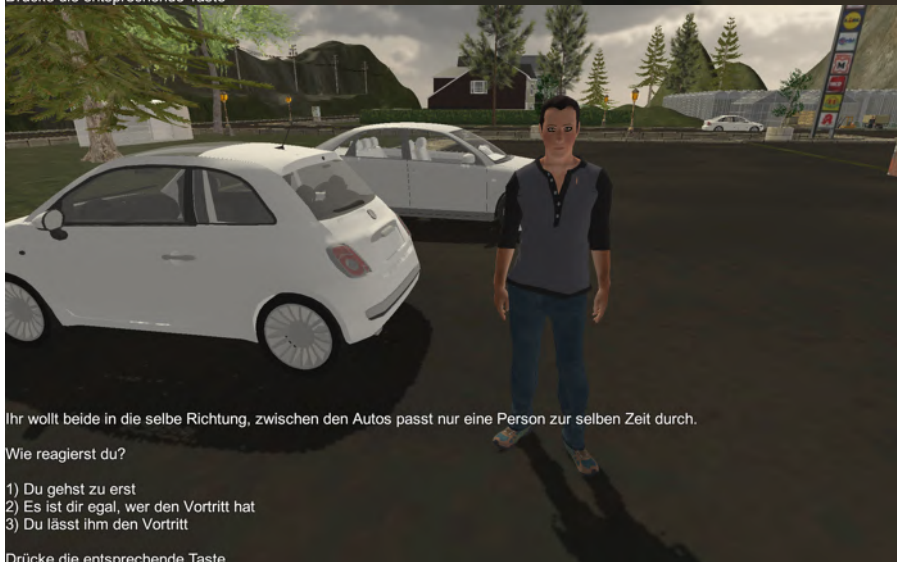

Ihr wollt beide in die selbe Richtung, zwischen den Autos passt nur eine Person zur selben Zeit durch.

Wie reagierst du?

- 1) Du gehst zu erst
- 2) Es ist dir egal, wer den Vortritt hat
- 3) Du lässt ihm den Vortritt

Drücke die entsprechende Taste
